# Supplementary material
Source: MDPI journal article supplement (https://www.mdpi.com/1996-1073/16/8/3597)
Supplement: s1 [file s1]

## Supplementary Material

- Air velocity in reaction cell and current lines.

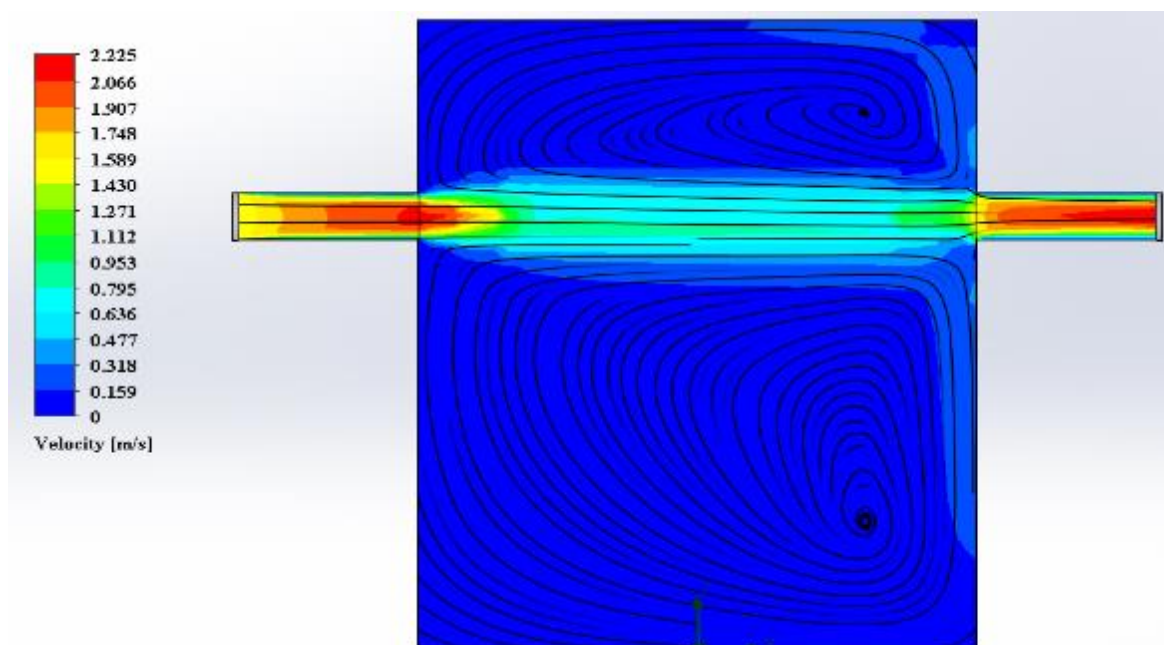

Figure S1. Air velocity in reaction cell and current lines, in run 2, for the geometry with lateral air inlet and outlet.

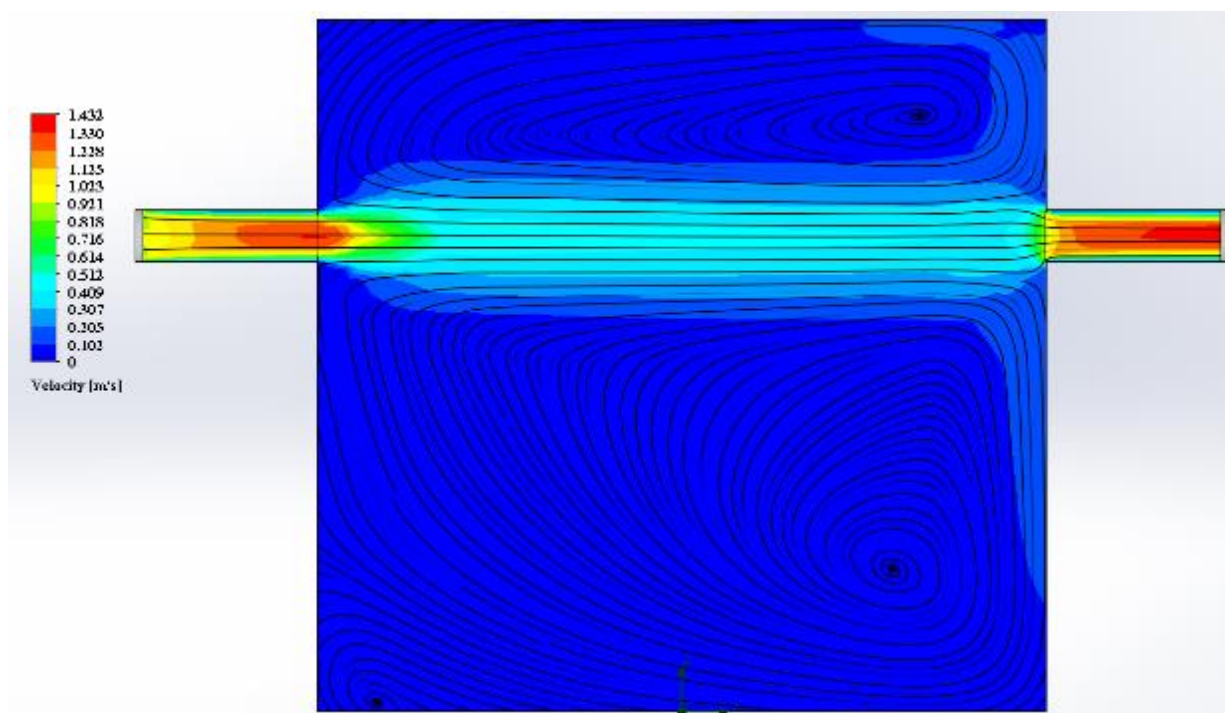

Figure S2. Air velocity in reaction cell and current lines, in run 3, for the geometry with lateral air inlet and outlet.

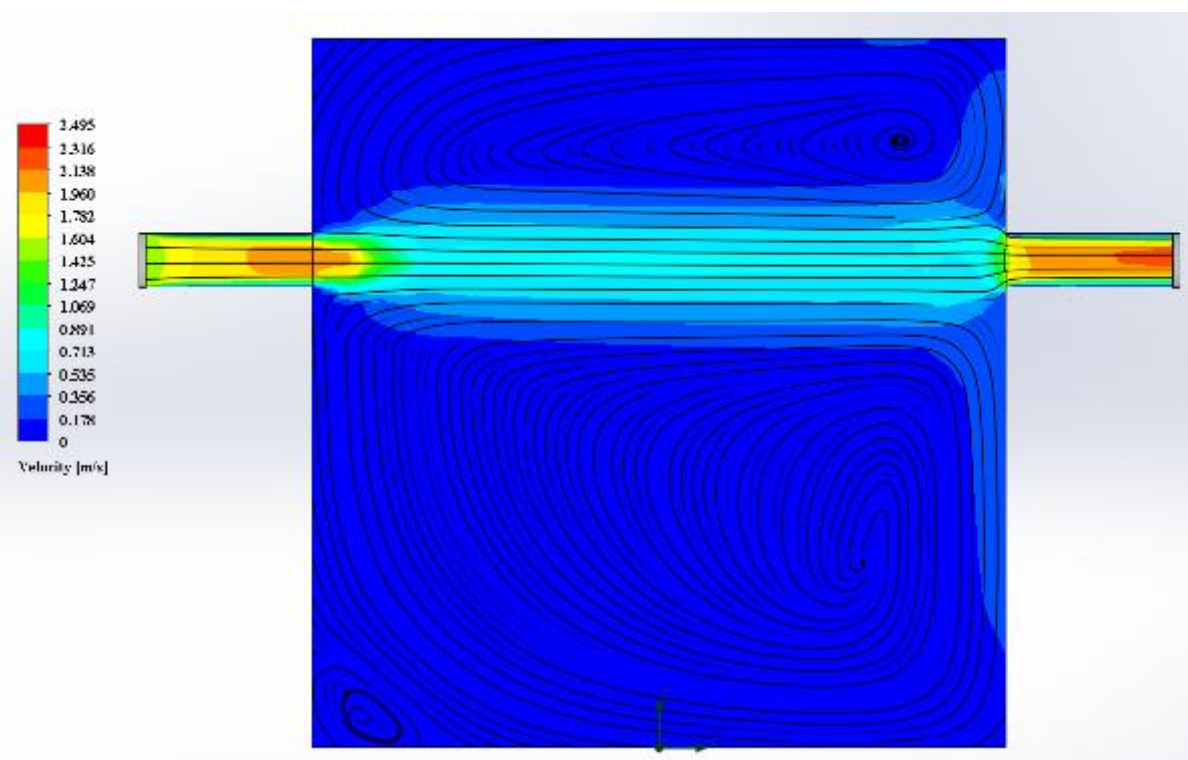

Figure S3. Air velocity in reaction cell and current lines, in run 4, for the geometry with lateral air inlet and outlet.

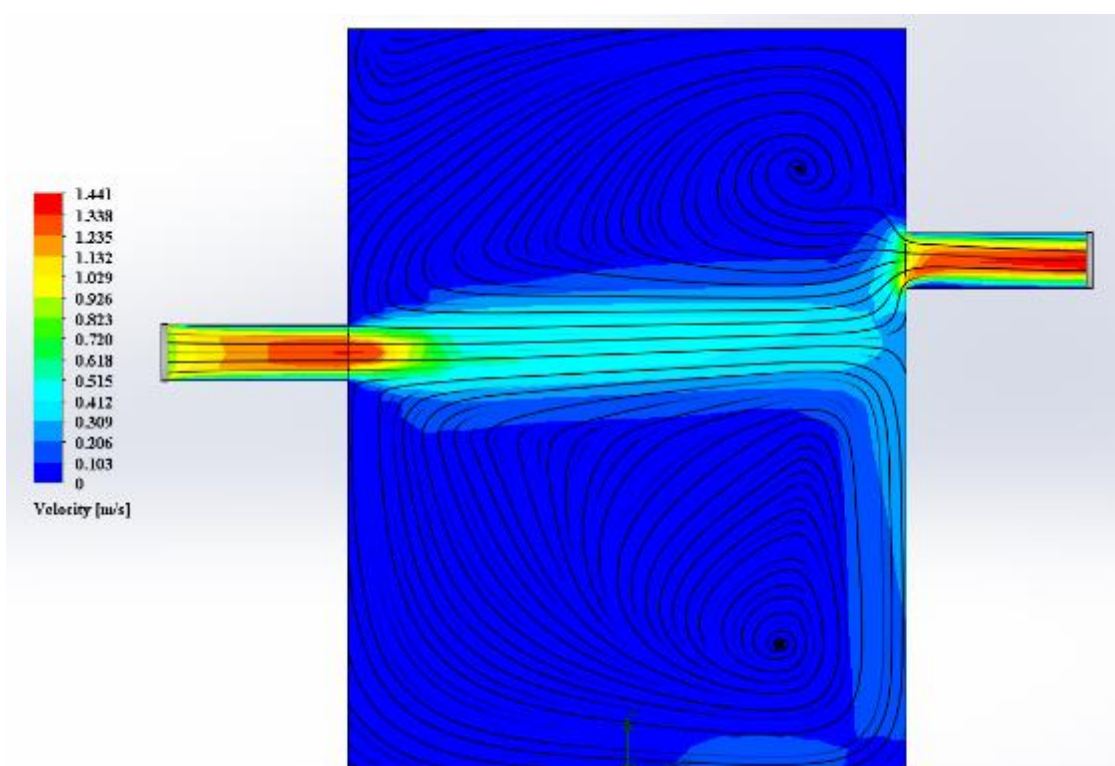

Figure S4. Air velocity in reaction cell and current lines, in run 5, for the geometry with lateral air inlet and outlet.

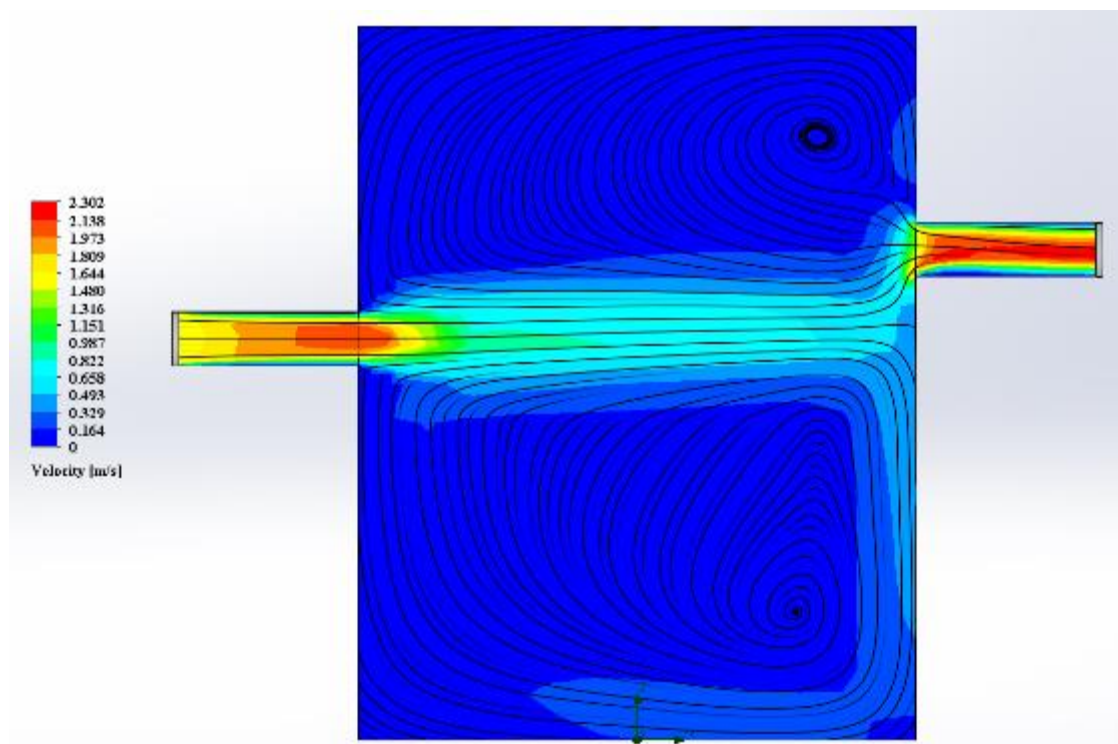

Figure S5. Air velocity in reaction cell and current lines, in run 6, for the geometry with lateral air inlet and outlet.

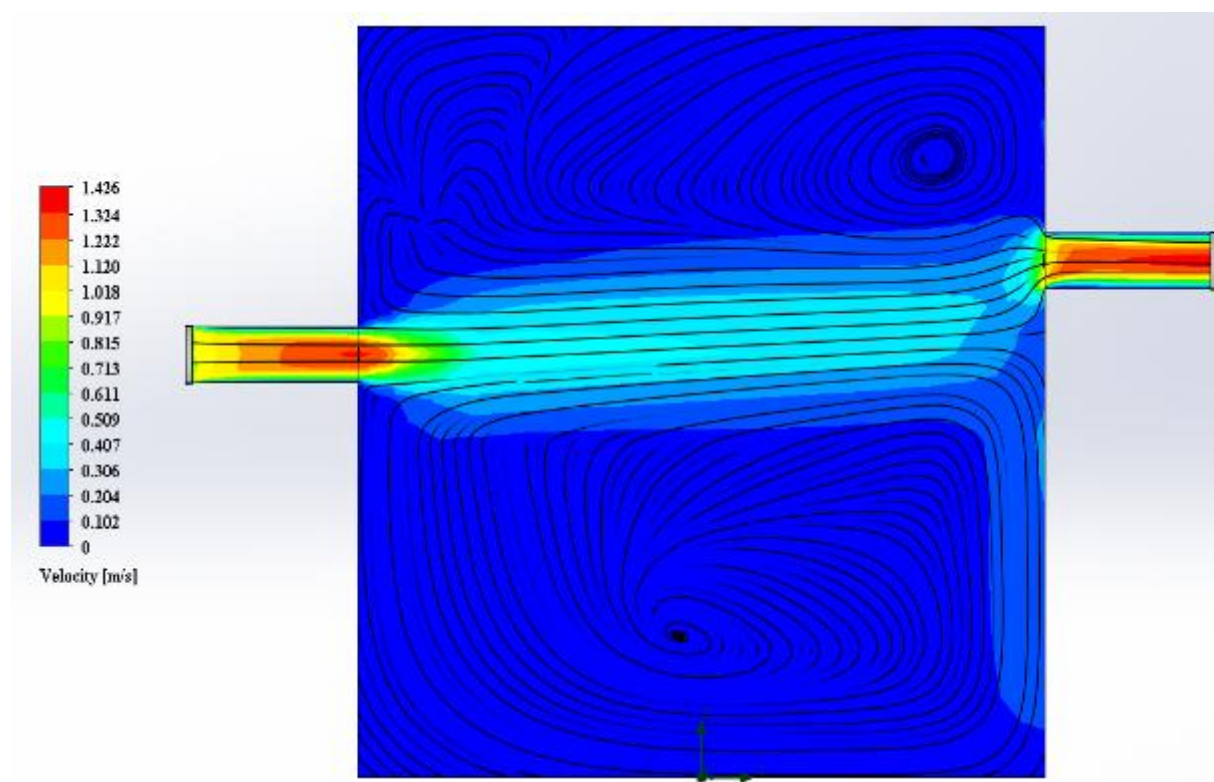

Figure S6. Air velocity in reaction cell and current lines, in run 7, for the geometry with lateral air inlet and outlet.

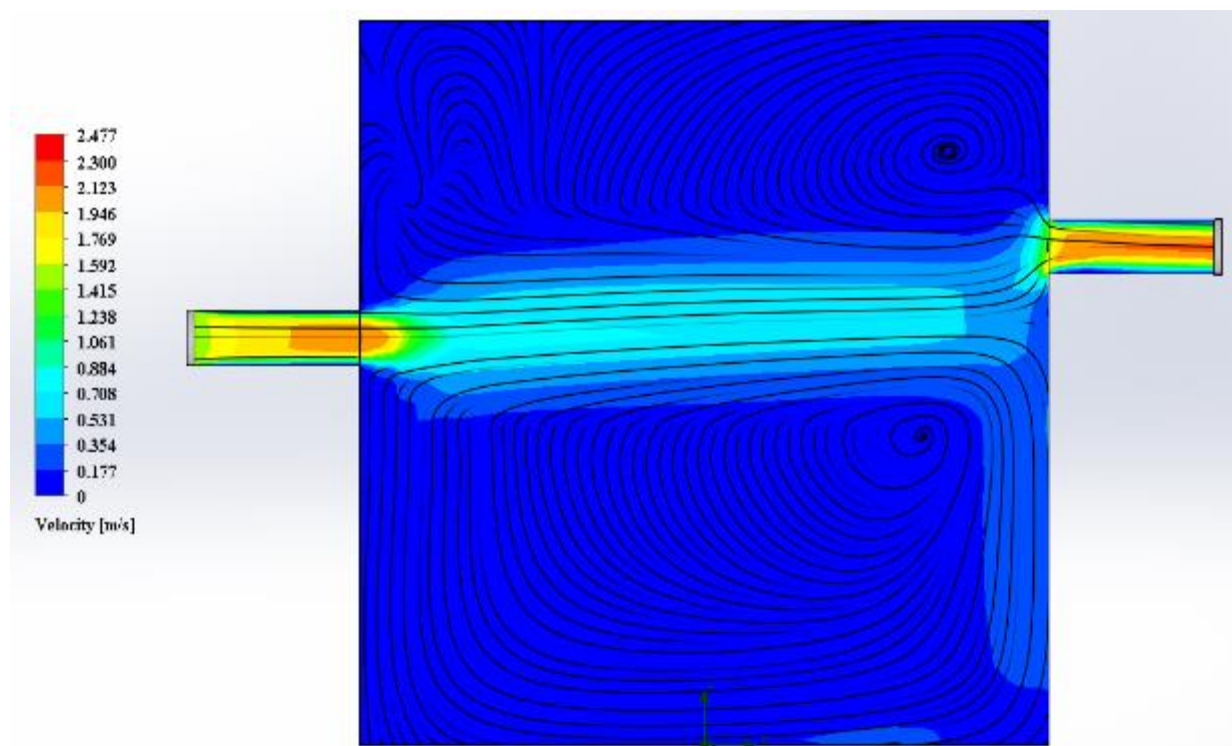

Figure S7. Air velocity in reaction cell and current lines, in run 8, for the geometry with lateral air inlet and outlet.

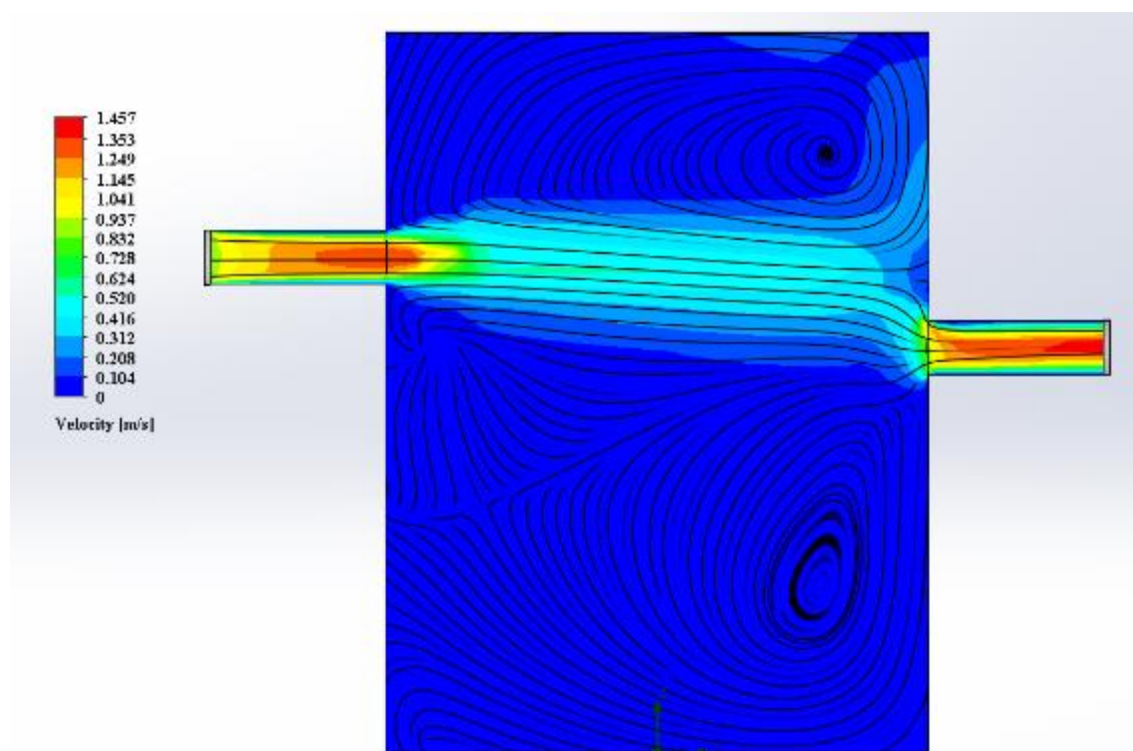

Figure S8. Air velocity in reaction cell and current lines, in run 9, for the geometry with lateral air inlet and outlet.

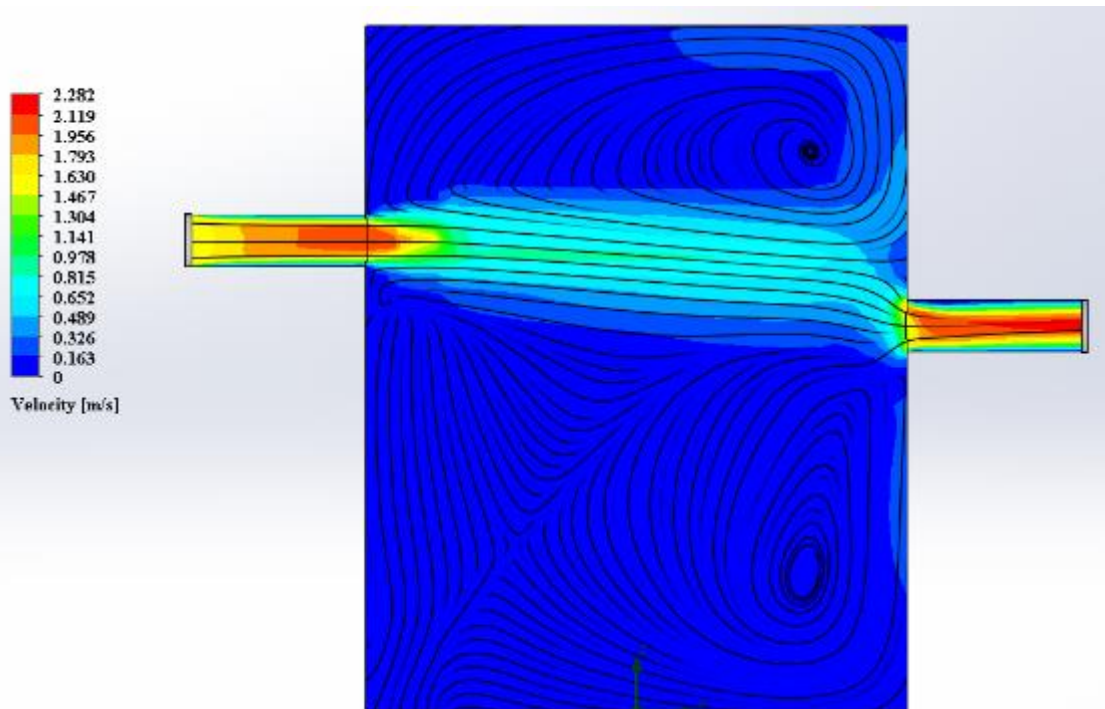

Figure S9. Air velocity in reaction cell and current lines, in run 10, for the geometry with lateral air inlet and outlet.

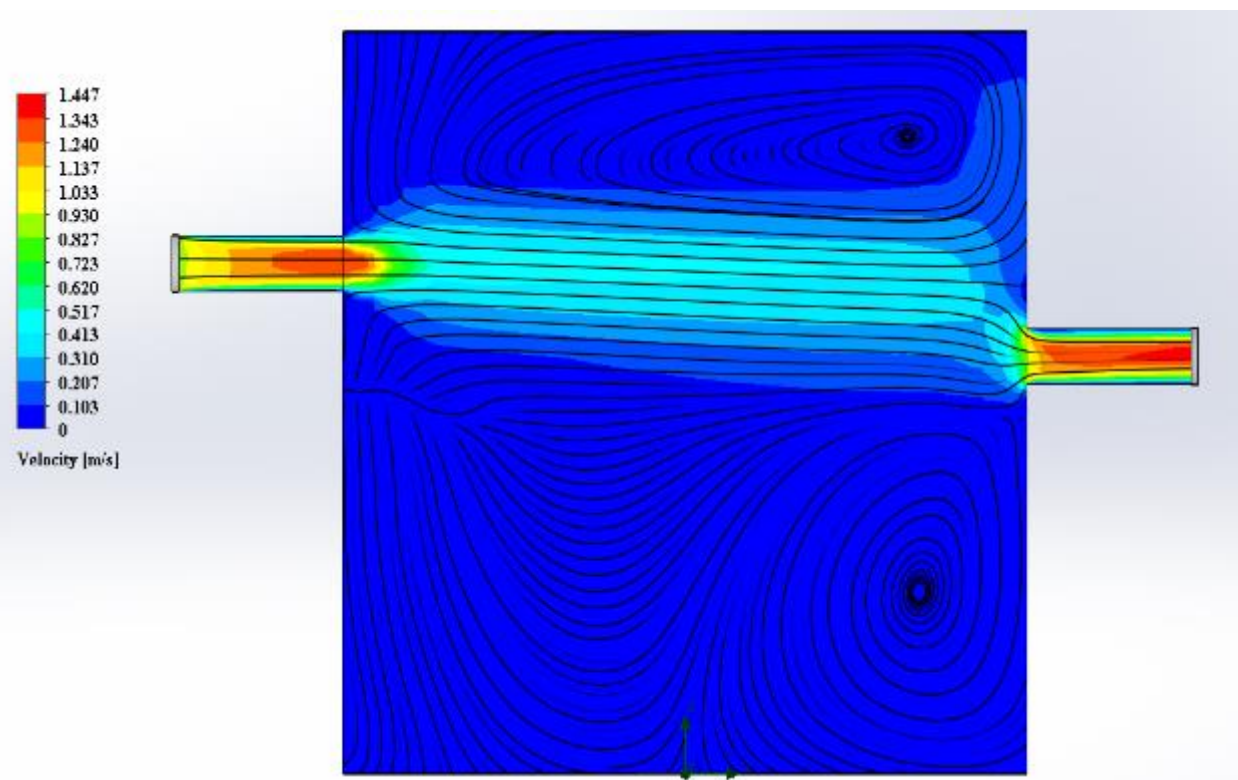

Figure S10. Air velocity in reaction cell and current lines, in run 11, for the geometry with lateral air inlet and outlet.

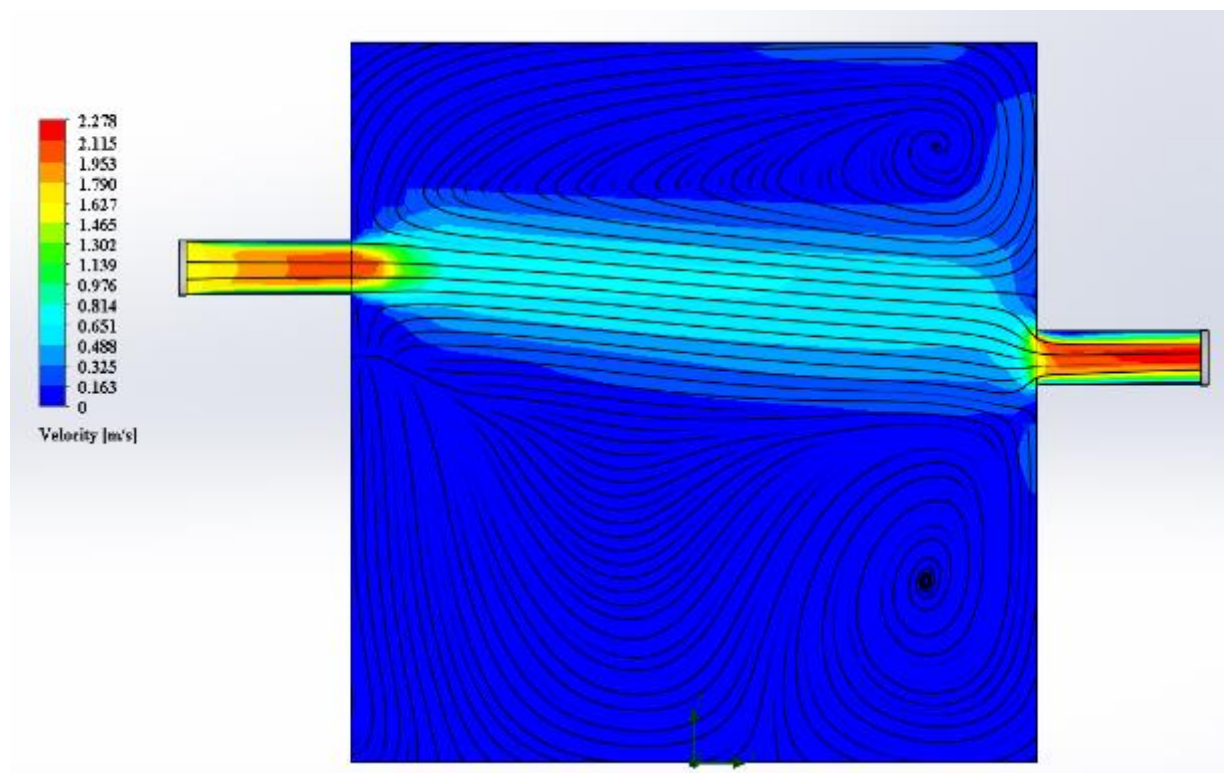

Figure S11. Air velocity in reaction cell and current lines, in run 12, for the geometry with lateral air inlet and outlet.

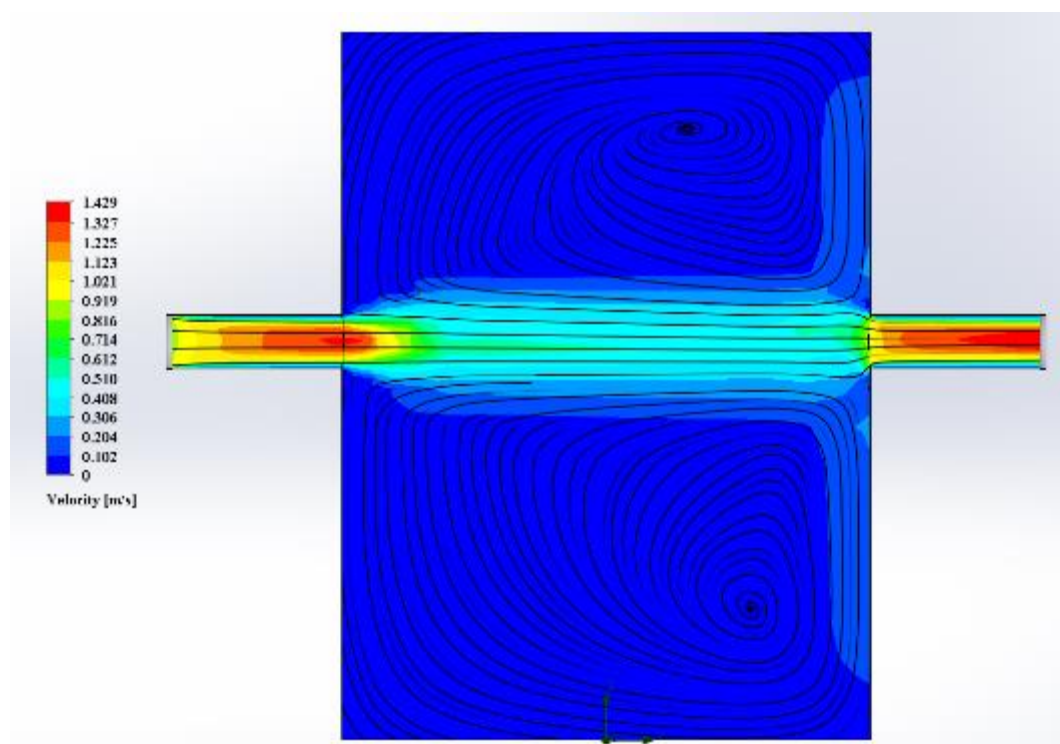

Figure S12. Air velocity in reaction cell and current lines, in run 13, for the geometry with lateral air inlet and outlet.

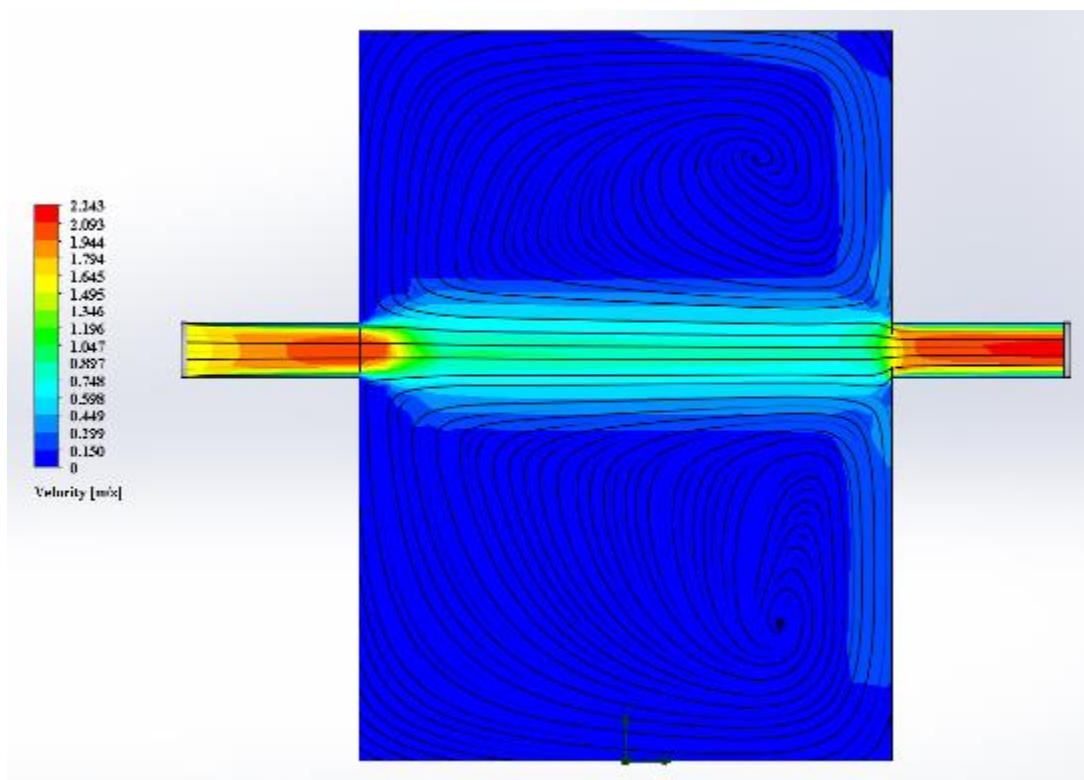

Figure S13. Air velocity in reaction cell and current lines, in run 14, for the geometry with lateral air inlet and outlet.

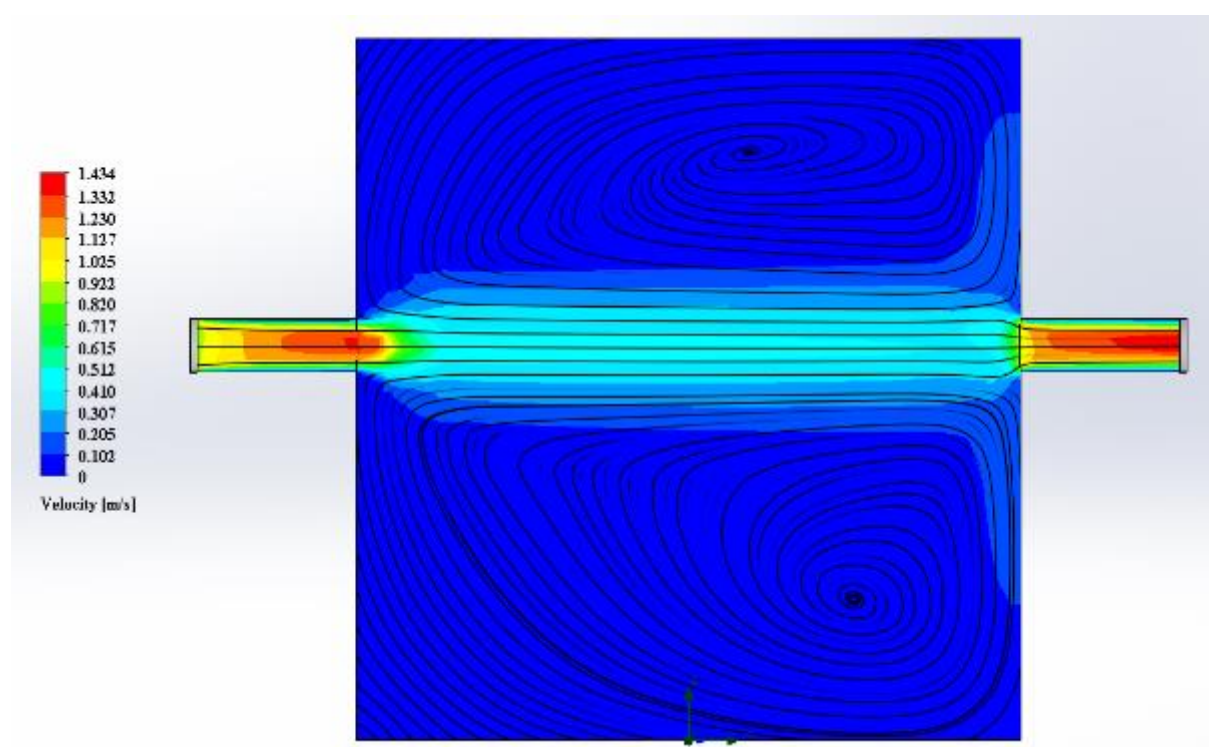

Figure S14. Air velocity in reaction cell and current lines, in run 15, for the geometry with lateral air inlet and outlet.

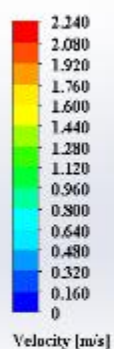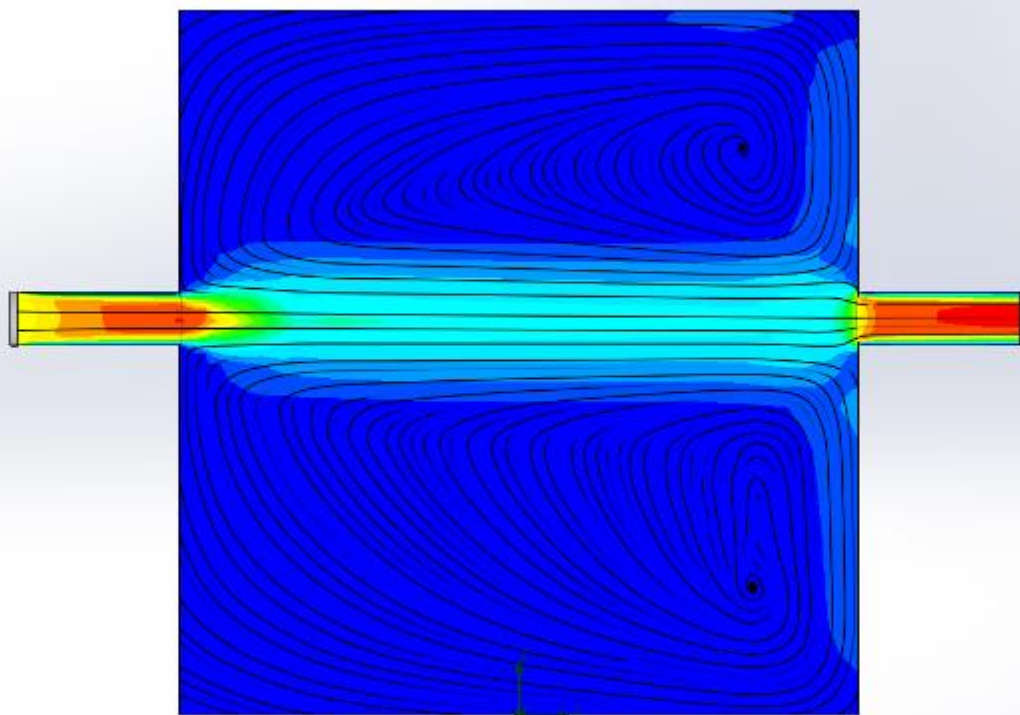

Figure S15. Air velocity in reaction cell and current lines, in run 16, for the geometry with lateral air inlet and outlet.

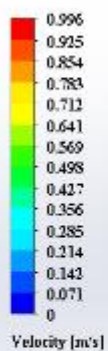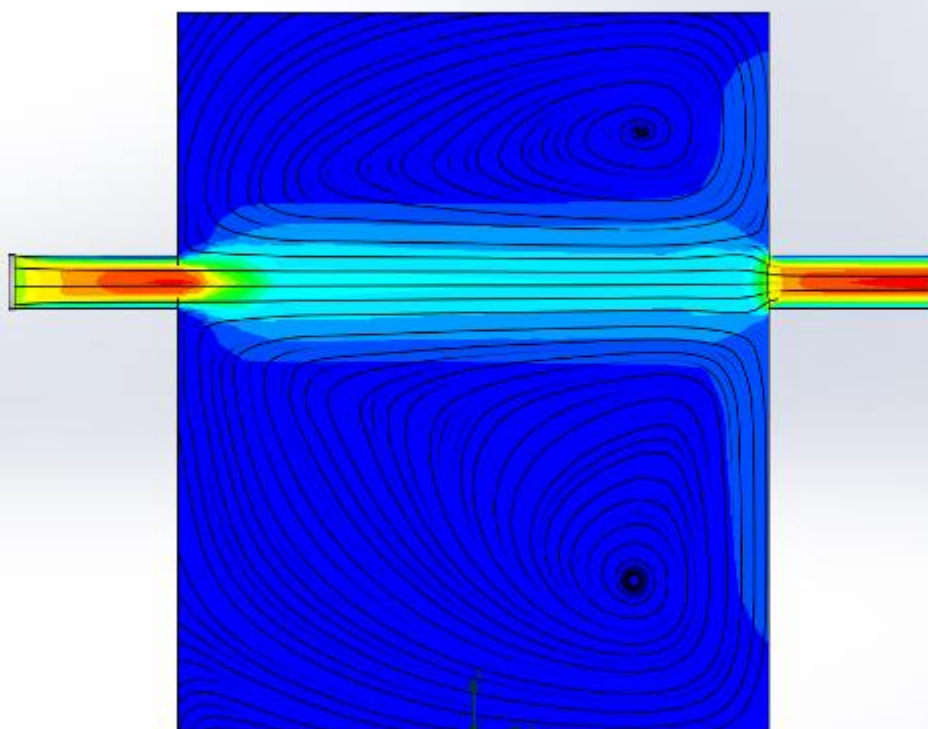

Figure S16. Air velocity in reaction cell and current lines, in run 17, for the geometry with lateral air inlet and outlet.

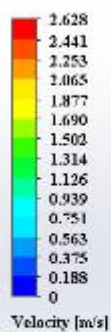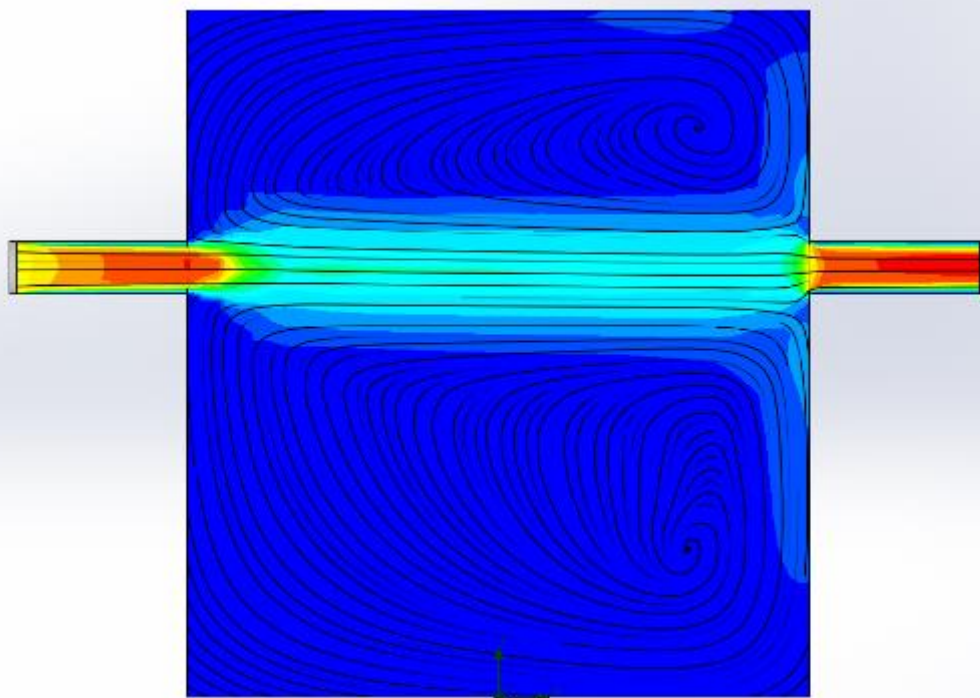

Figure S17. Air velocity in reaction cell and current lines, in run 18, for the geometry with lateral air inlet and outlet.

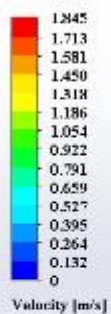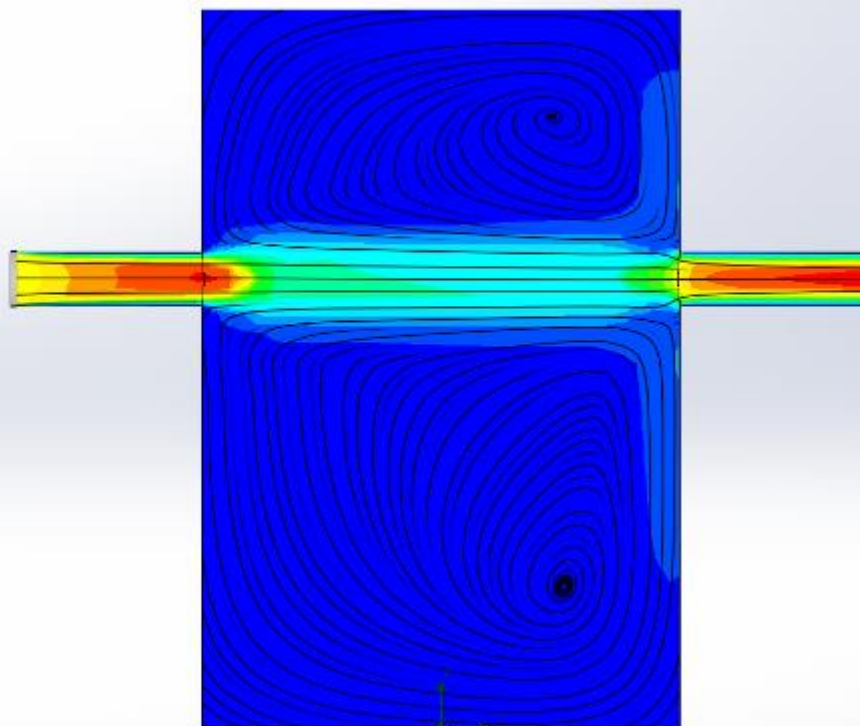

Figure S18. Air velocity in reaction cell and current lines, in run 19, for the geometry with lateral air inlet and outlet.

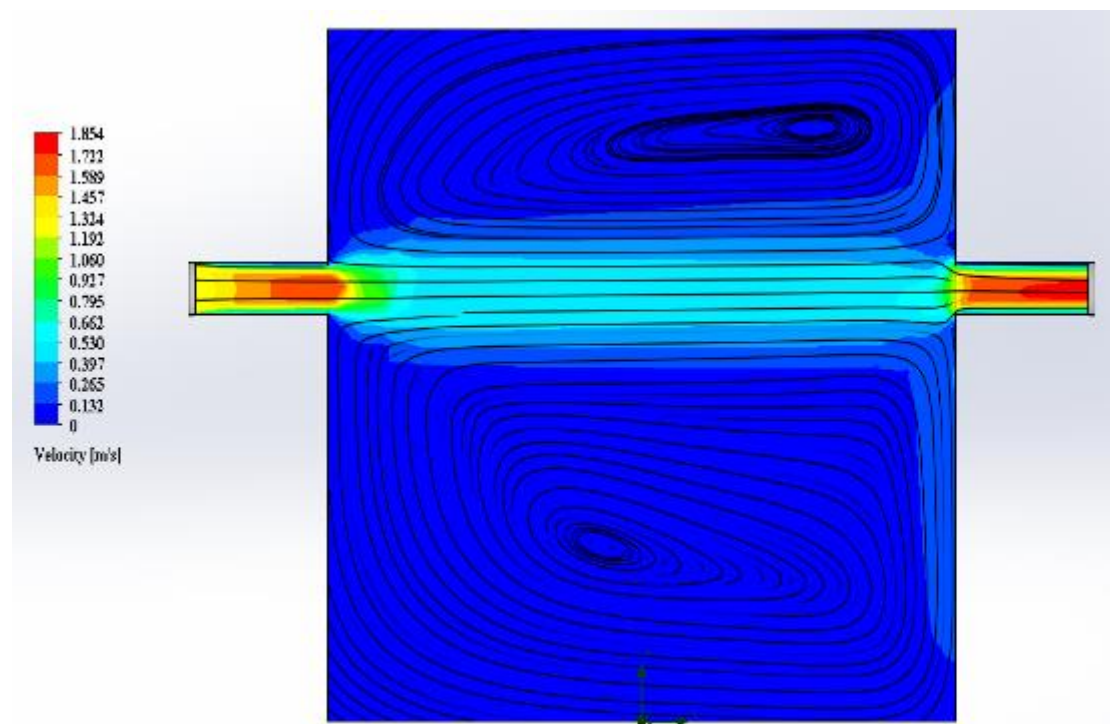

Figure S19. Air velocity in reaction cell and current lines, in run 20, for the geometry with lateral air inlet and outlet.

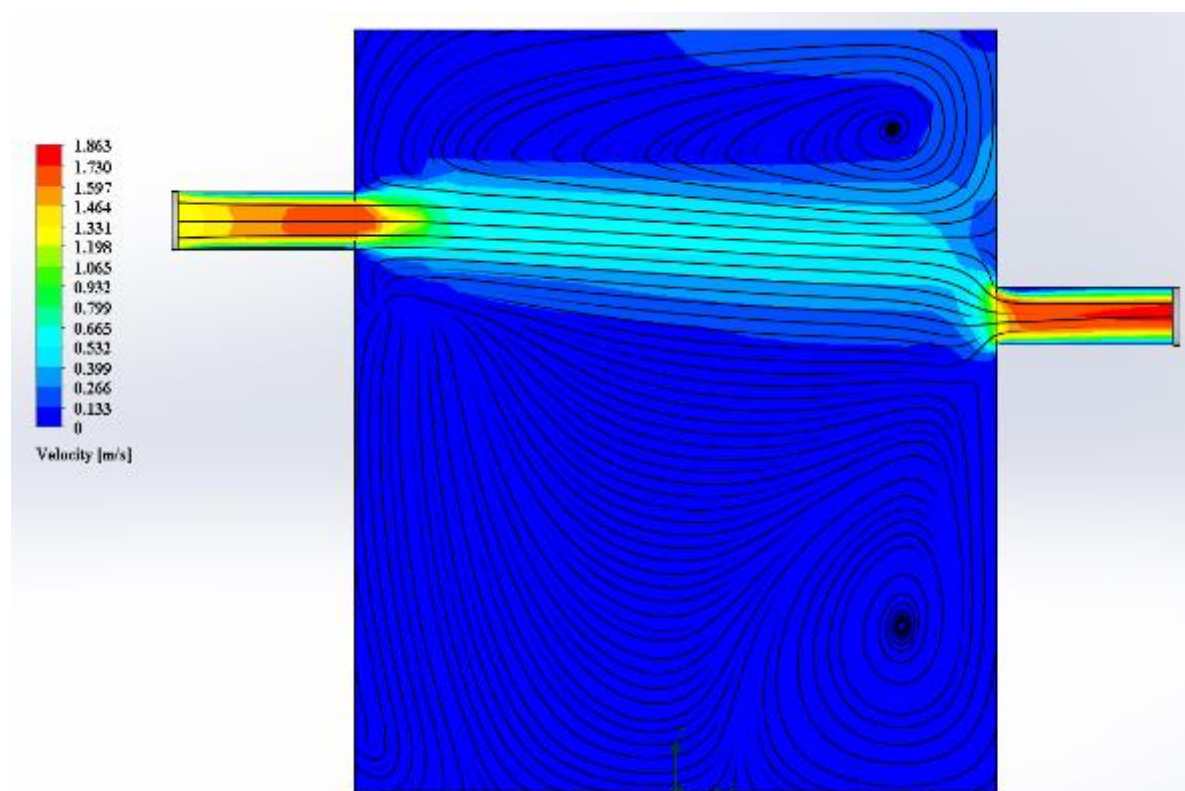

Figure S20. Air velocity in reaction cell and current lines, in run 21, for the geometry with lateral air inlet and outlet.

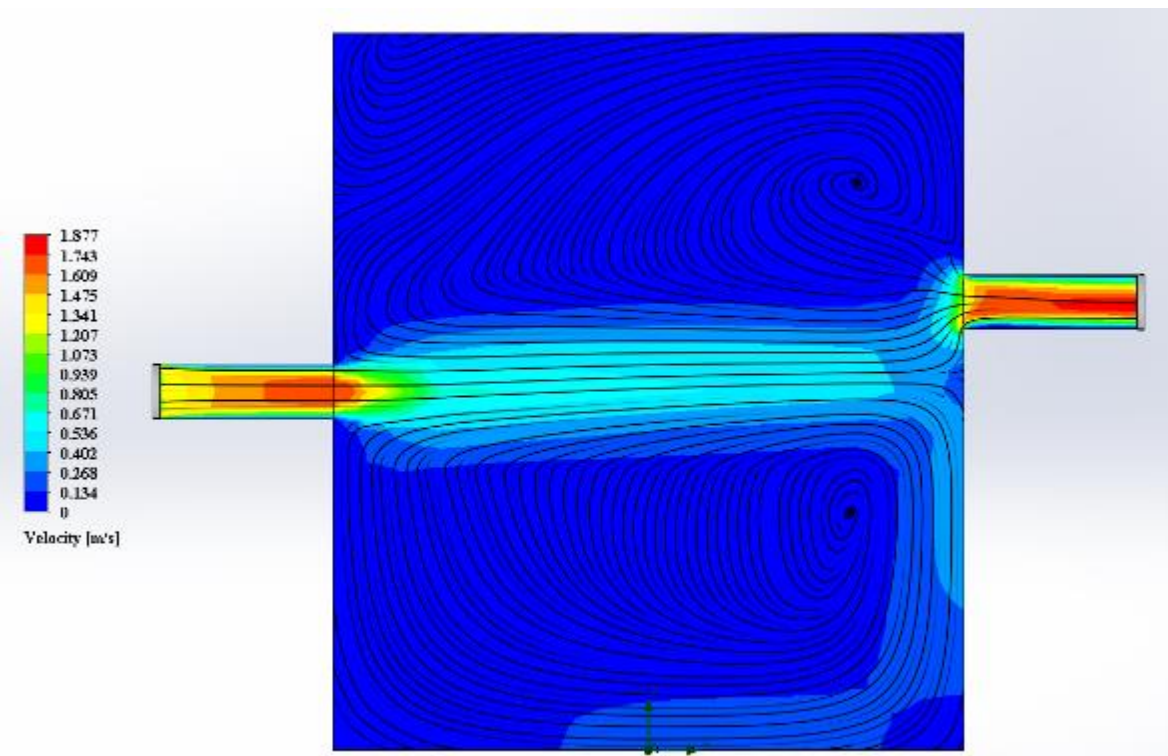

Figure S21. Air velocity in reaction cell and current lines, in run 22, for the geometry with lateral air inlet and outlet.

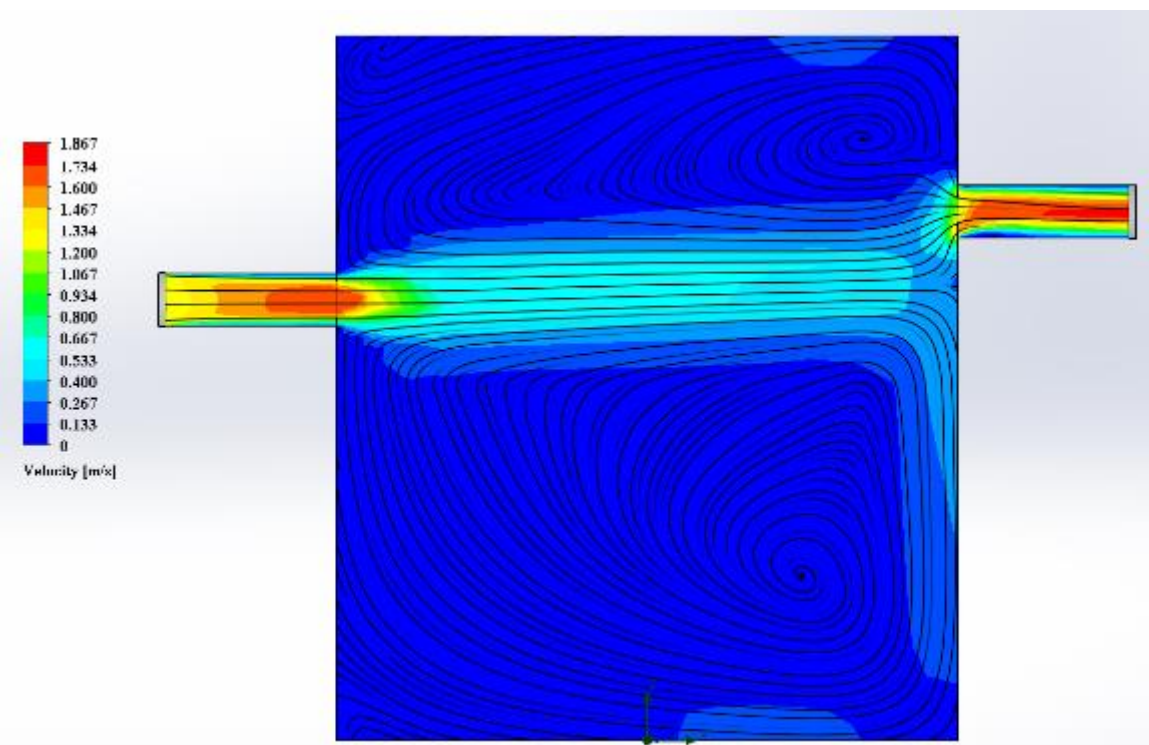

Figure S22. Air velocity in reaction cell and current lines, in run 23, for the geometry with lateral air inlet and outlet.

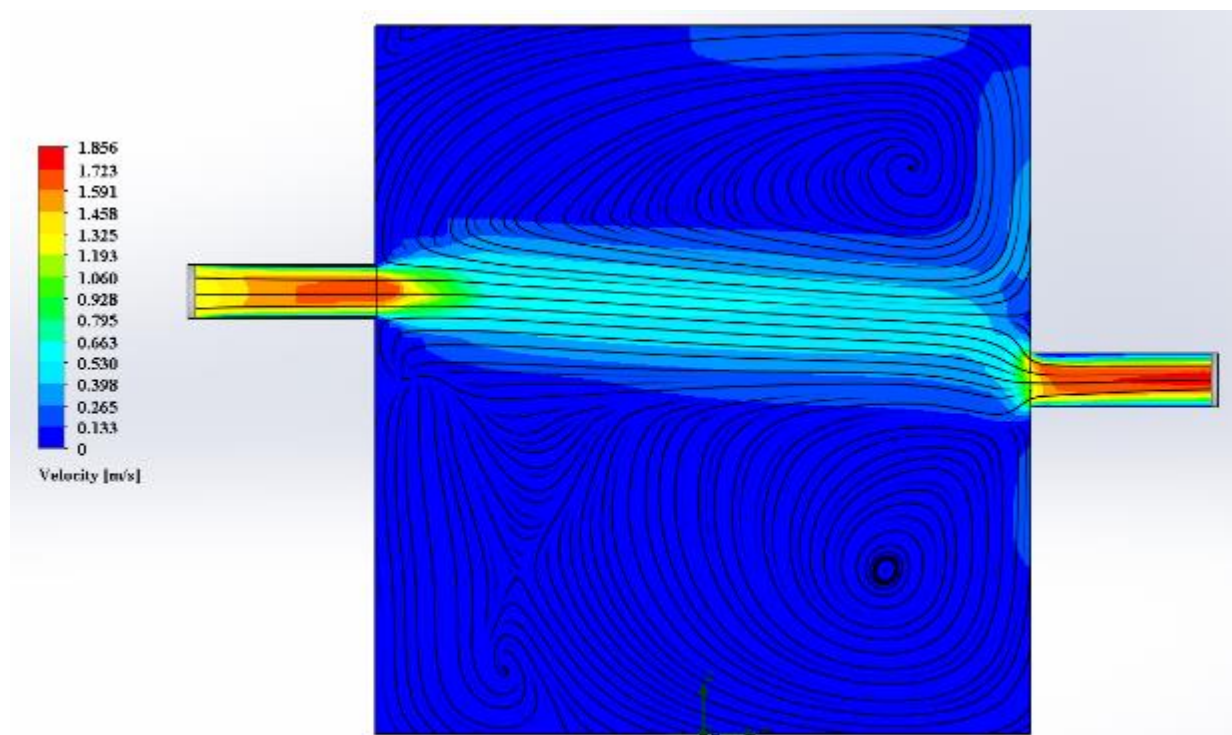

Figure S23. Air velocity in reaction cell and current lines, in run 24, for the geometry with lateral air inlet and outlet.

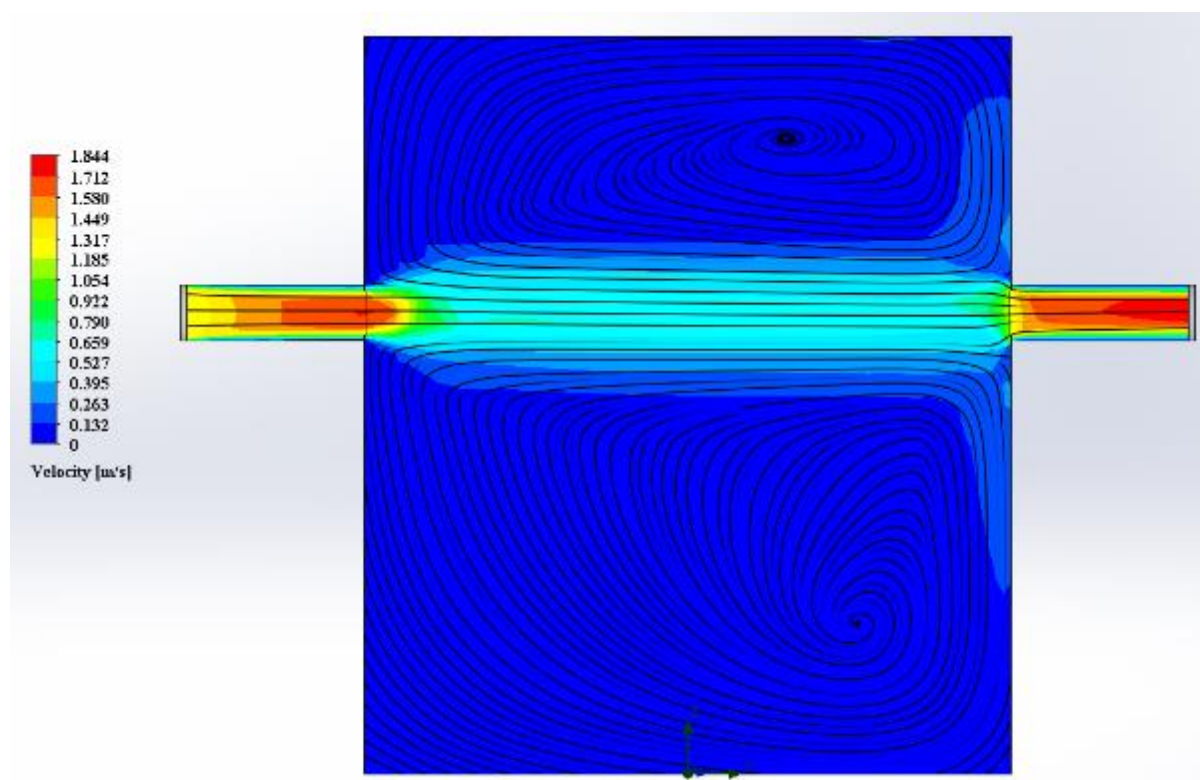

Figure S24. Air velocity in reaction cell and current lines, in run 25, for the geometry with lateral air inlet and outlet.

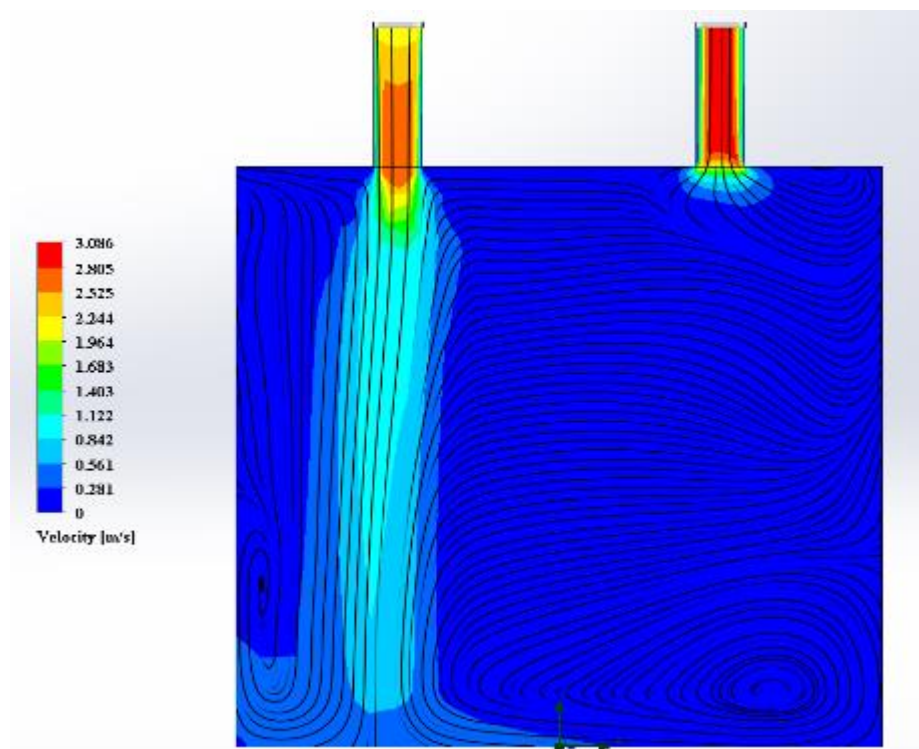

Figure S25. Air velocity in reaction cell and current lines, in run 2, for geometry with air inlet and outlet in the upper region.

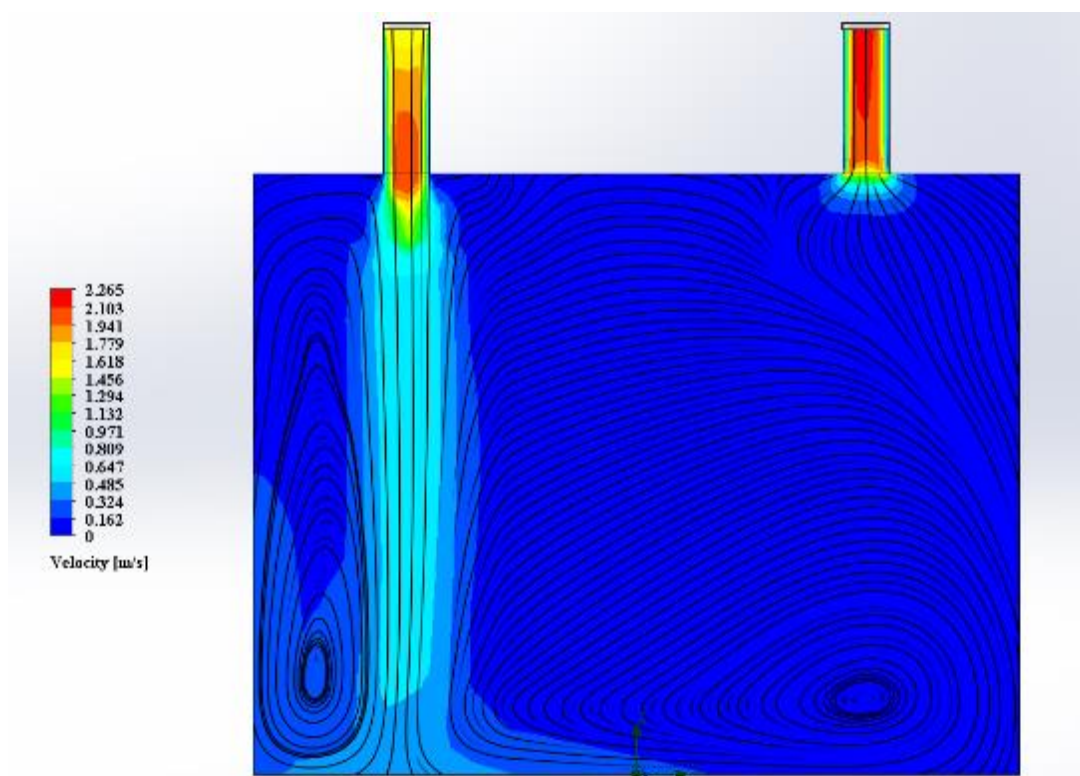

Figure S26. Air velocity in reaction cell and current lines, in run 3, for geometry with air inlet and outlet in the upper region.

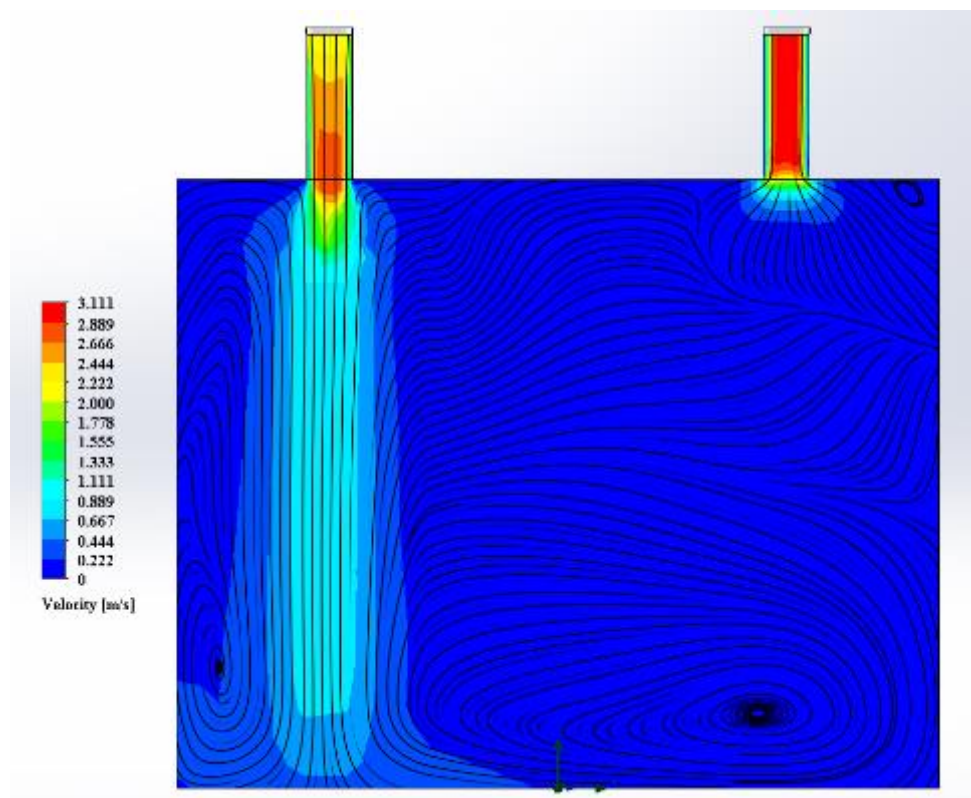

Figure S27. Air velocity in reaction cell and current lines, in run 4, for geometry with air inlet and outlet in the upper region.

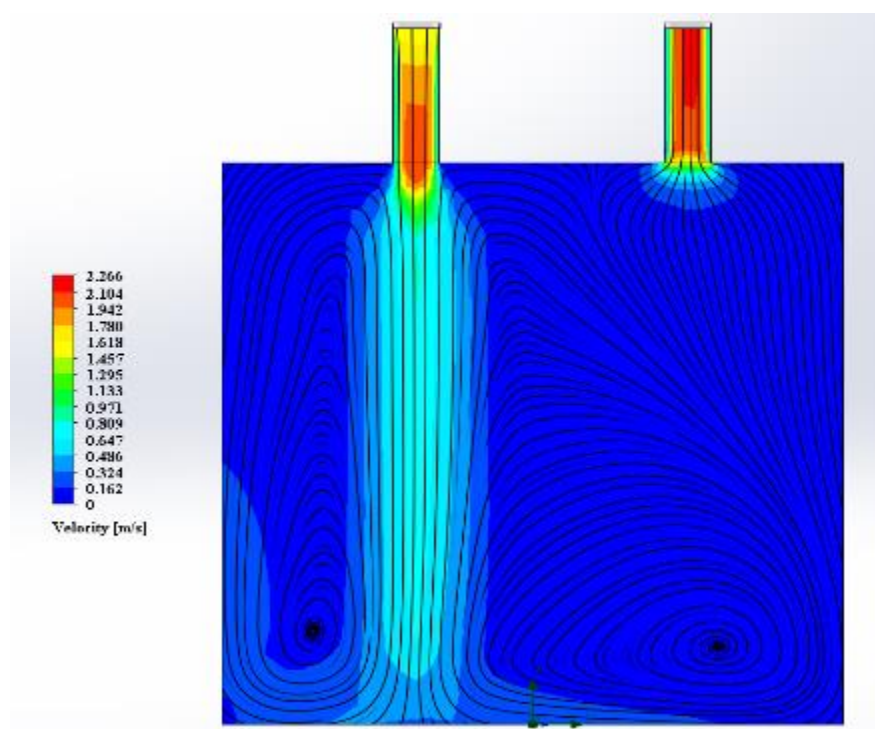

Figure S28. Air velocity in reaction cell and current lines, in run 5, for geometry with air inlet and outlet in the upper region.

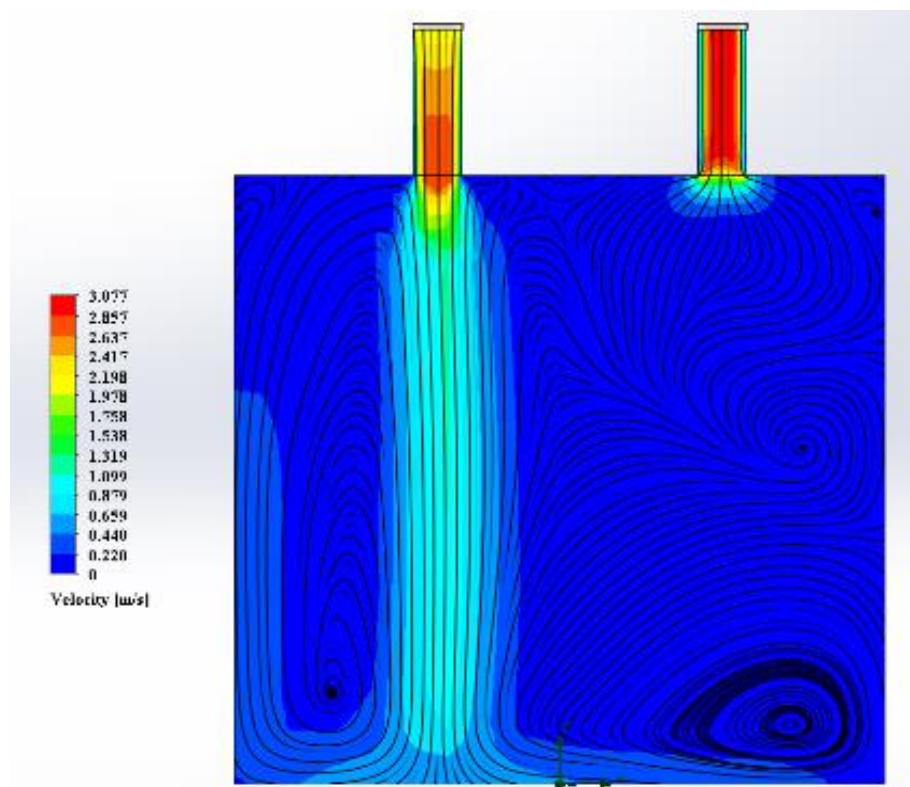

Figure S29. Air velocity in reaction cell and current lines, in run 6, for geometry with air inlet and outlet in the upper region.

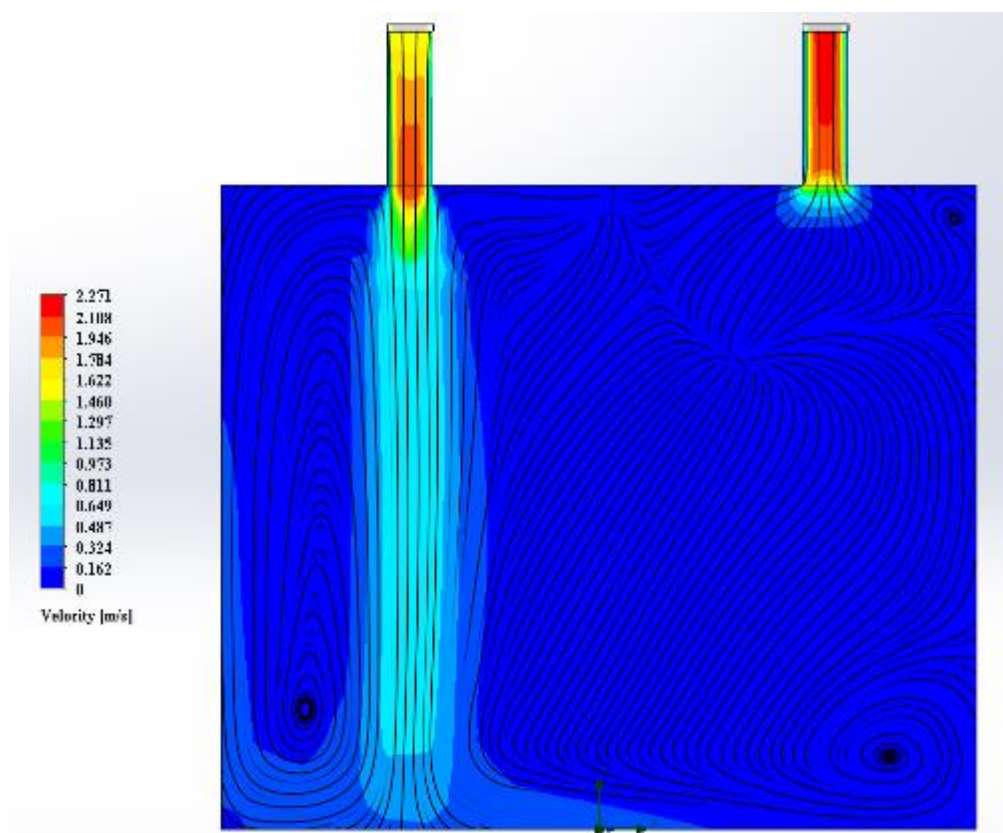

Figure S30. Air velocity in reaction cell and current lines, in run 7, for geometry with air inlet and outlet in the upper region.

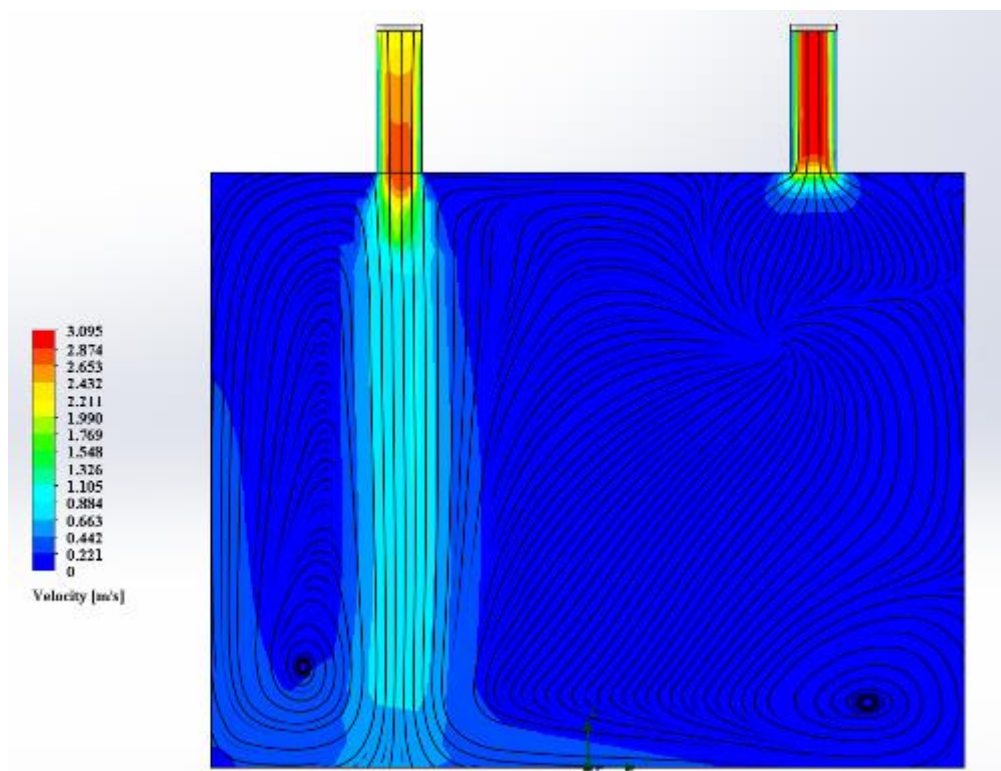

Figure S31. Air velocity in reaction cell and current lines, in run 8, for geometry with air inlet and outlet in the upper region.

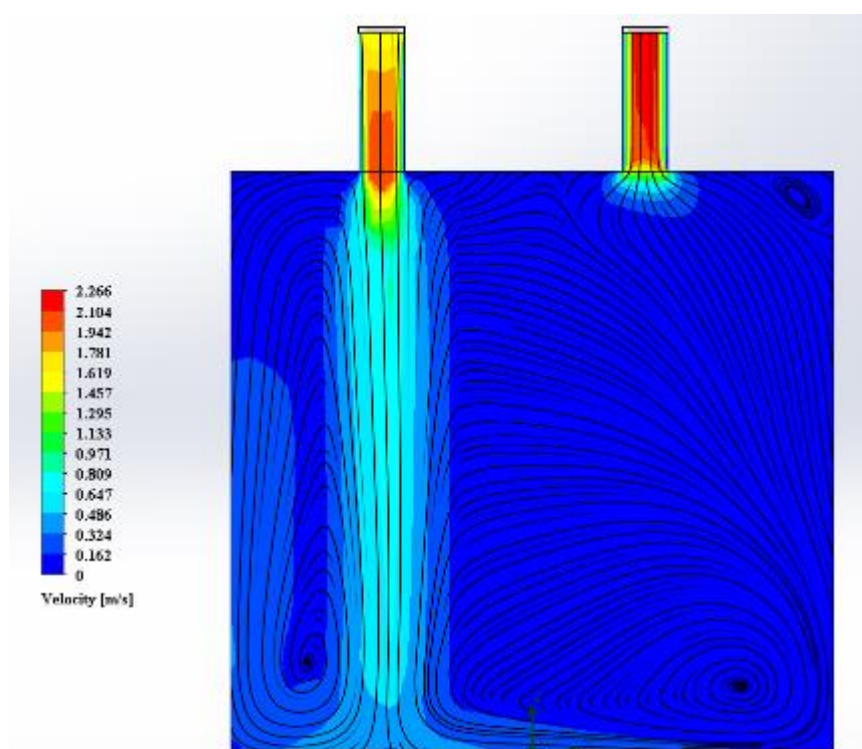

Figure S32. Air velocity in reaction cell and current lines, in run 9, for geometry with air inlet and outlet in the upper region.

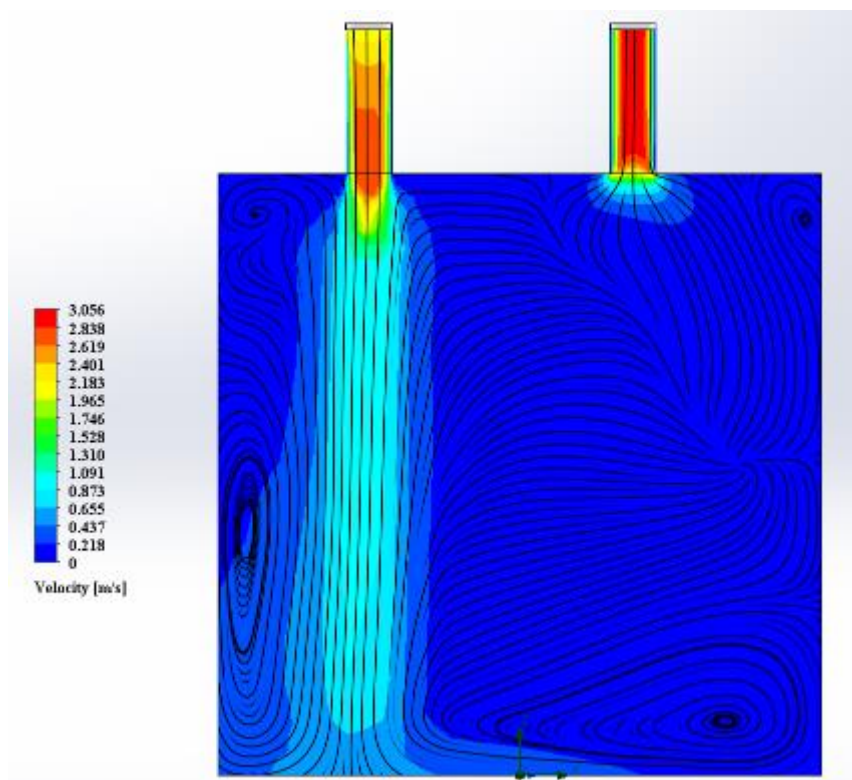

Figure S33. Air velocity in reaction cell and current lines, in run 10, for geometry with air inlet and outlet in the upper region.

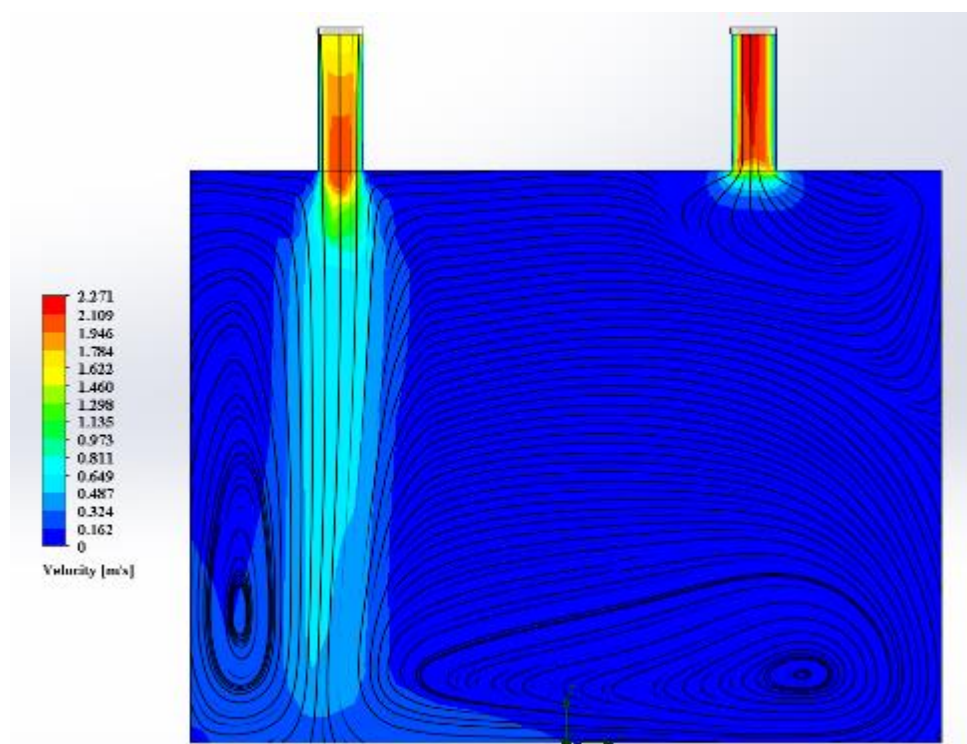

Figure S34. Air velocity in reaction cell and current lines, in run 11, for geometry with air inlet and outlet in the upper region.

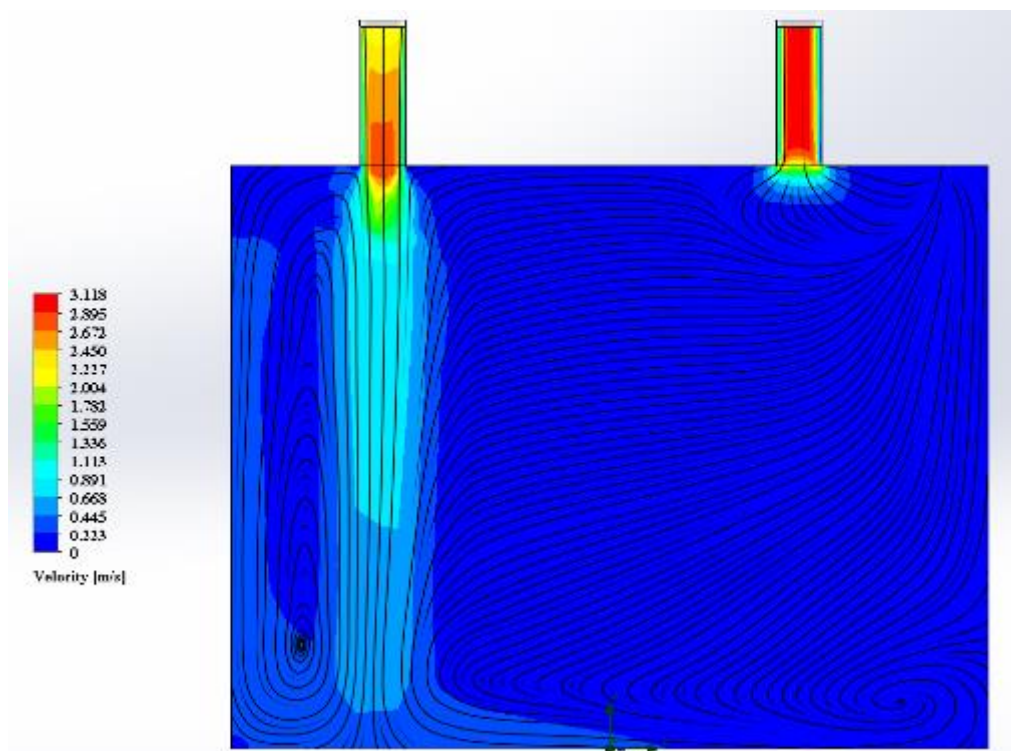

Figure S35. Air velocity in reaction cell and current lines, in run 12, for geometry with air inlet and outlet in the upper region.

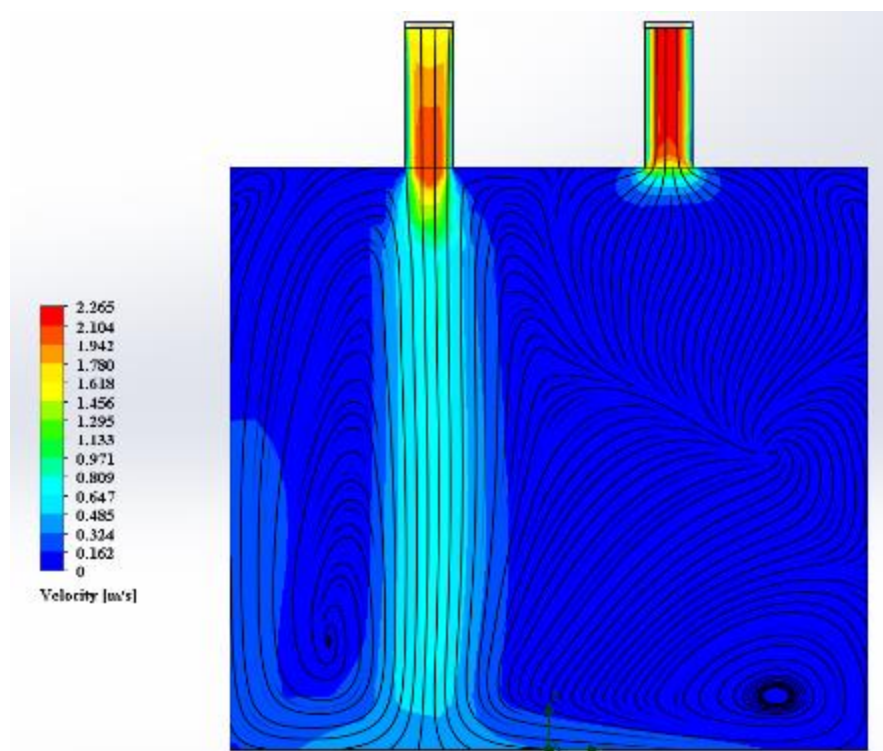

Figure S36. Air velocity in reaction cell and current lines, in run 13, for geometry with air inlet and outlet in the upper region.

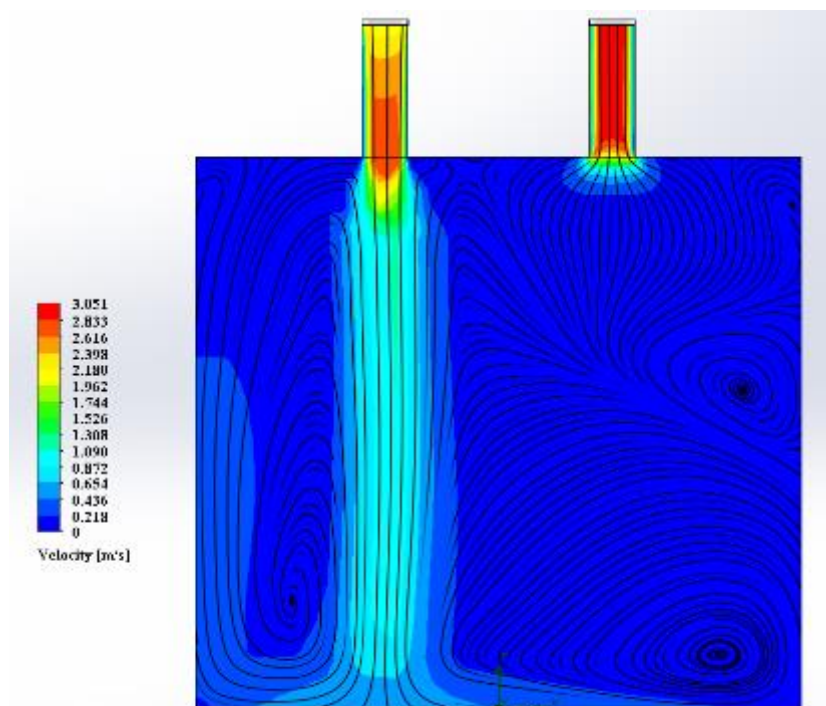

Figure S37. Air velocity in reaction cell and current lines, in run 14, for geometry with air inlet and outlet in the upper region.

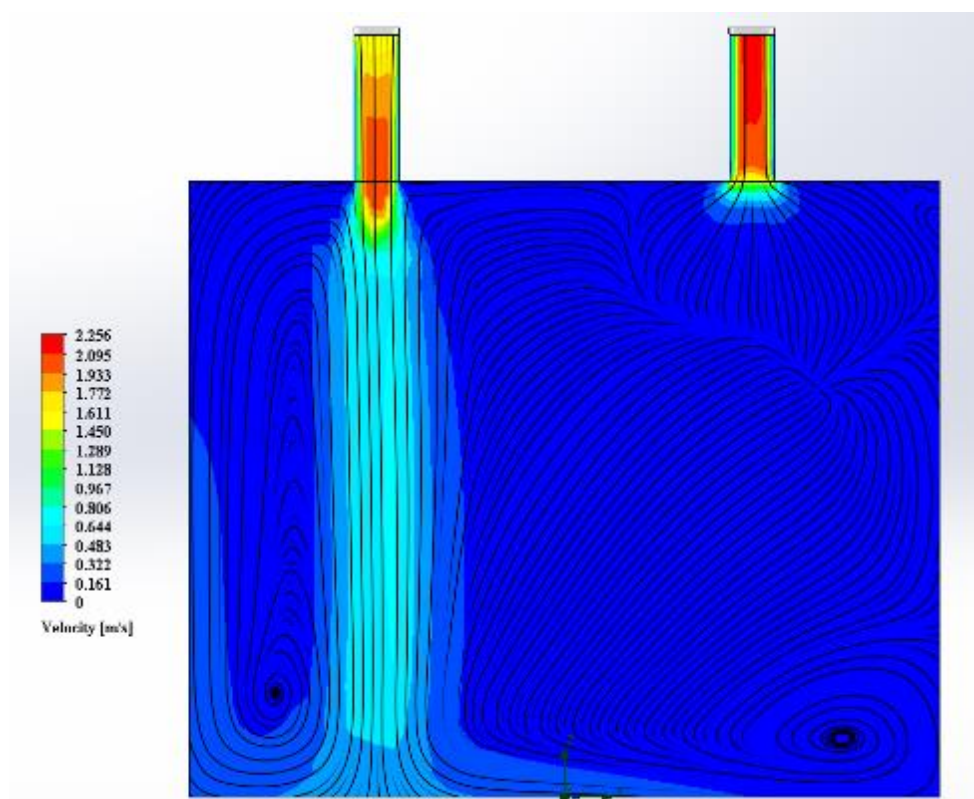

Figure S38. Air velocity in reaction cell and current lines, in run 15, for geometry with air inlet and outlet in the upper region.

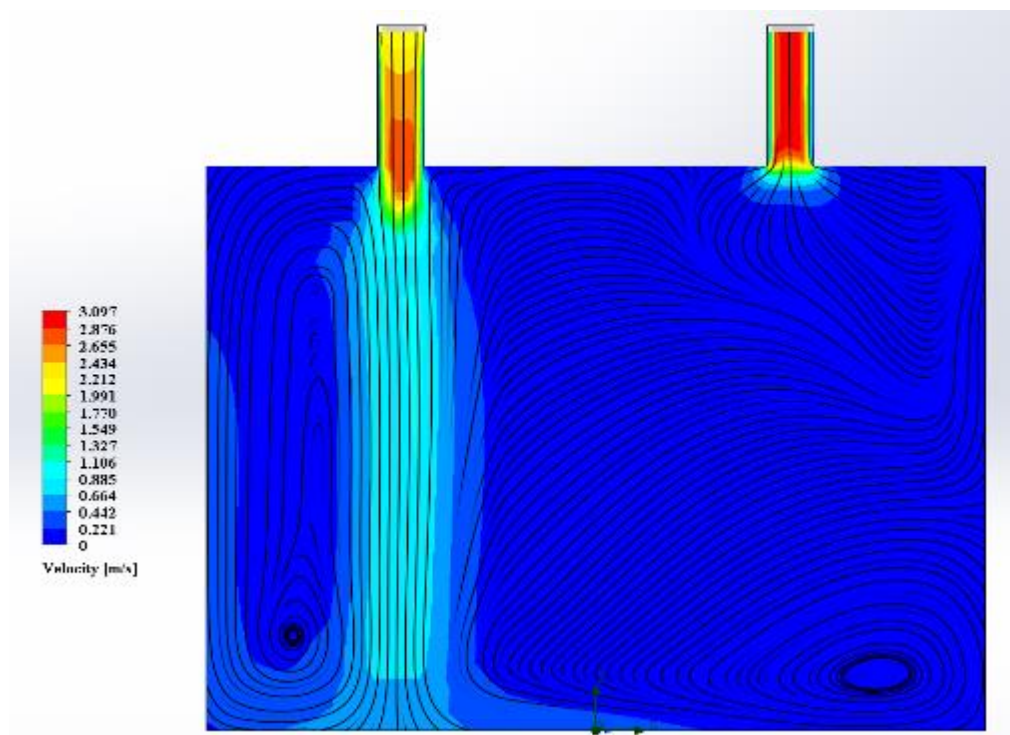

Figure S39. Air velocity in reaction cell and current lines, in run 16, for geometry with air inlet and outlet in the upper region.

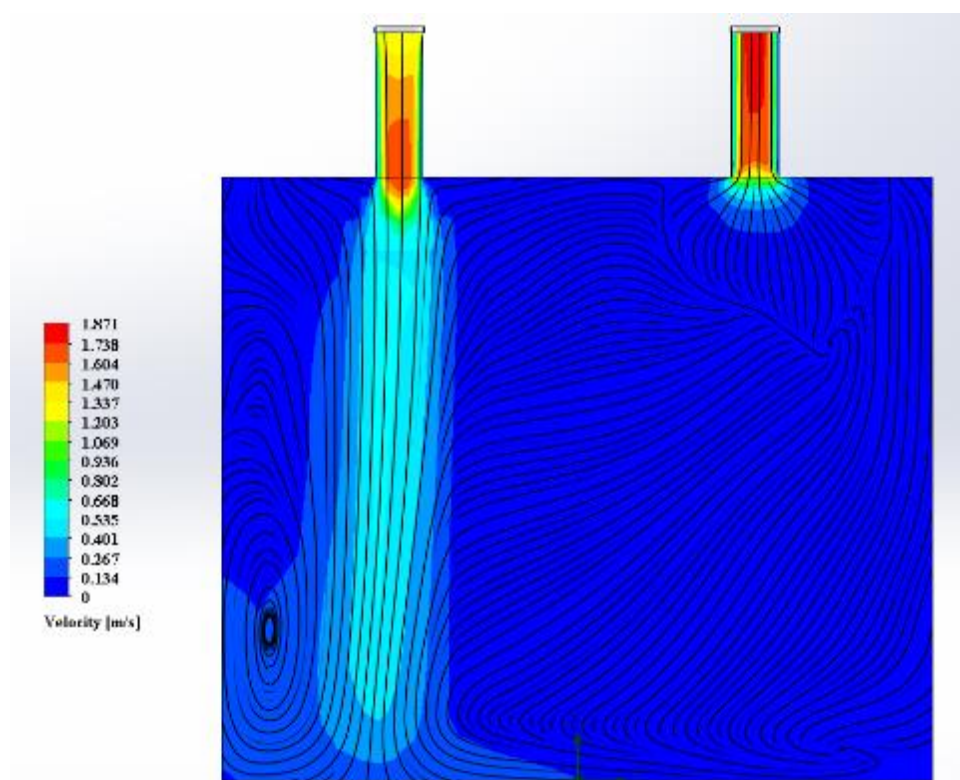

Figure S40. Air velocity in reaction cell and current lines, in run 17, for geometry with air inlet and outlet in the upper region.

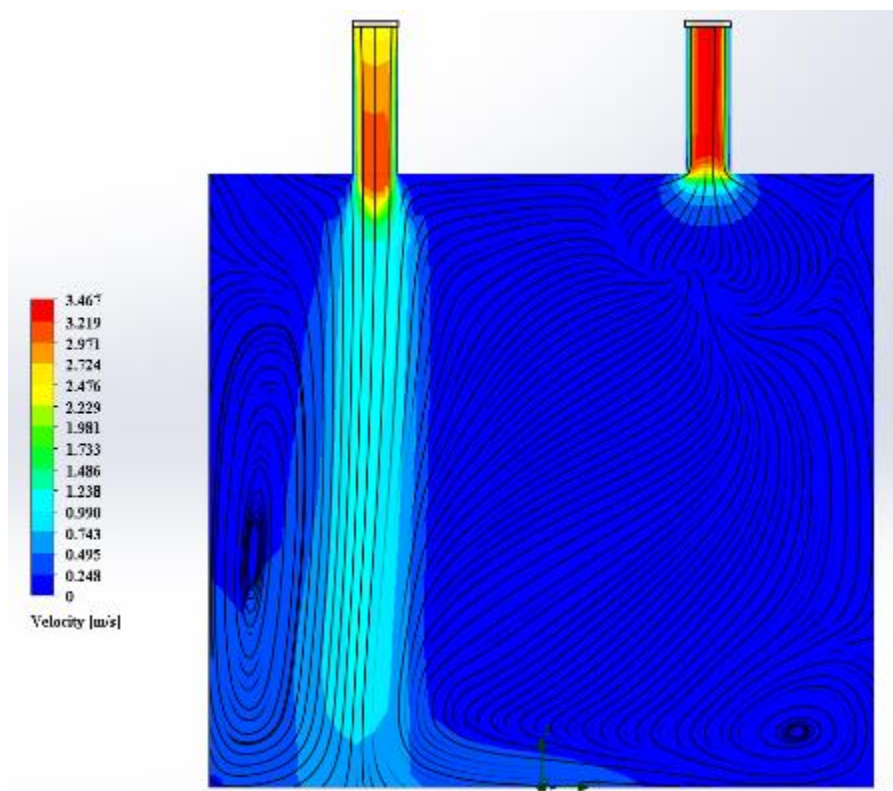

Figure S41. Air velocity in reaction cell and current lines, in run 18, for geometry with air inlet and outlet in the upper region.

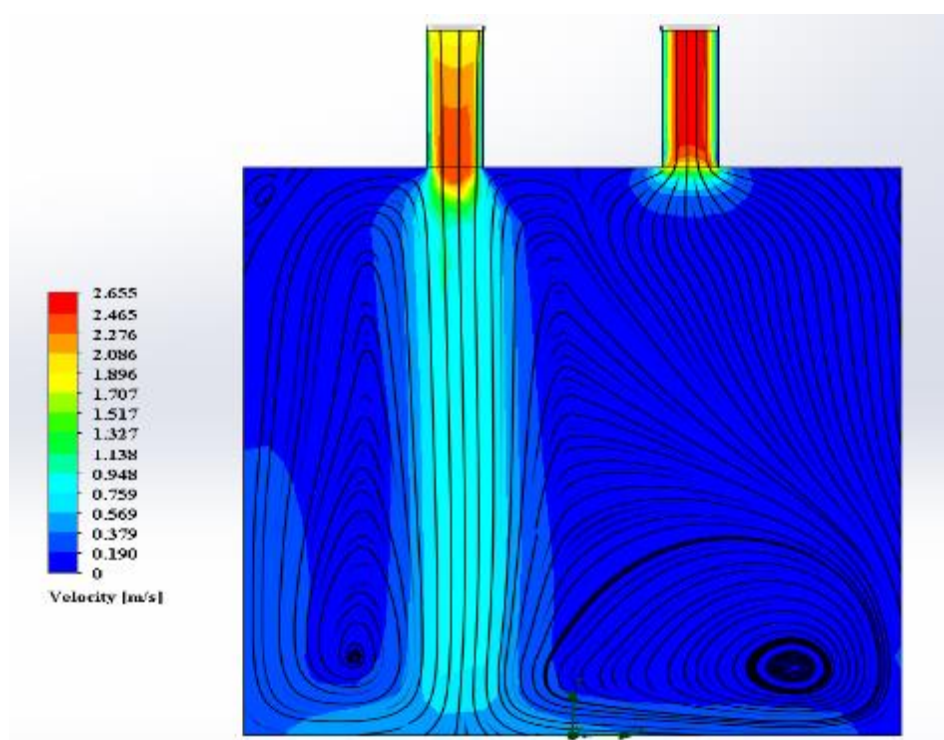

Figure S42. Air velocity in reaction cell and current lines, in run 19, for geometry with air inlet and outlet in the upper region.

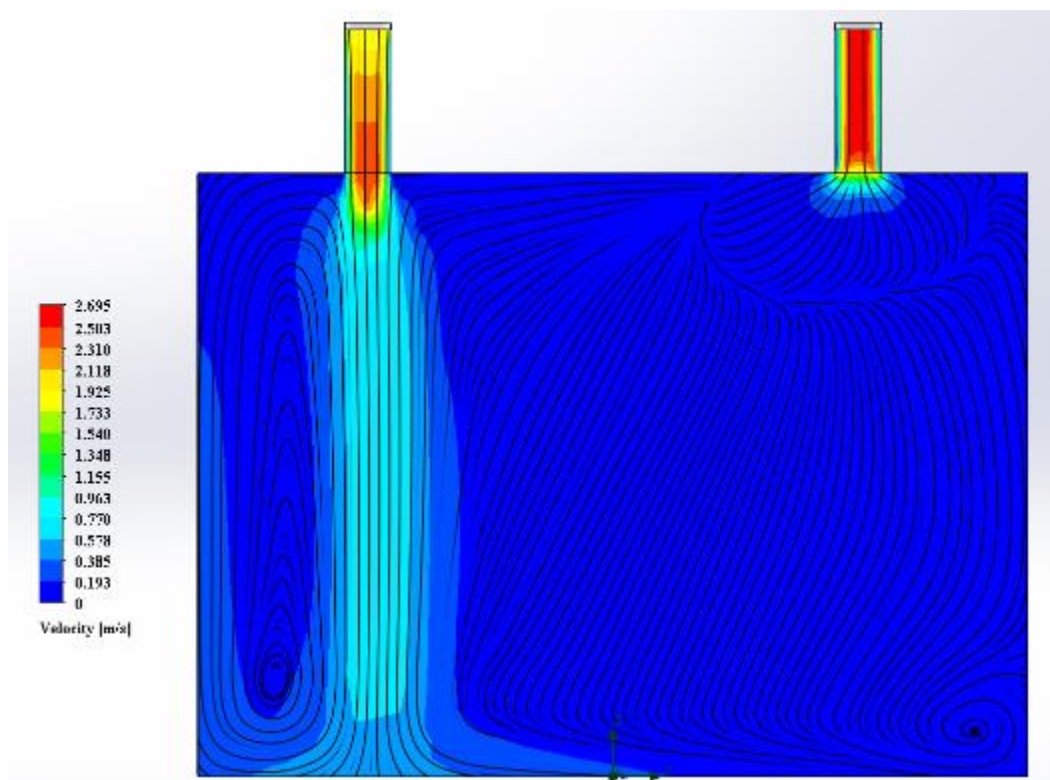

Figure S43. Air velocity in reaction cell and current lines, in run 20, for geometry with air inlet and outlet in the upper region.

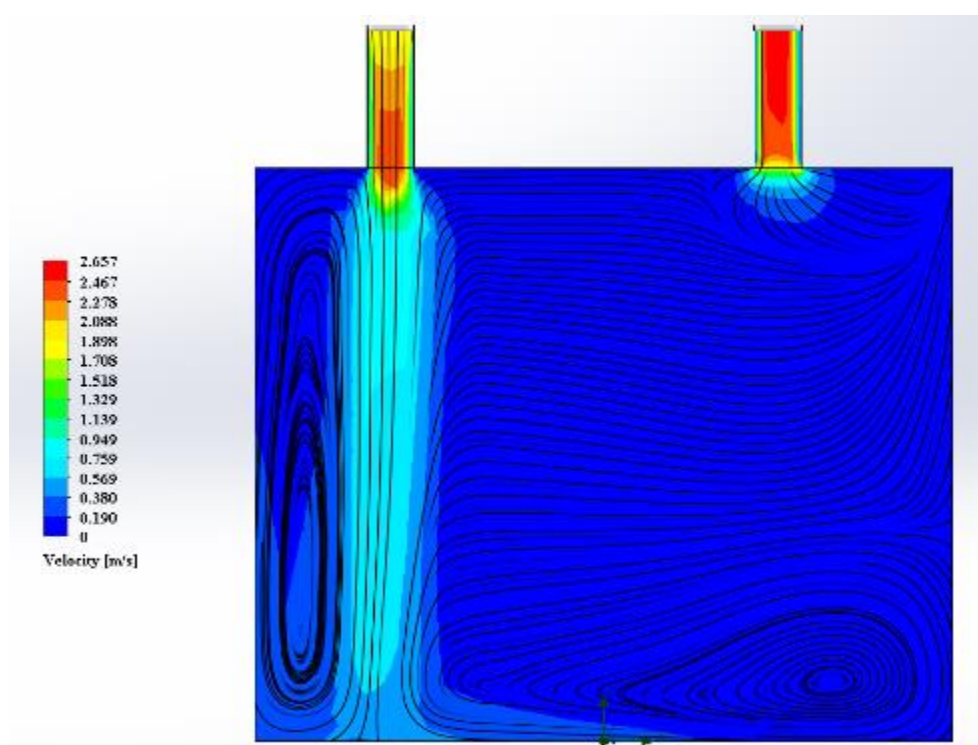

Figure S44. Air velocity in reaction cell and current lines, in run 21, for geometry with air inlet and outlet in the upper region.

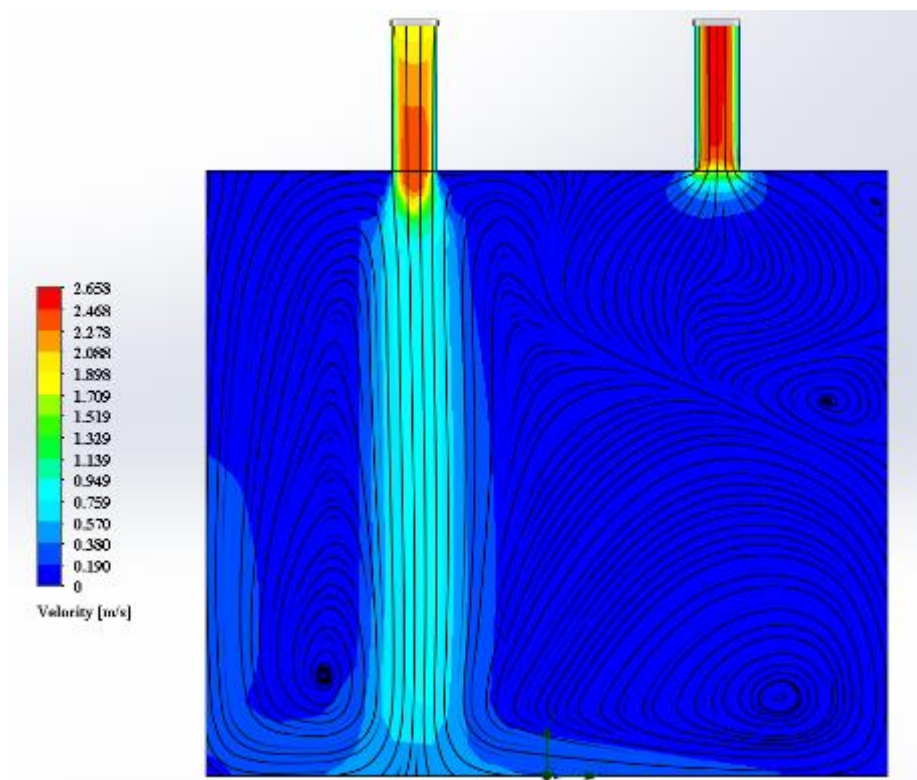

Figure S45. Air velocity in reaction cell and current lines, in run 22, for geometry with air inlet and outlet in the upper region.

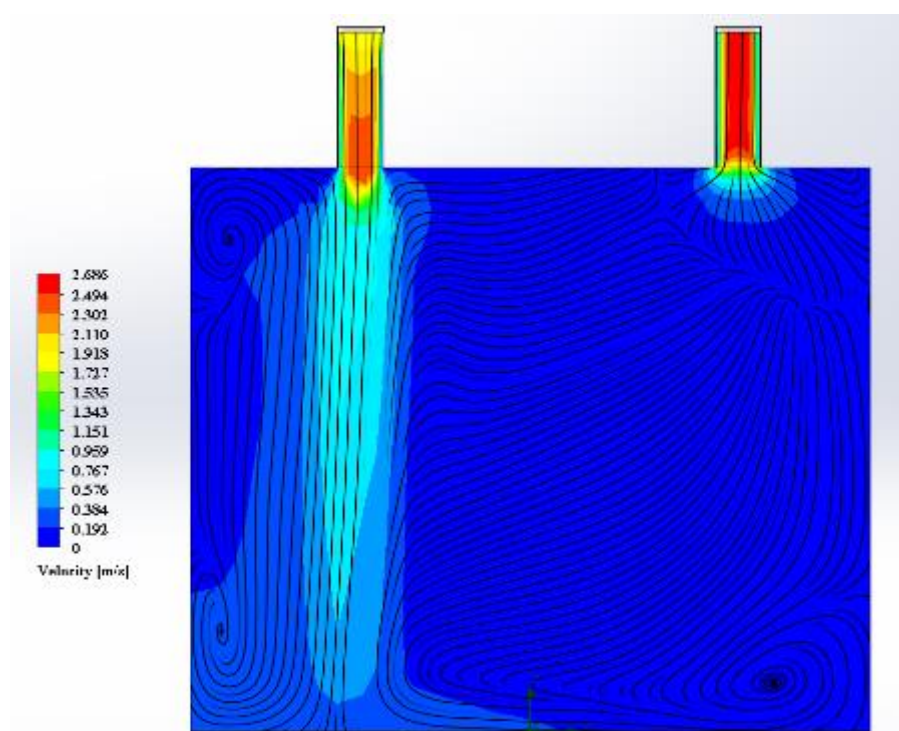

Figure S246. Air velocity in reaction cell and current lines, in run 23, for geometry with air inlet and outlet in the upper region.

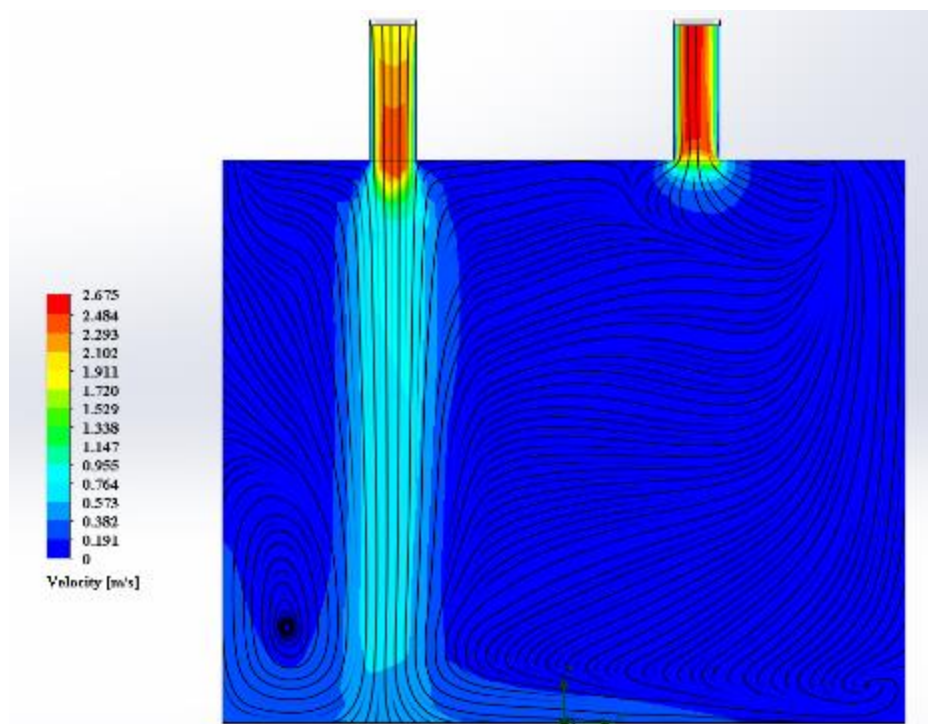

Figure S47. Air velocity in reaction cell and current lines, in run 24, for geometry with air inlet and outlet in the upper region.

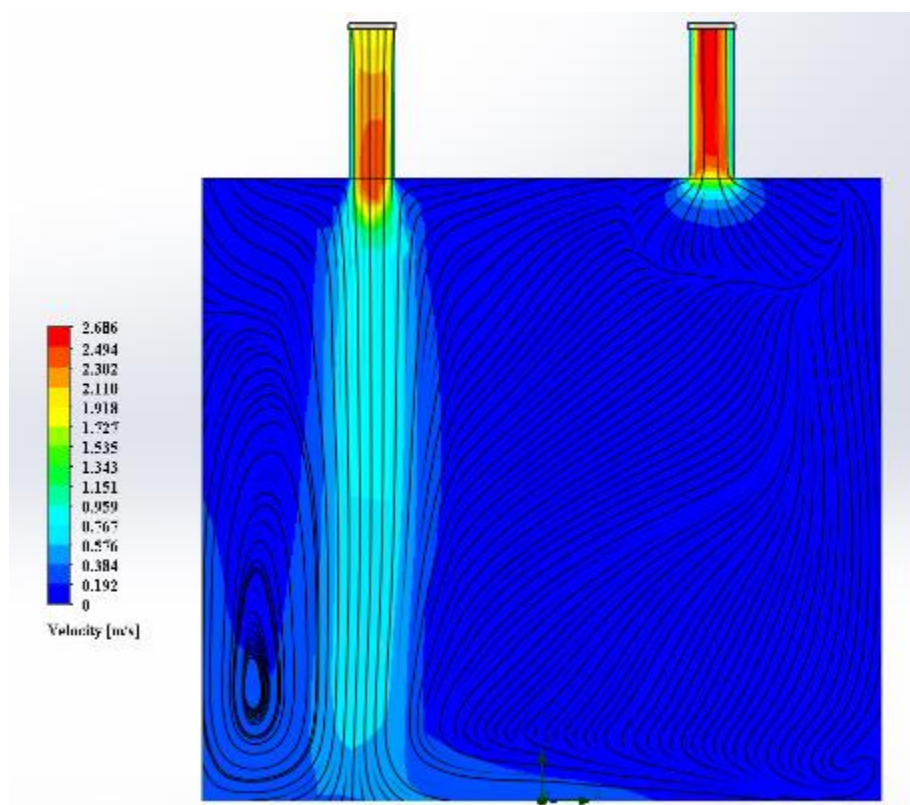

Figure S48. Air velocity in reaction cell and current lines, in run 25, for geometry with air inlet and outlet in the upper region.

- Internal pressure in the reaction cell and the current lines.

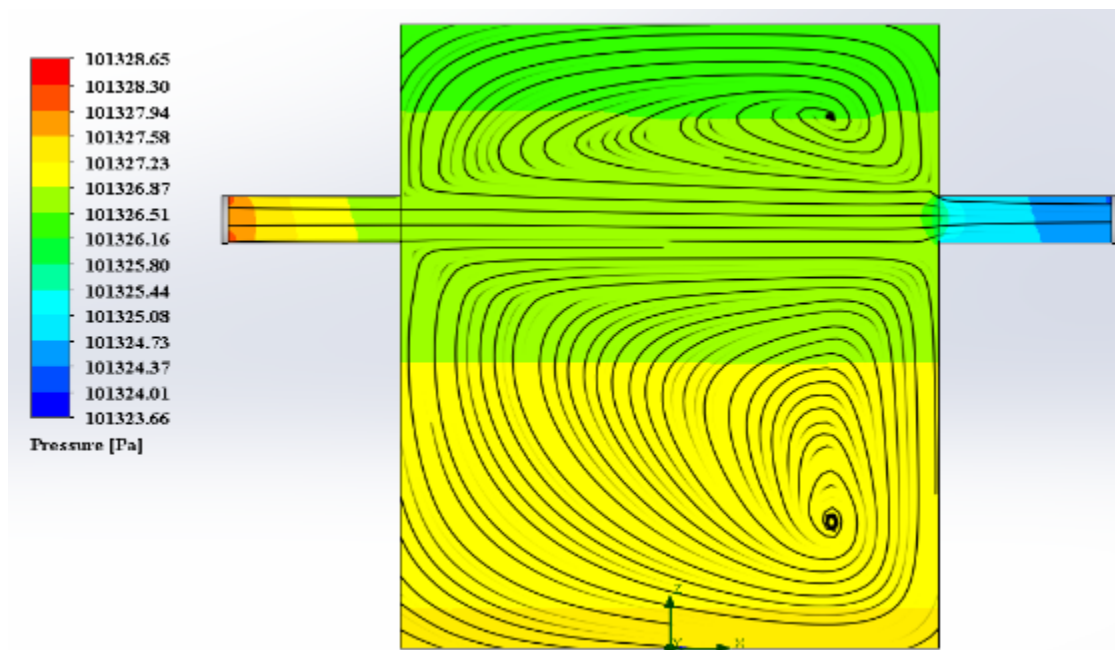

Figure S49. Internal pressure in the reaction cell and current lines, in run 2, for the geometry with lateral air inlet and outlet.

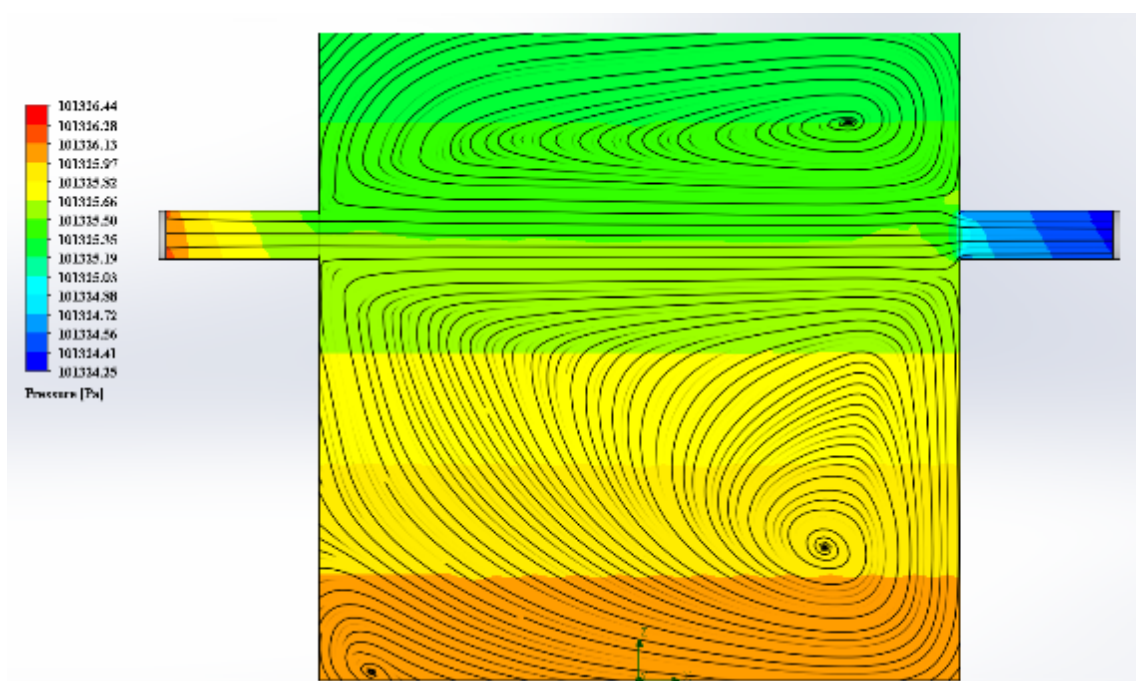

Figure S50. Internal pressure in the reaction cell and current lines, in run 3, for the geometry with lateral air inlet and outlet.

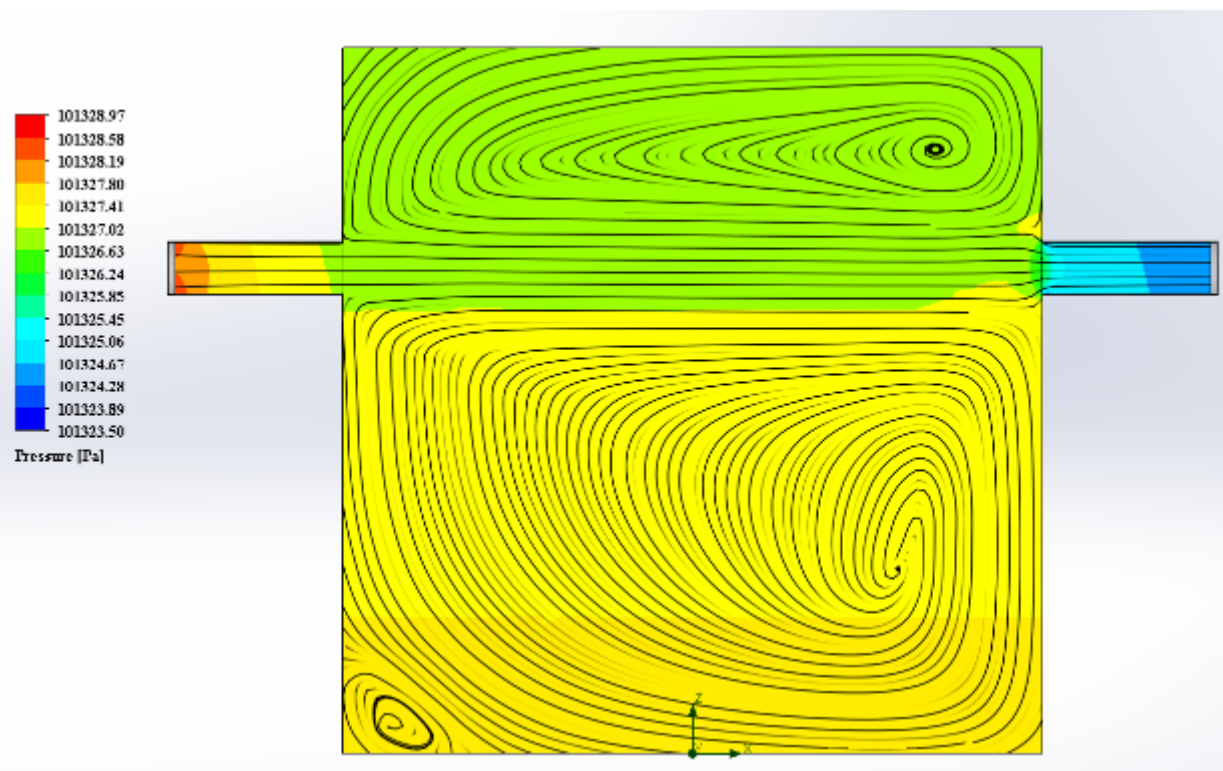

Figure S51. Internal pressure in the reaction cell and current lines, in run 4, for the geometry with lateral air inlet and outlet.

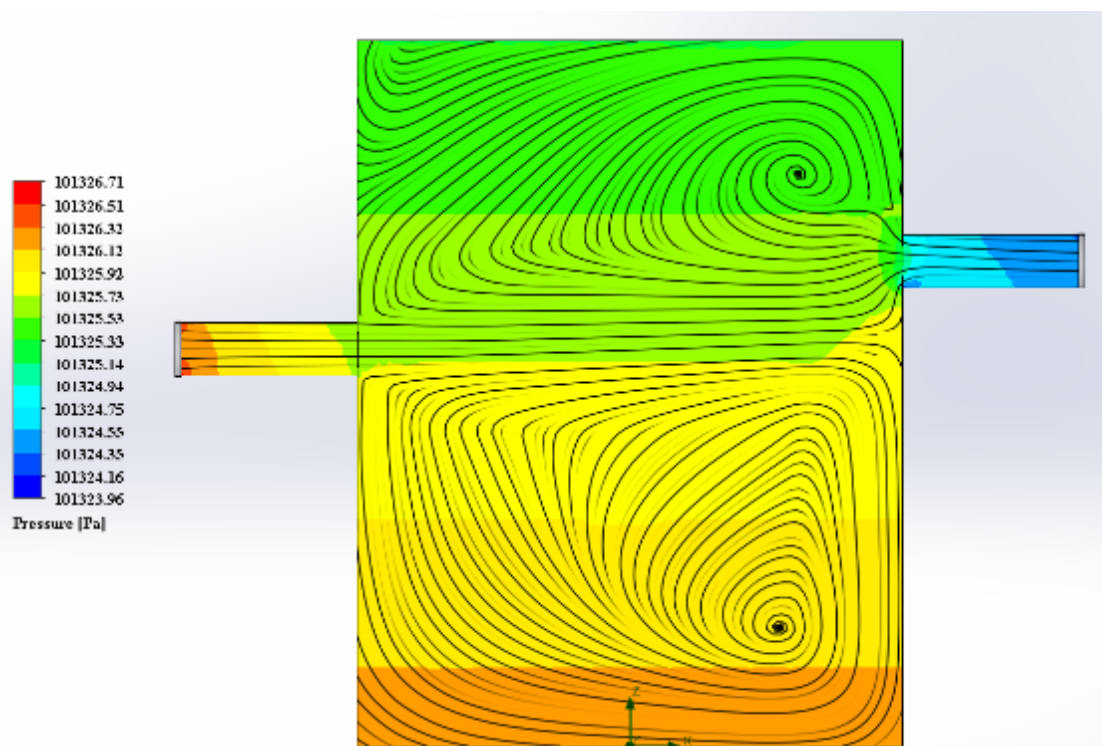

Figure S52. Internal pressure in the reaction cell and current lines, in run 5, for the geometry with lateral air inlet and outlet.

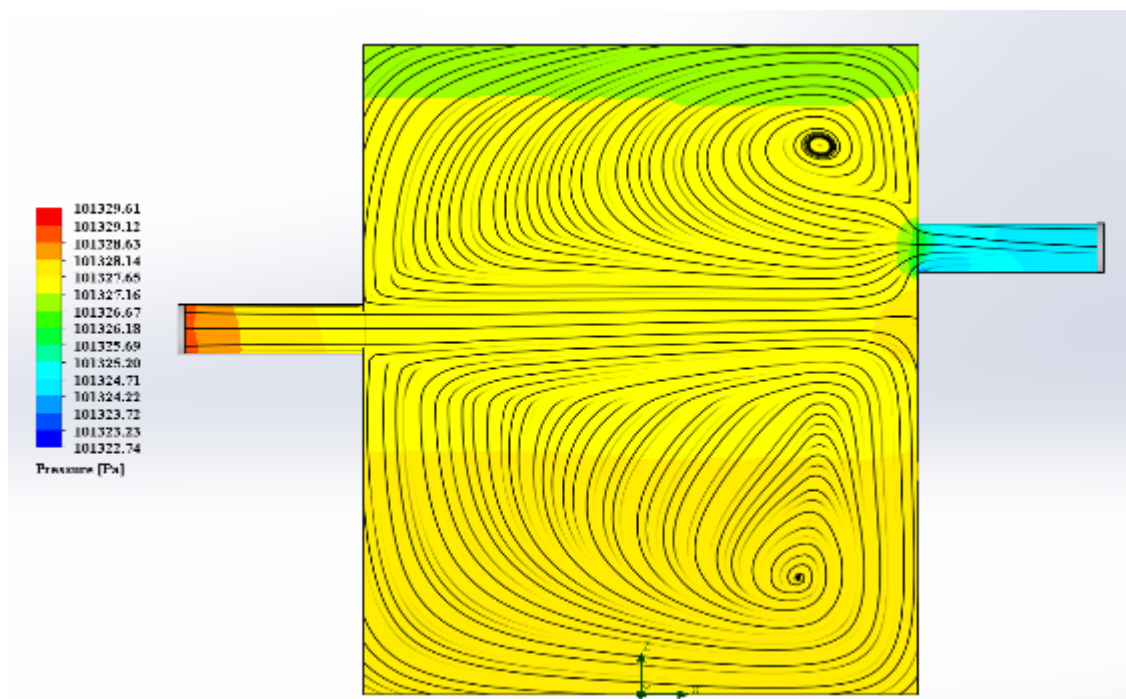

Figure S53. Internal pressure in the reaction cell and current lines, in run 6, for the geometry with lateral air inlet and outlet.

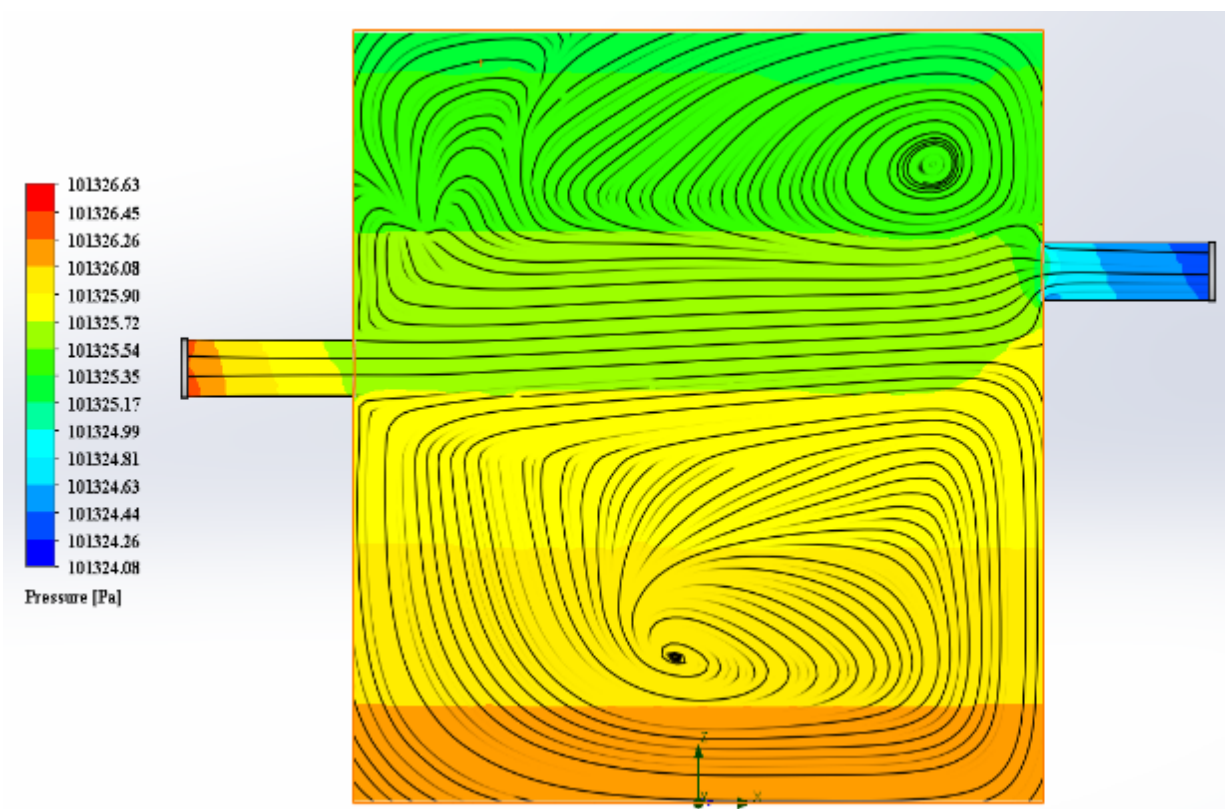

Figure S54. Internal pressure in the reaction cell and current lines, in run 7, for the geometry with lateral air inlet and outlet.

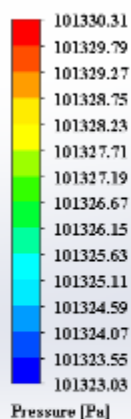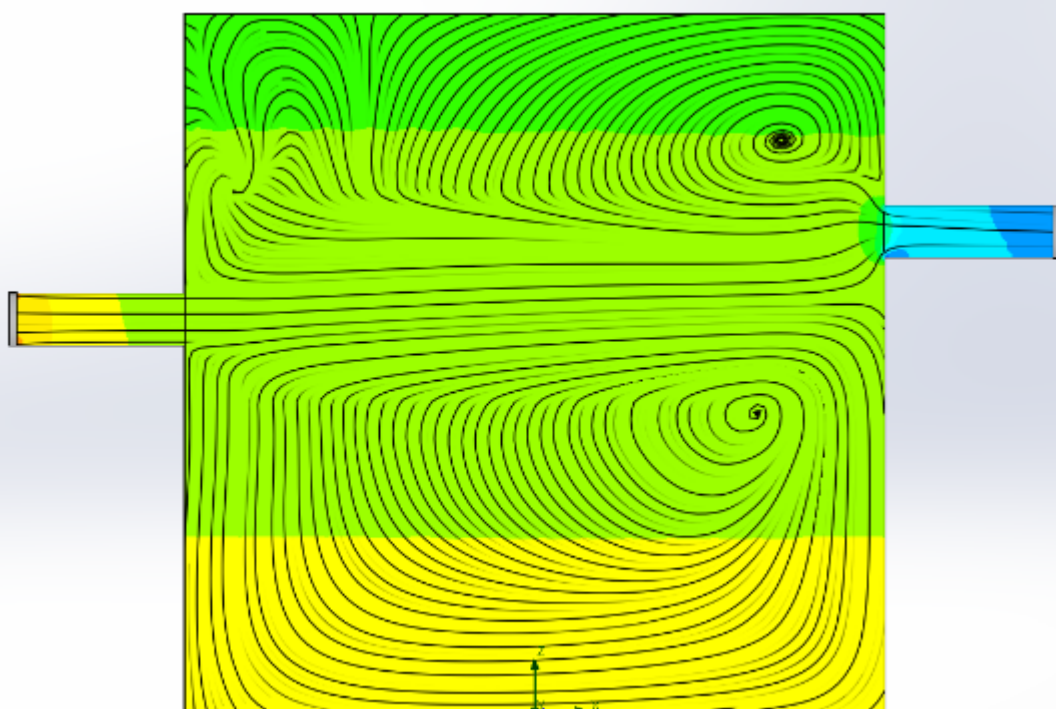

Figure S55. Internal pressure in the reaction cell and current lines, in run 8, for the geometry with lateral air inlet and outlet.

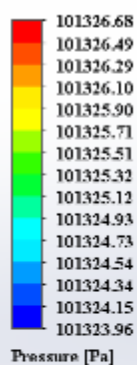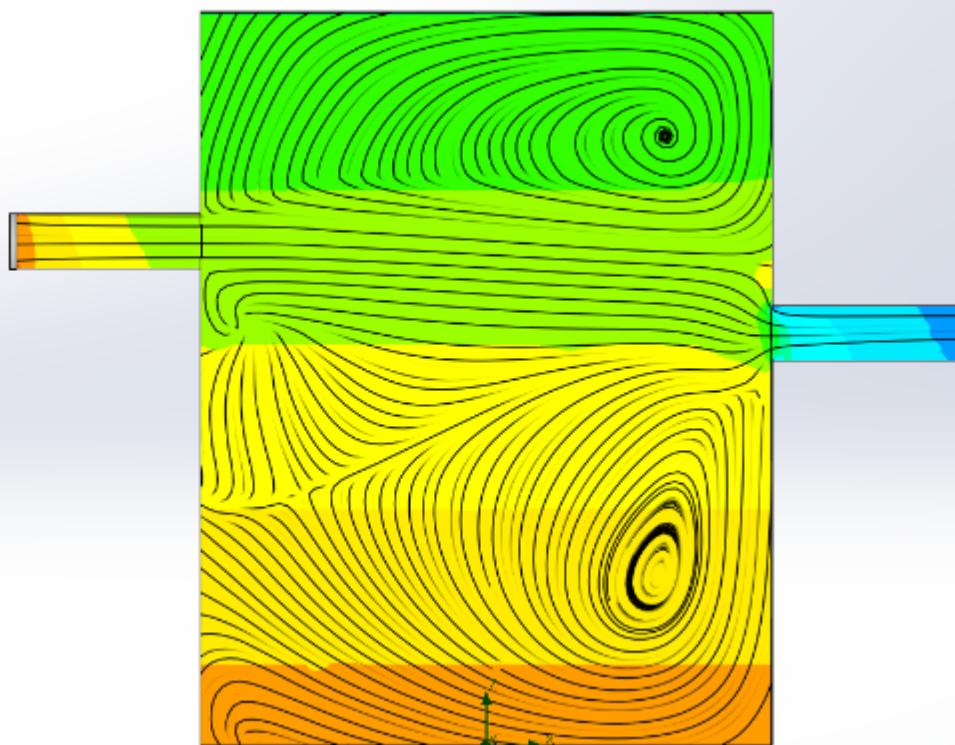

Figure S56. Internal pressure in the reaction cell and current lines, in run 9, for the geometry with lateral air inlet and outlet.

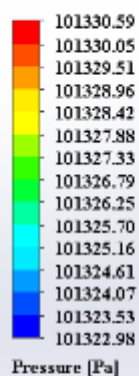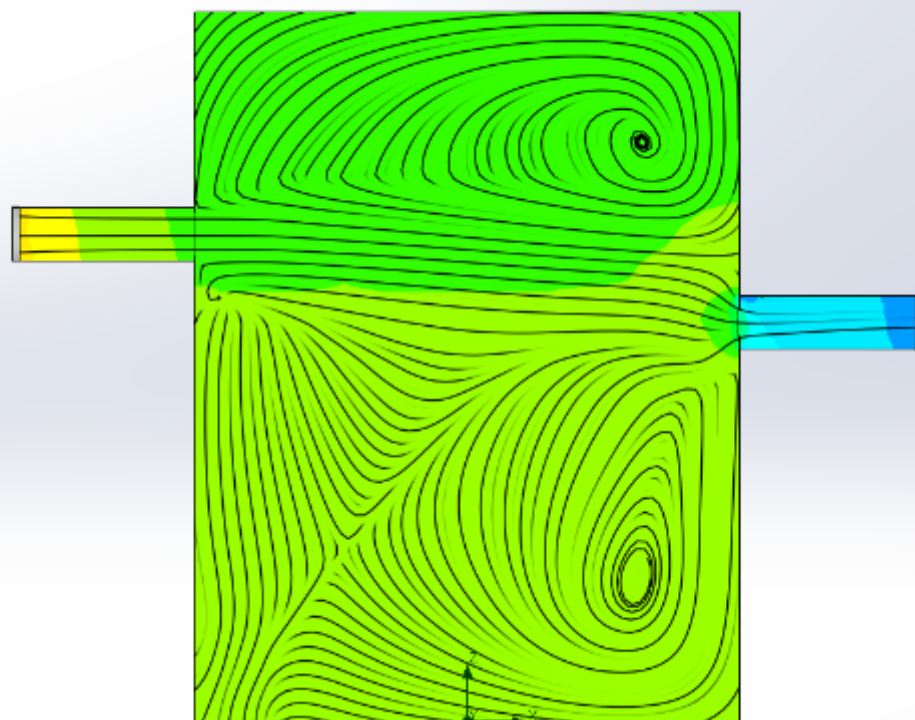

Figure S57. Internal pressure in the reaction cell and current lines, in run 10, for the geometry with lateral air inlet and outlet.

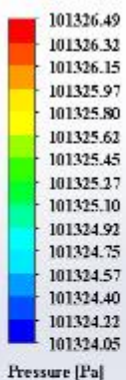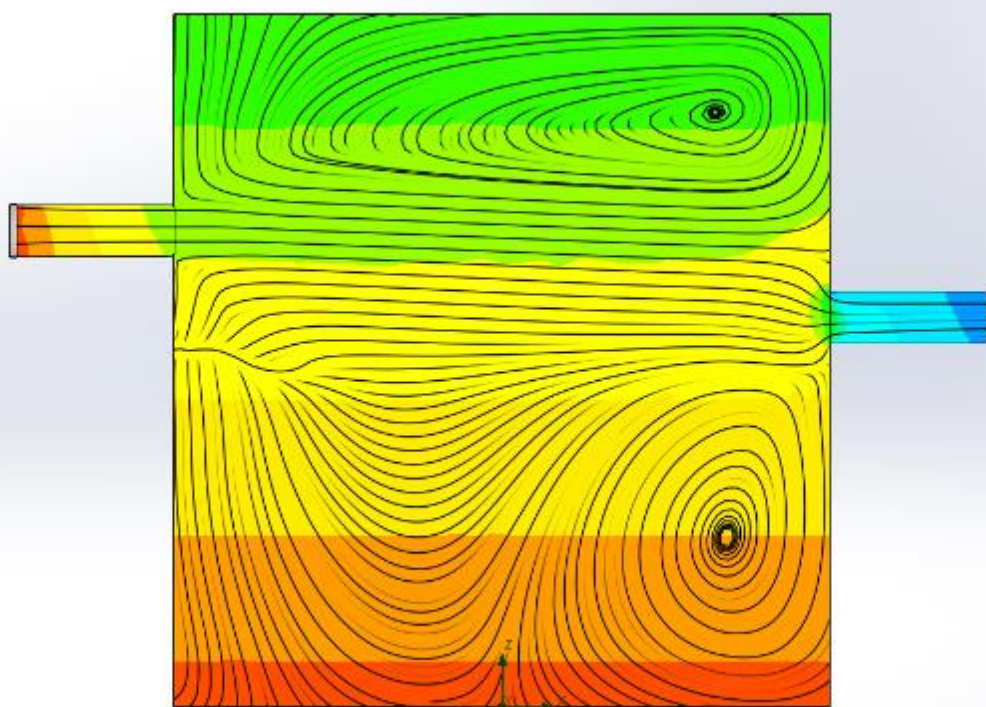

Figure S58. Internal pressure in the reaction cell and current lines, in run 11, for the geometry with lateral air inlet and outlet.

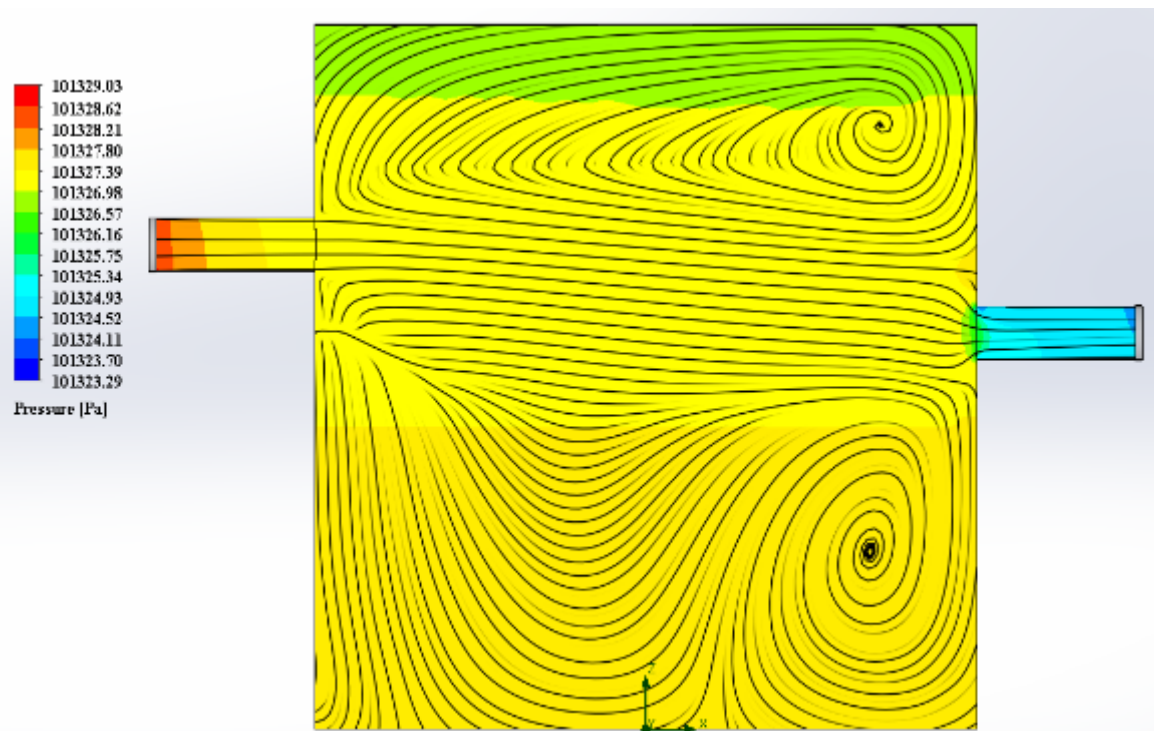

Figure S59. Internal pressure in the reaction cell and current lines, in run 12, for the geometry with lateral air inlet and outlet.

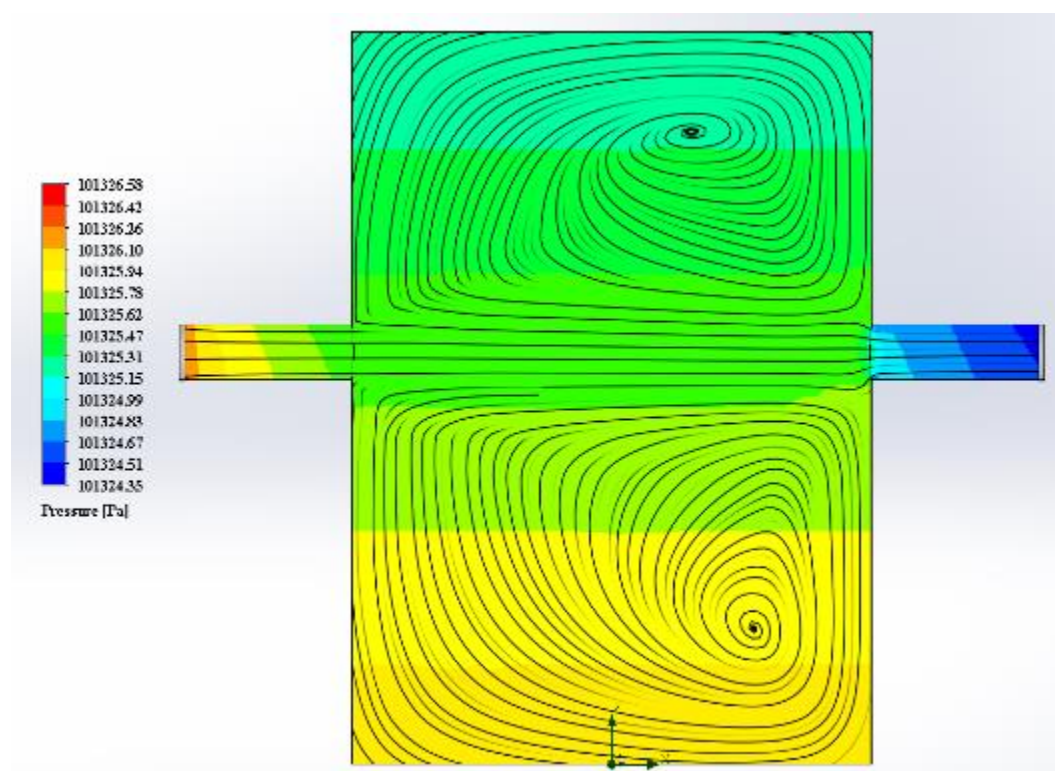

Figure S60. Internal pressure in the reaction cell and current lines, in run 13, for the geometry with lateral air inlet and outlet.

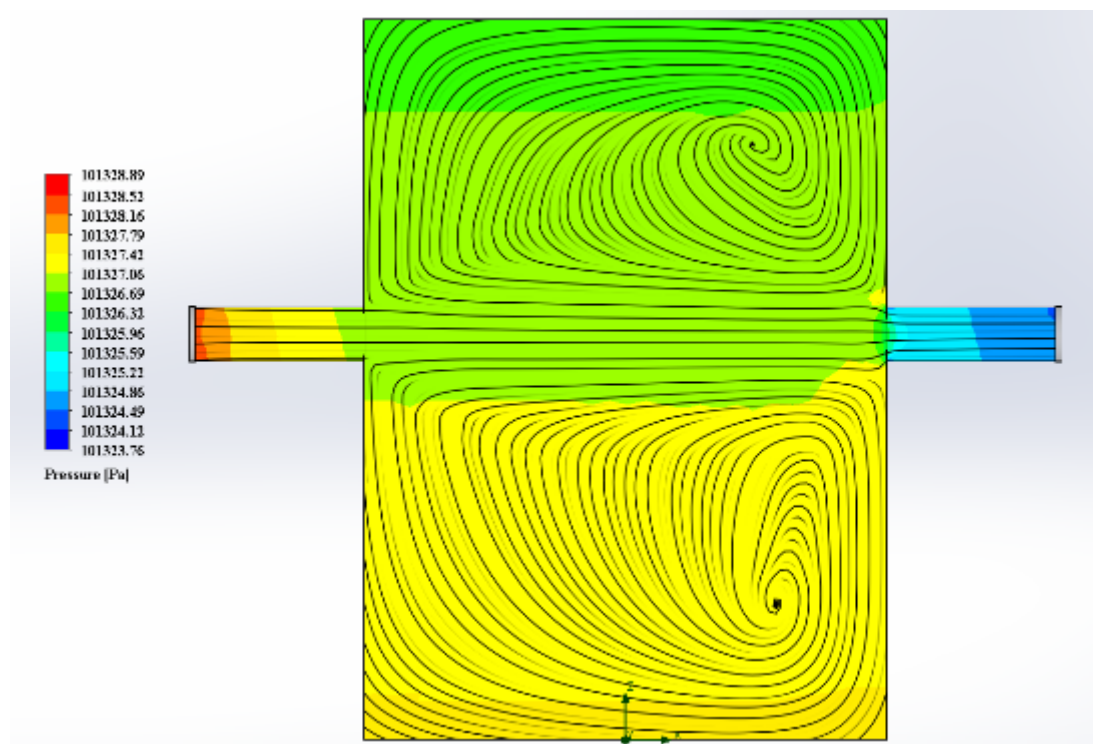

Figure S61. Internal pressure in the reaction cell and current lines, in run 14, for the geometry with lateral air inlet and outlet.

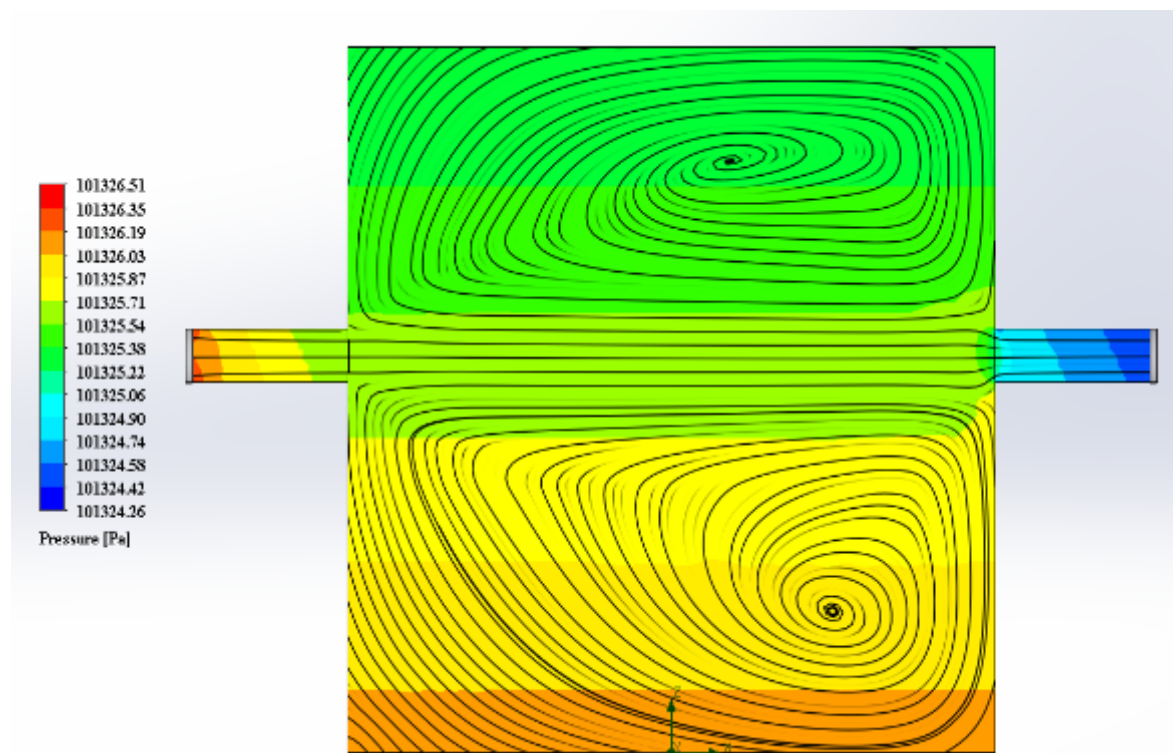

Figure S62. Internal pressure in the reaction cell and current lines, in run 15, for the geometry with lateral air inlet and outlet.

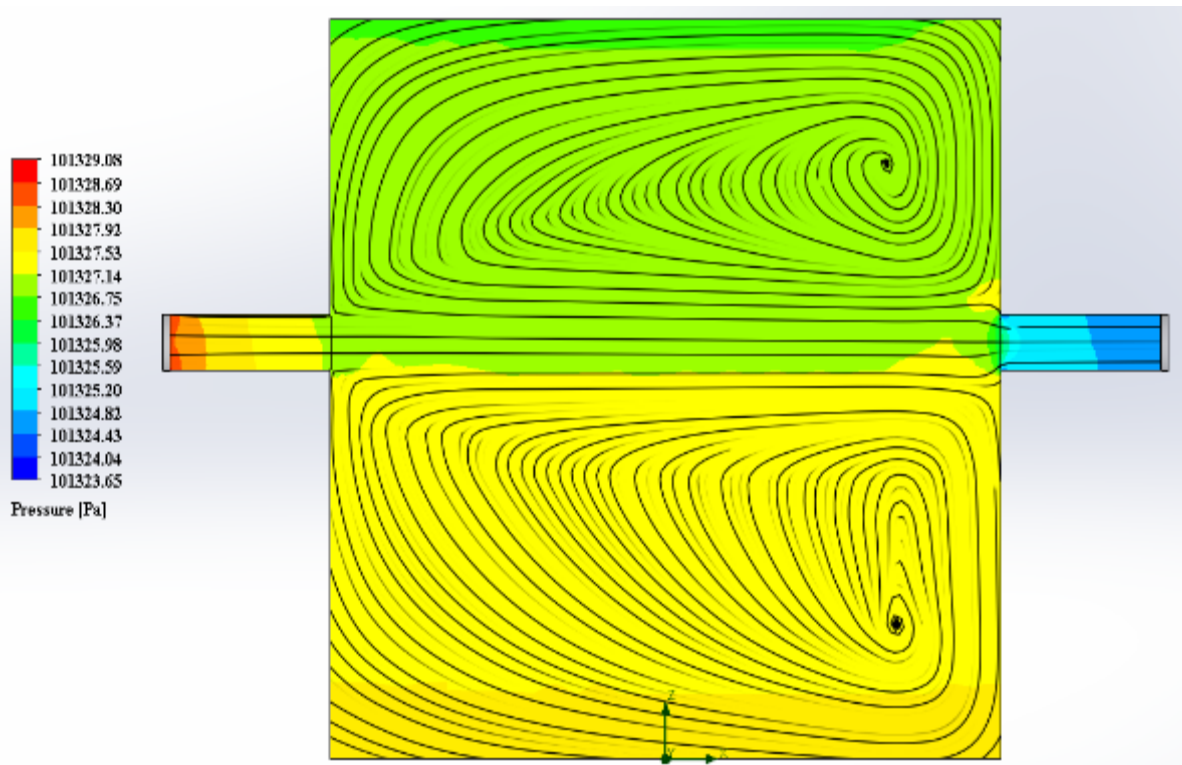

Figure S63. Internal pressure in the reaction cell and current lines, in run 16, for the geometry with lateral air inlet and outlet.

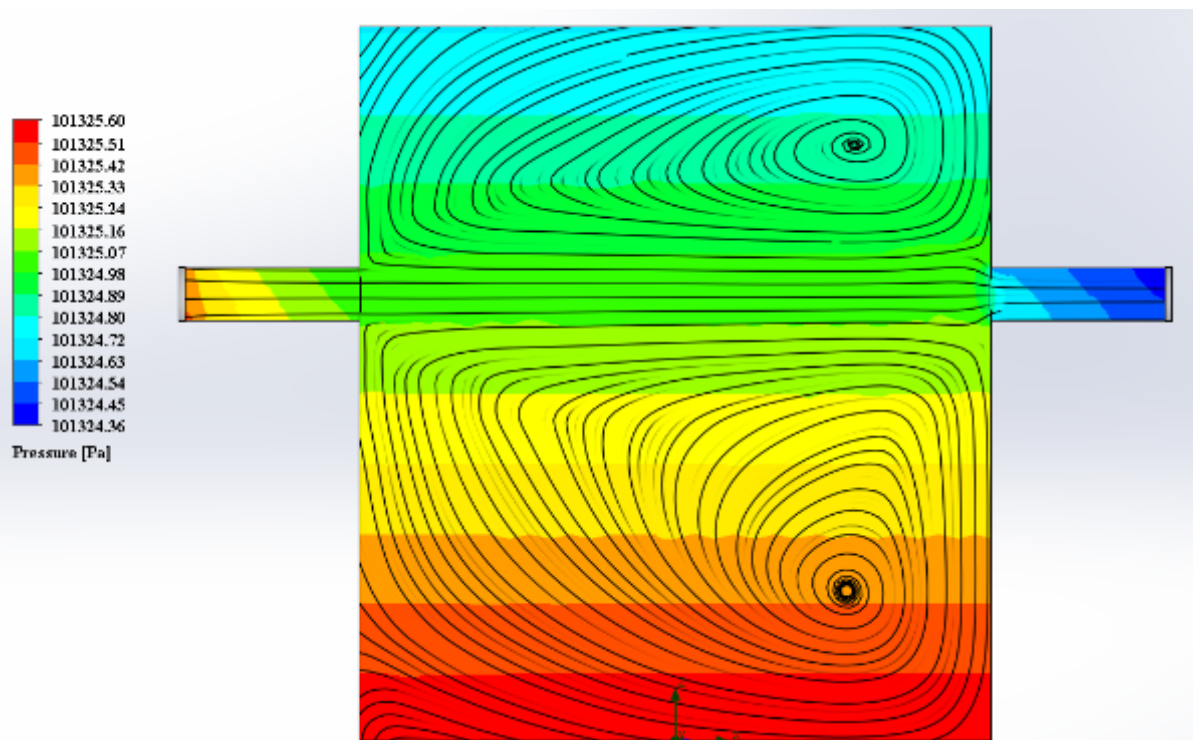

Figure S64. Internal pressure in the reaction cell and current lines, in run 17, for the geometry with lateral air inlet and outlet.

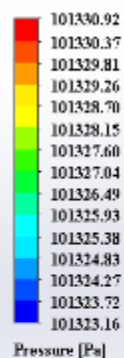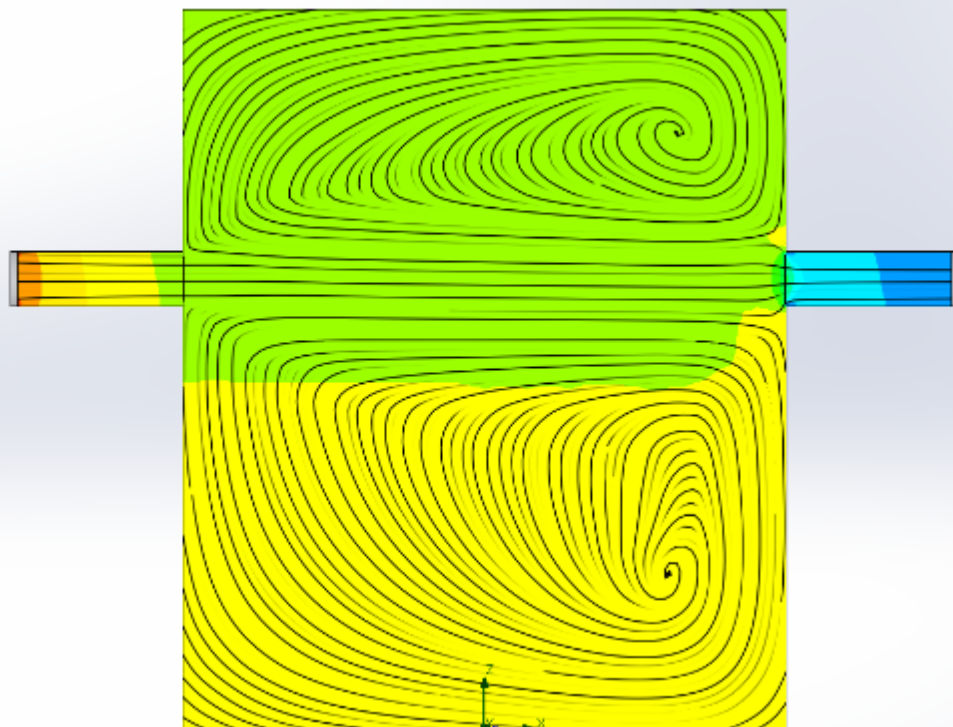

Figure S65. Internal pressure in the reaction cell and current lines, in run 18, for the geometry with lateral air inlet and outlet.

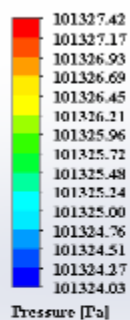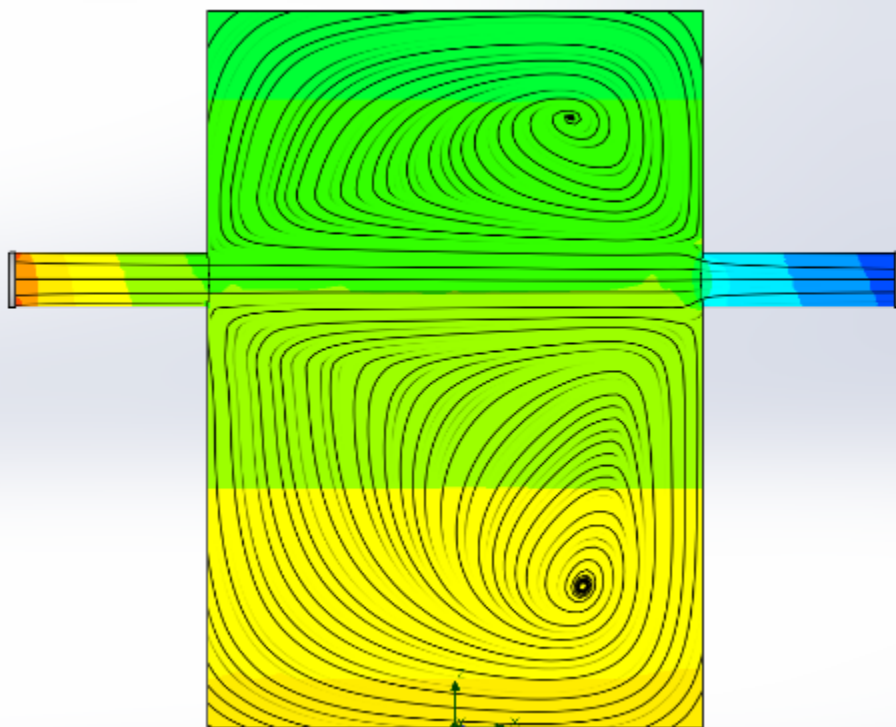

Figure S66. Internal pressure in the reaction cell and current lines, in run 19, for the geometry with lateral air inlet and outlet.

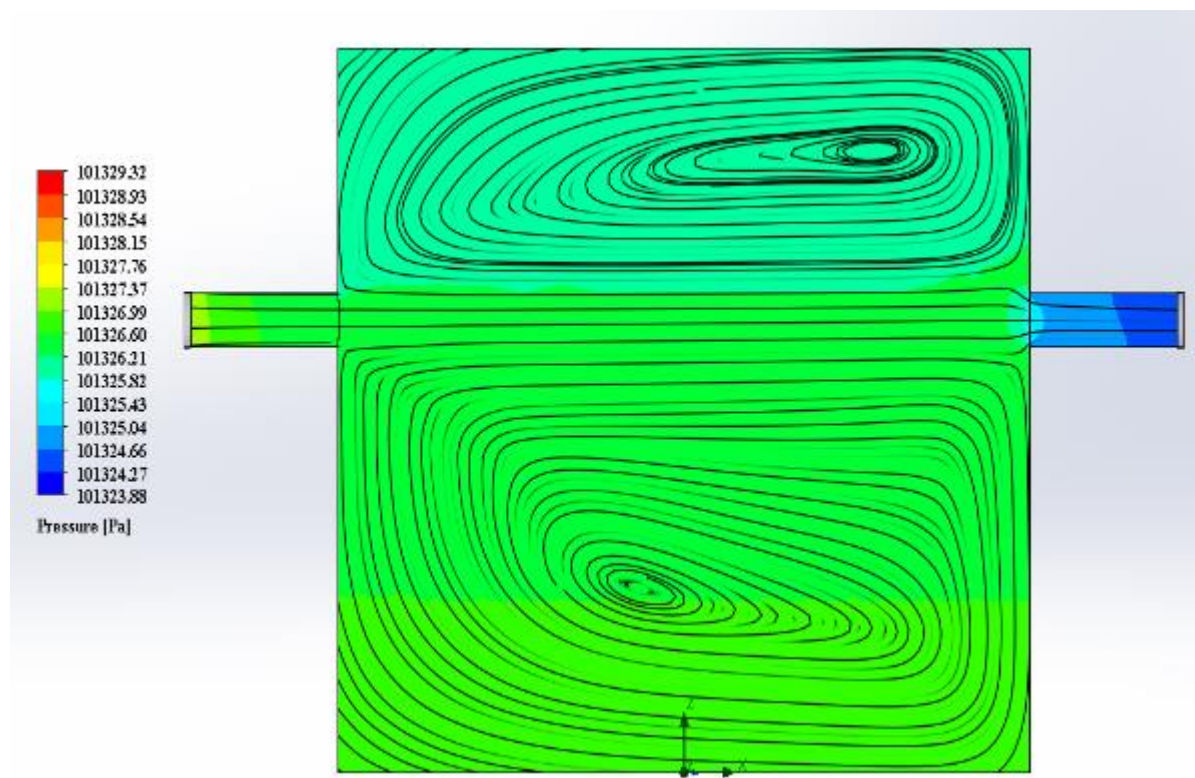

Figure S67. Internal pressure in the reaction cell and current lines, in run 20, for the geometry with lateral air inlet and outlet.

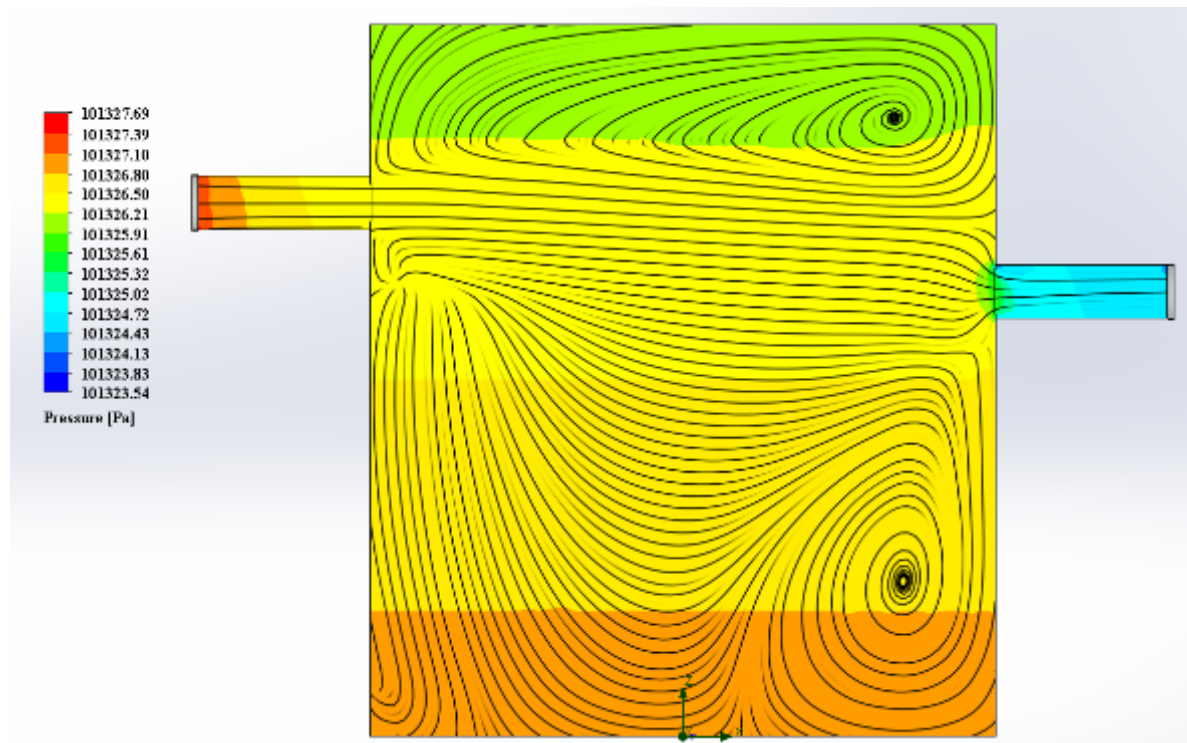

Figure S68. Internal pressure in the reaction cell and current lines, in run 21, for the geometry with lateral air inlet and outlet.

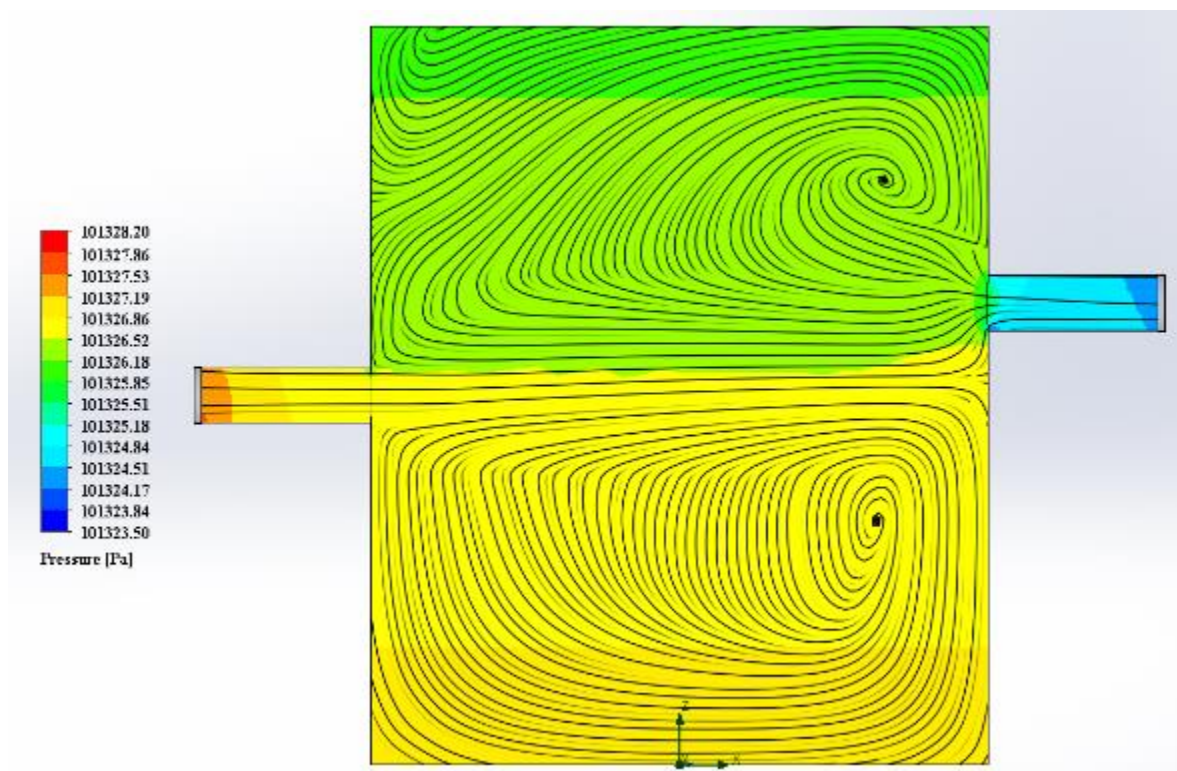

Figure S69. Internal pressure in the reaction cell and current lines, in run 22, for the geometry with lateral air inlet and outlet.

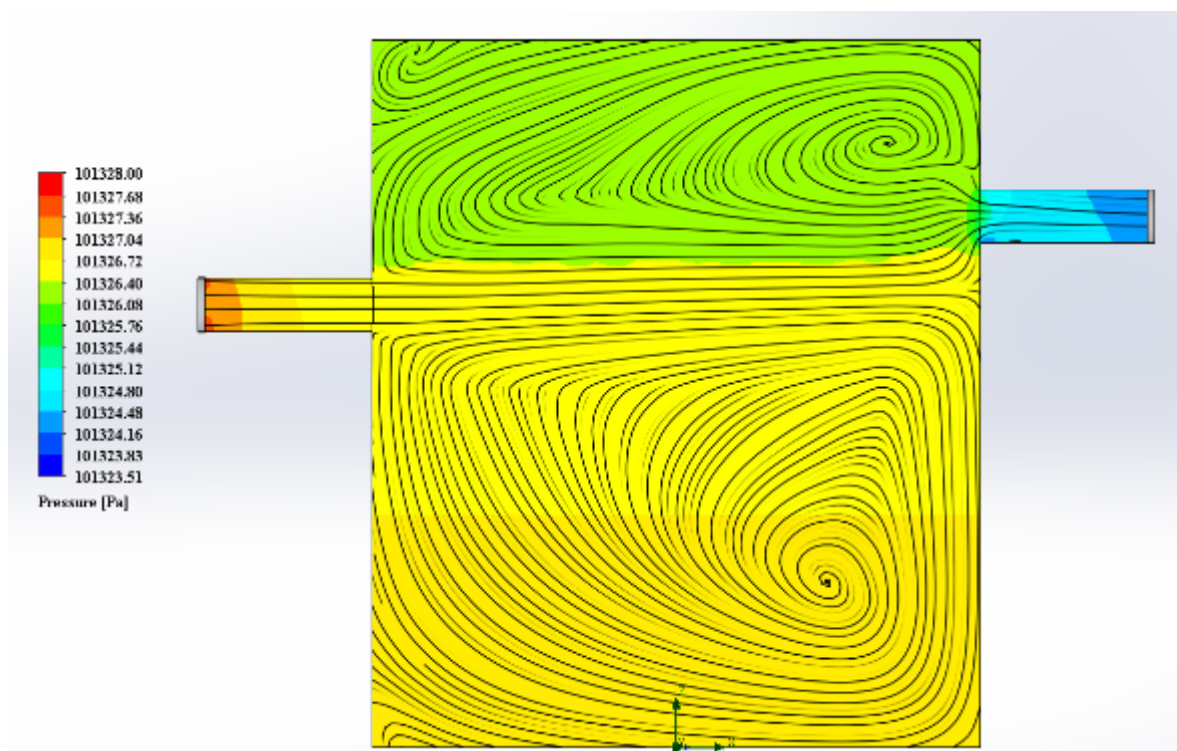

Figure S70. Internal pressure in the reaction cell and current lines, in run 23, for the geometry with lateral air inlet and outlet.

101327.74  
101327.44  
101327.15  
101326.85  
101326.56  
101326.26  
101325.97  
101325.67  
101325.38  
101325.08  
101324.79  
101324.49  
101324.20  
101323.90  
101323.61

Pressure [Pa]

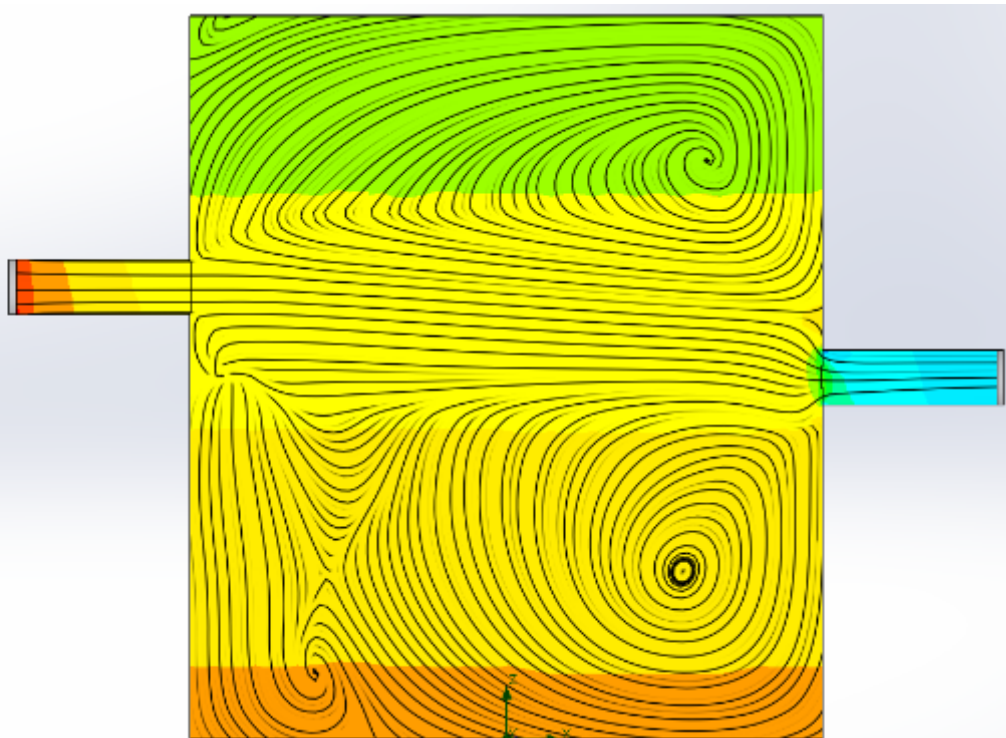

Figure S71. Internal pressure in the reaction cell and current lines, in run 24, for the geometry with lateral air inlet and outlet.

101328.13  
101327.83  
101327.54  
101327.25  
101326.96  
101326.67  
101326.38  
101326.09  
101325.80  
101325.50  
101325.21  
101324.92  
101324.63  
101324.34  
101324.05

Pressure [Pa]

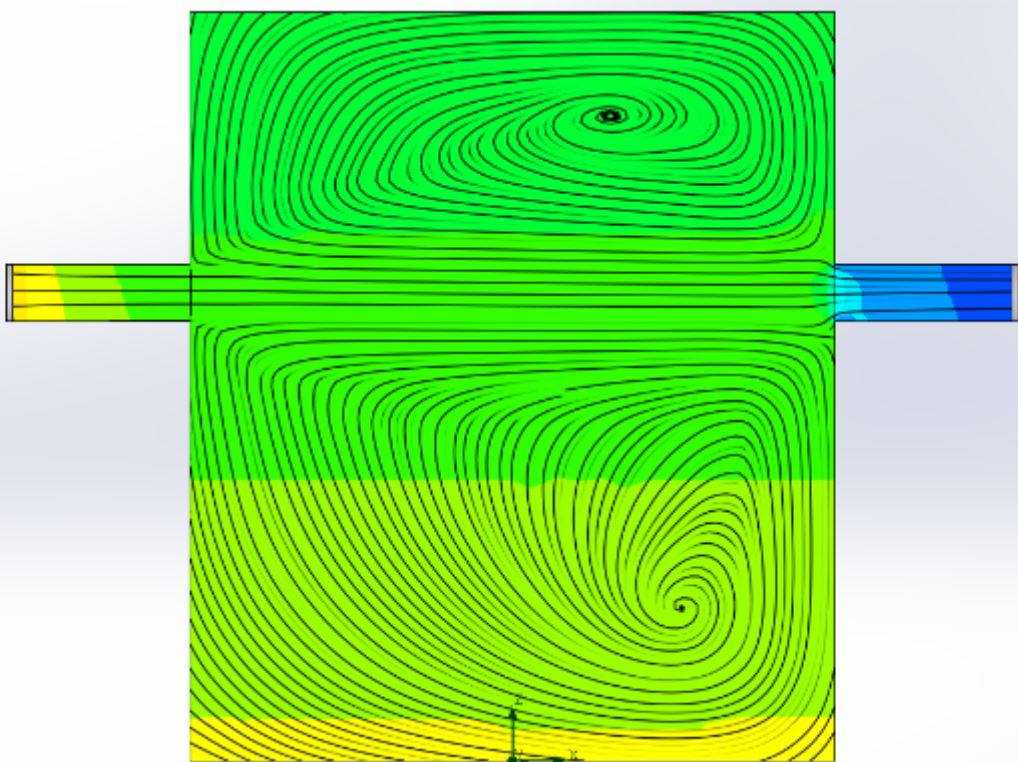

Figure S72. Internal pressure in the reaction cell and current lines, in run 25, for the geometry with lateral air inlet and outlet.

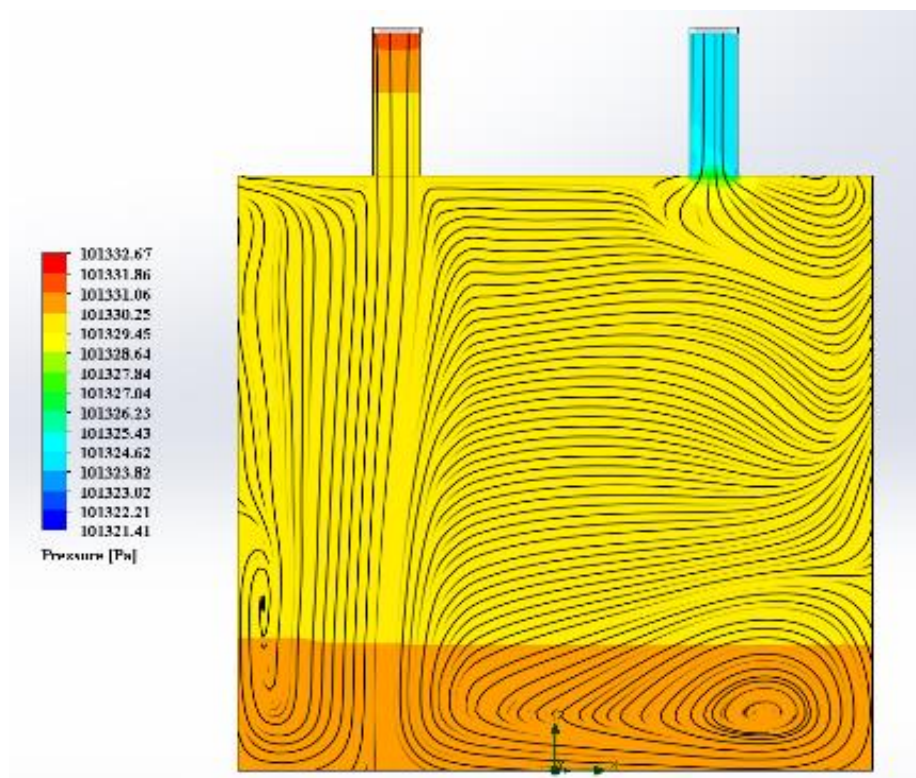

Figure S73. Internal pressure in the reaction cell and current lines, in run 2, for geometry with air inlet and outlet in the upper region.

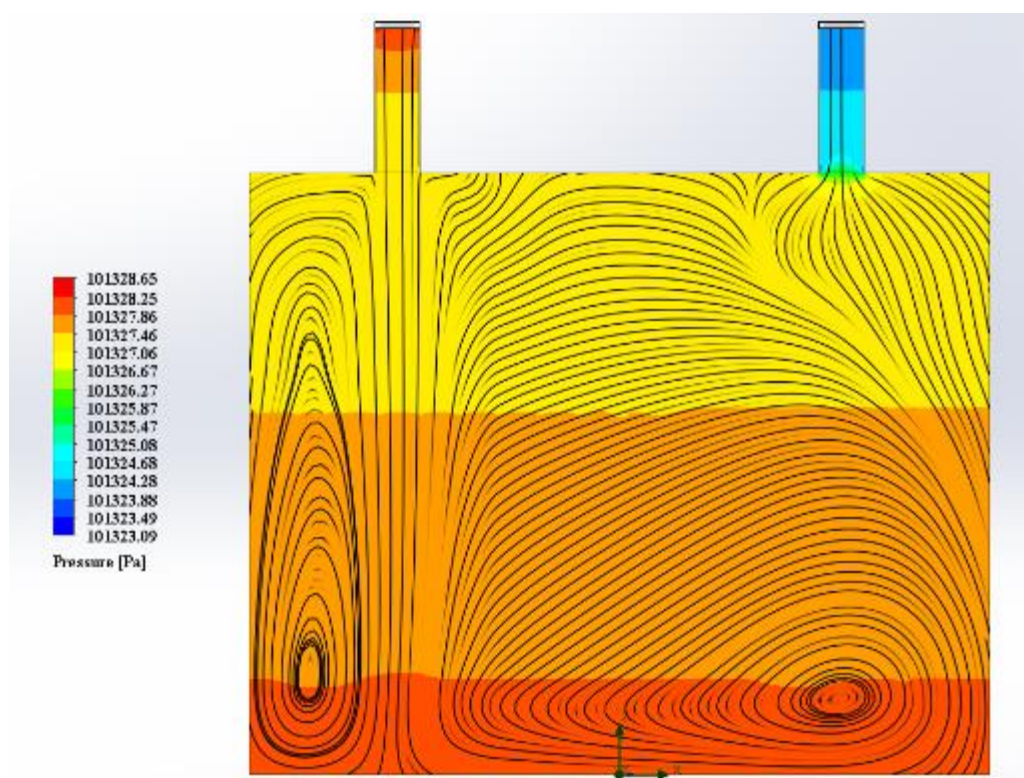

Figure S74. Internal pressure in the reaction cell and current lines, in run 3, for geometry with air inlet and outlet in the upper region.

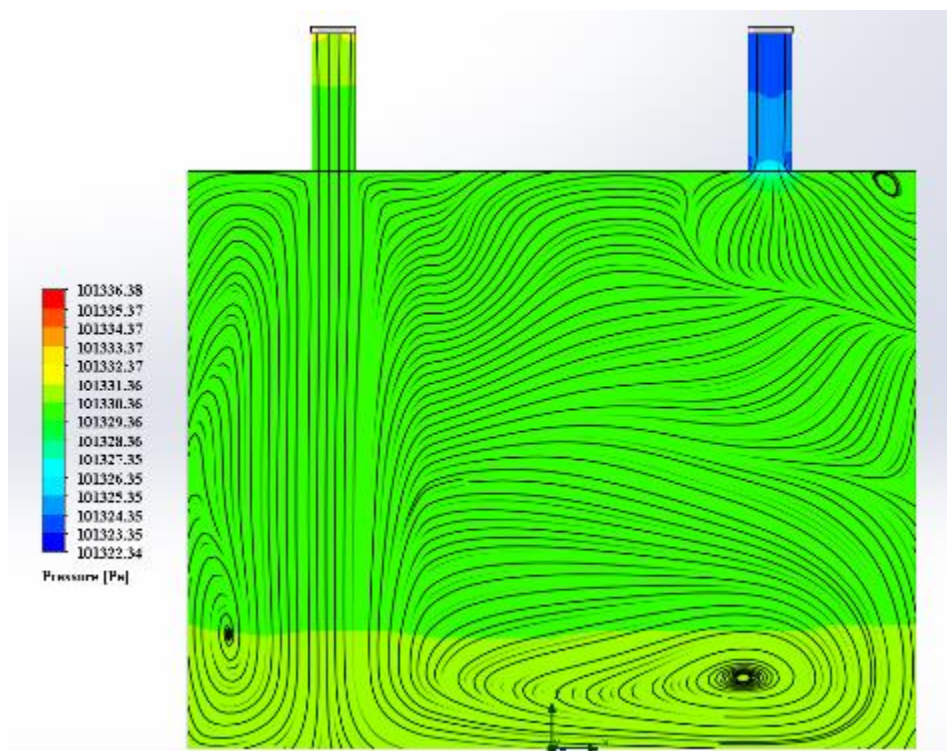

Figure S75. Internal pressure in the reaction cell and current lines, in run 4, for geometry with air inlet and outlet in the upper region.

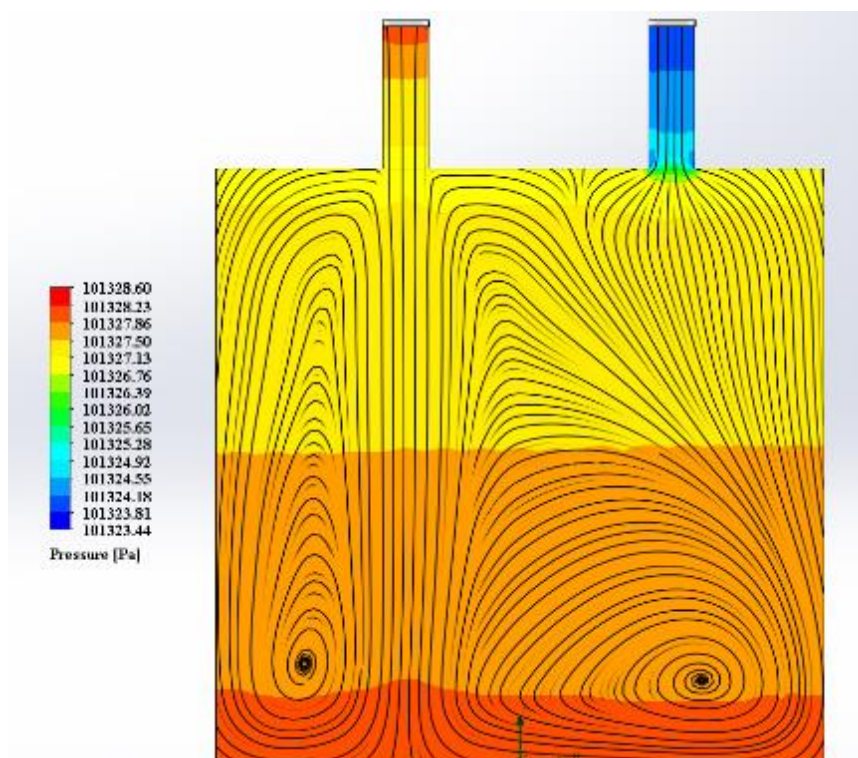

Figure S76. Internal pressure in the reaction cell and current lines, in run 5, for geometry with air inlet and outlet in the upper region.

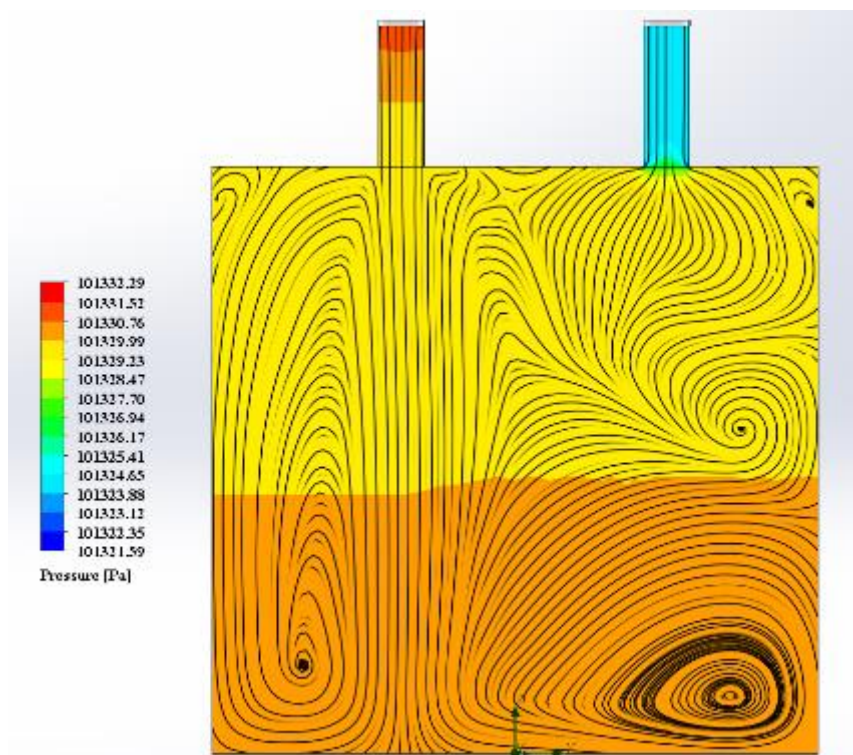

Figure S77. Internal pressure in the reaction cell and current lines, in run 6, for geometry with air inlet and outlet in the upper region.

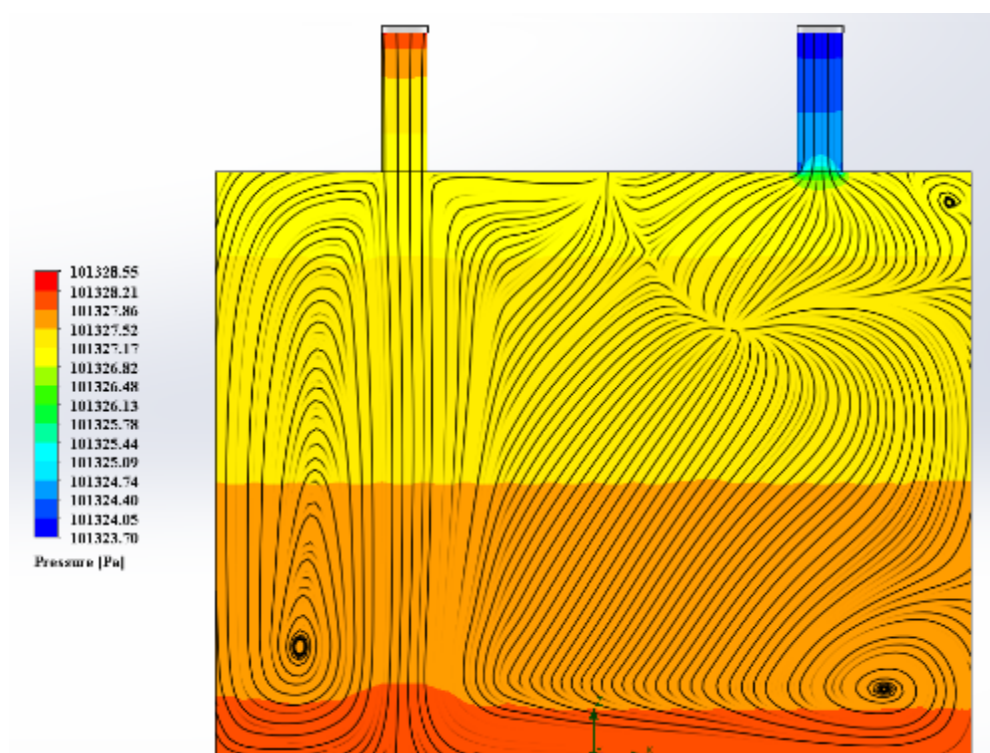

Figure S78. Internal pressure in the reaction cell and current lines, in run 7, for geometry with air inlet and outlet in the upper region.

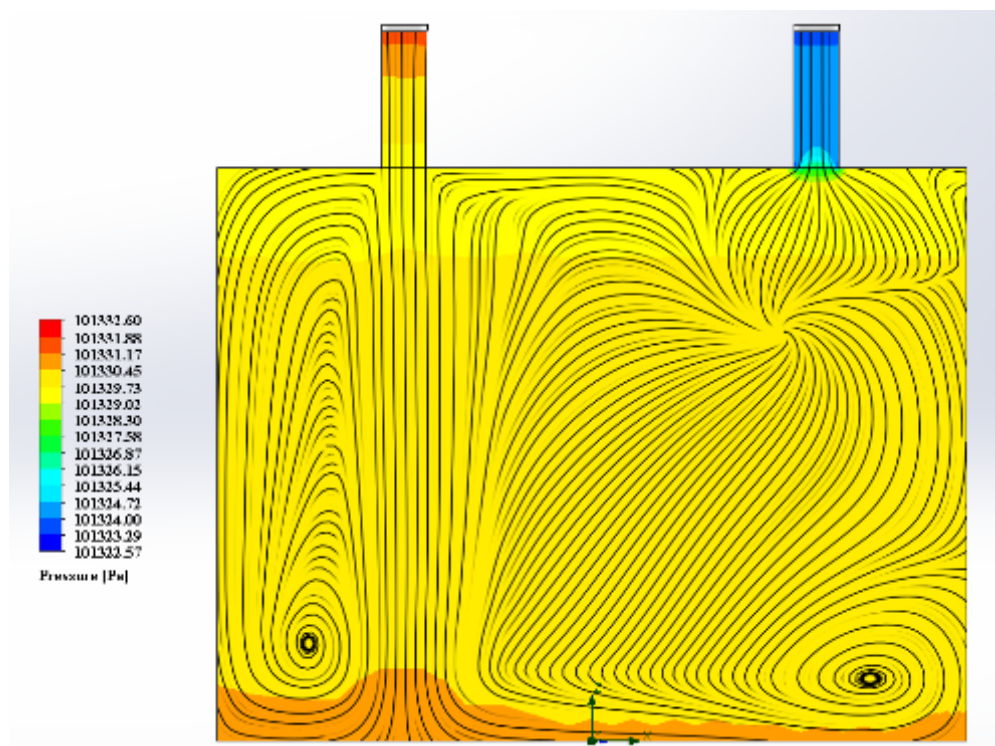

Figure S79. Internal pressure in the reaction cell and current lines, in run 8, for geometry with air inlet and outlet in the upper region.

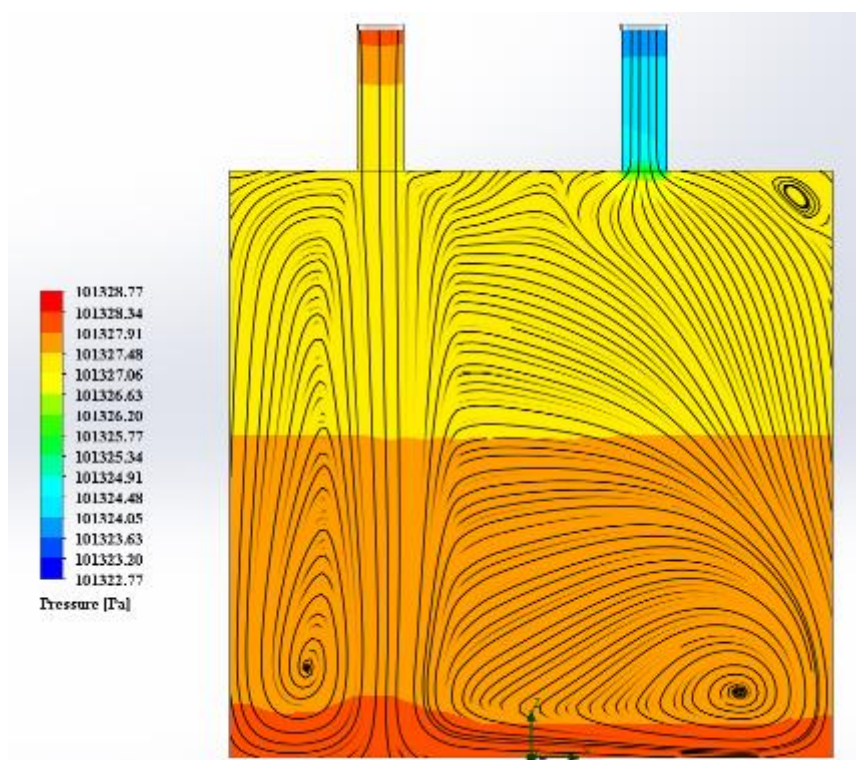

Figure S80. Internal pressure in the reaction cell and current lines, in run 9, for geometry with air inlet and outlet in the upper region.

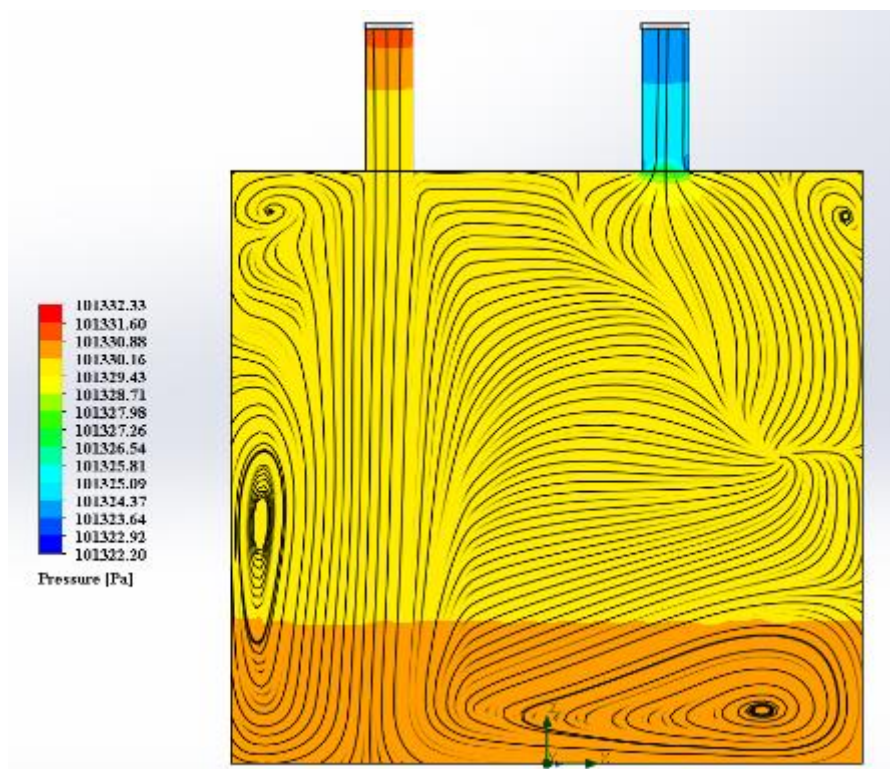

Figure S81. Internal pressure in the reaction cell and current lines, in run 10, for geometry with air inlet and outlet in the upper region.

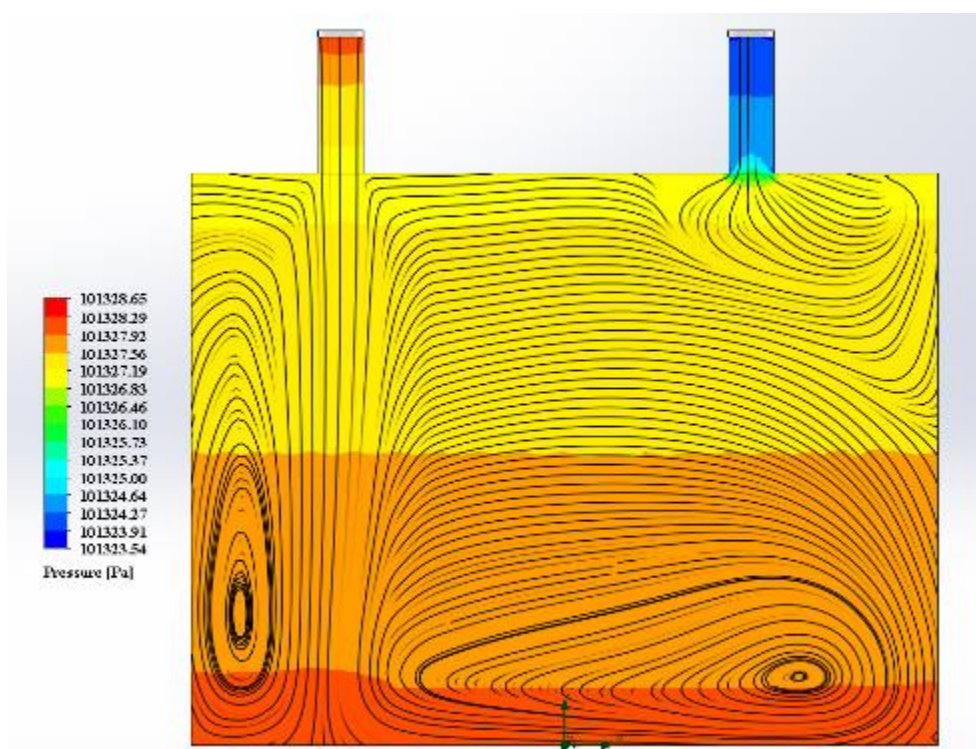

Figure S82. Internal pressure in the reaction cell and current lines, in run 11, for geometry with air inlet and outlet in the upper region.

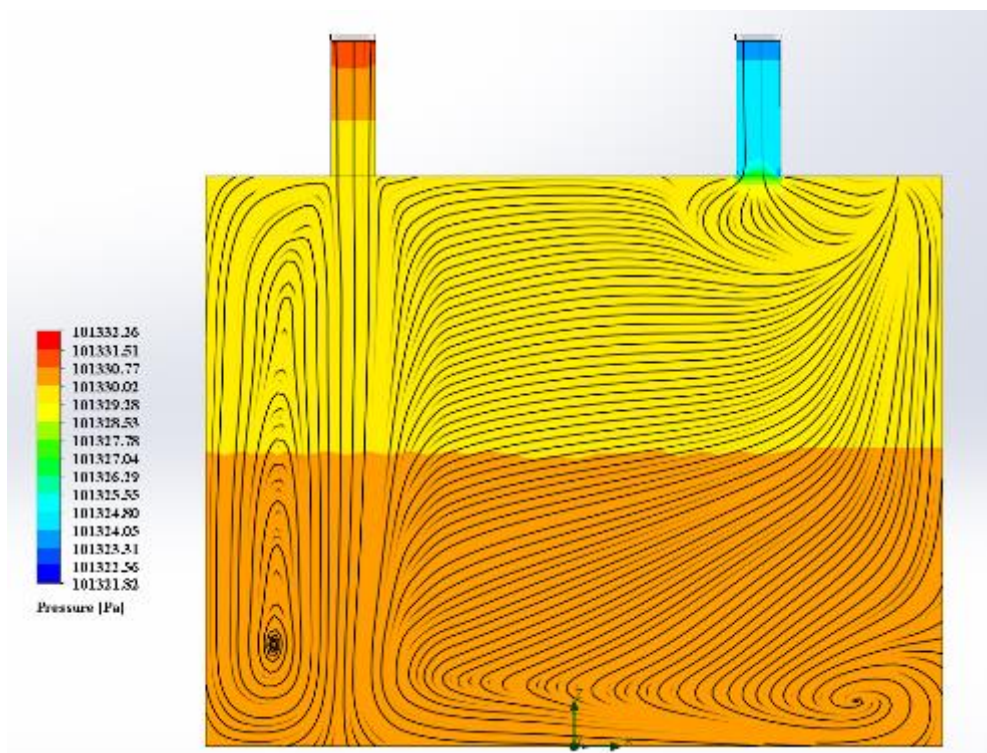

Figure S83. Internal pressure in the reaction cell and current lines, in run 12, for geometry with air inlet and outlet in the upper region.

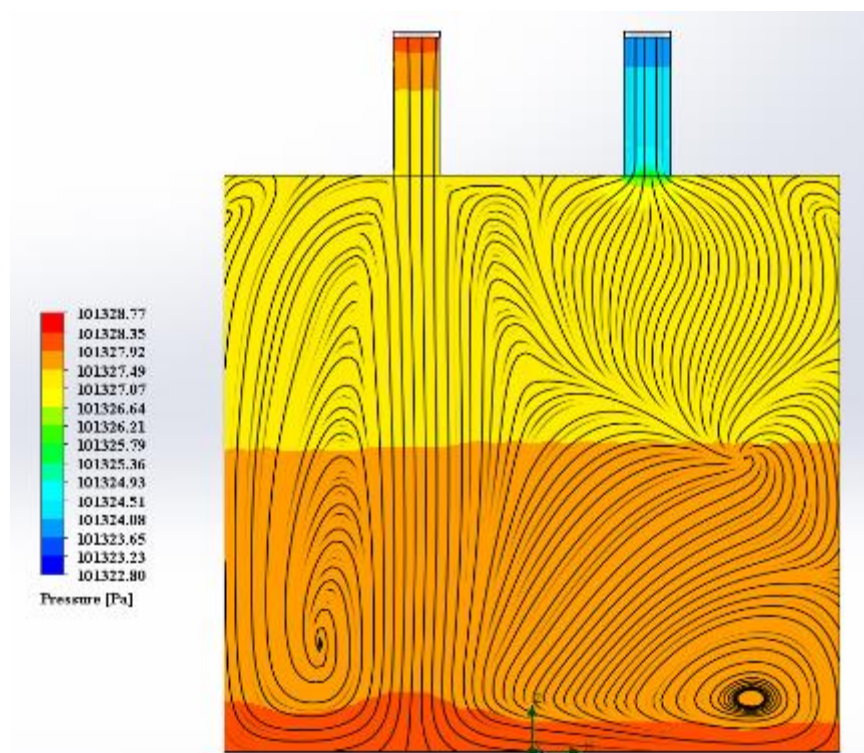

Figure S84. Internal pressure in the reaction cell and current lines, in run 13, for geometry with air inlet and outlet in the upper region.

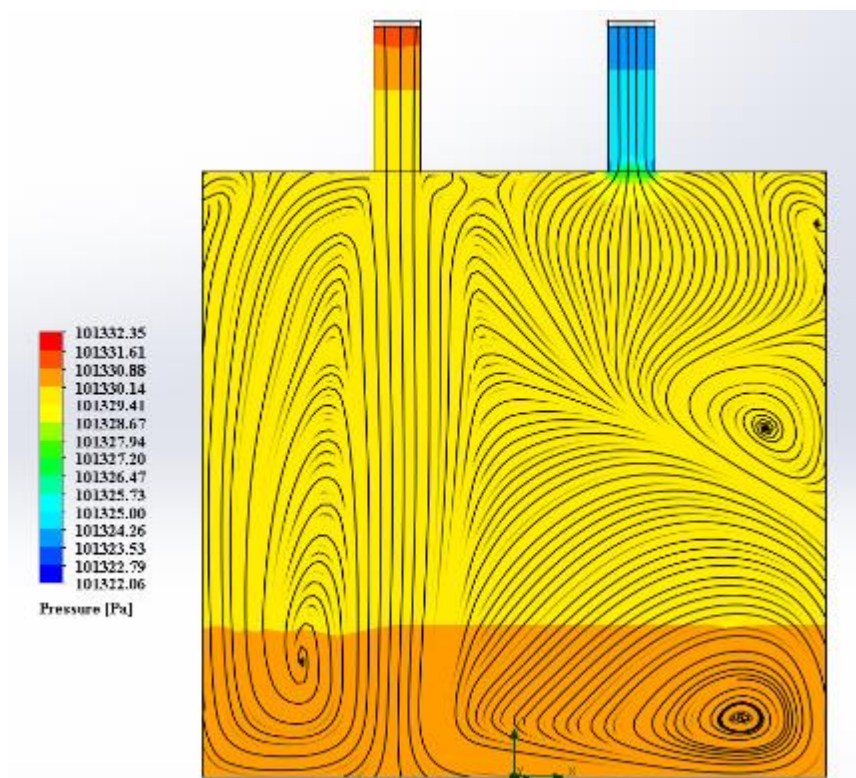

Figure S85. Internal pressure in the reaction cell and current lines, in run 14, for geometry with air inlet and outlet in the upper region.

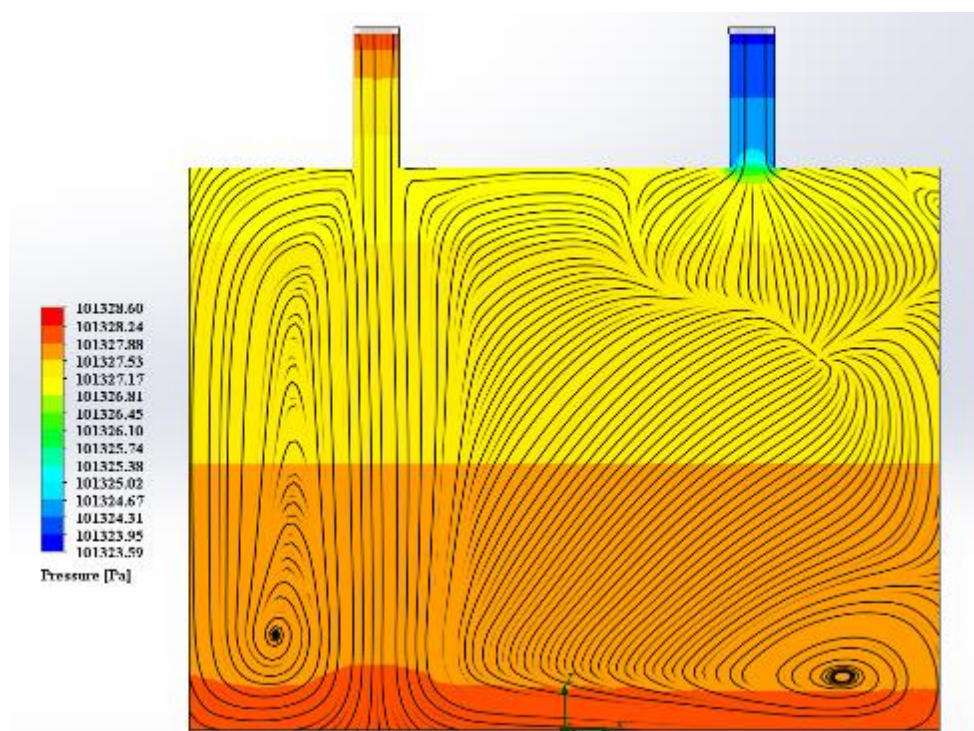

Figure S86. Internal pressure in the reaction cell and current lines, in run 15, for geometry with air inlet and outlet in the upper region.

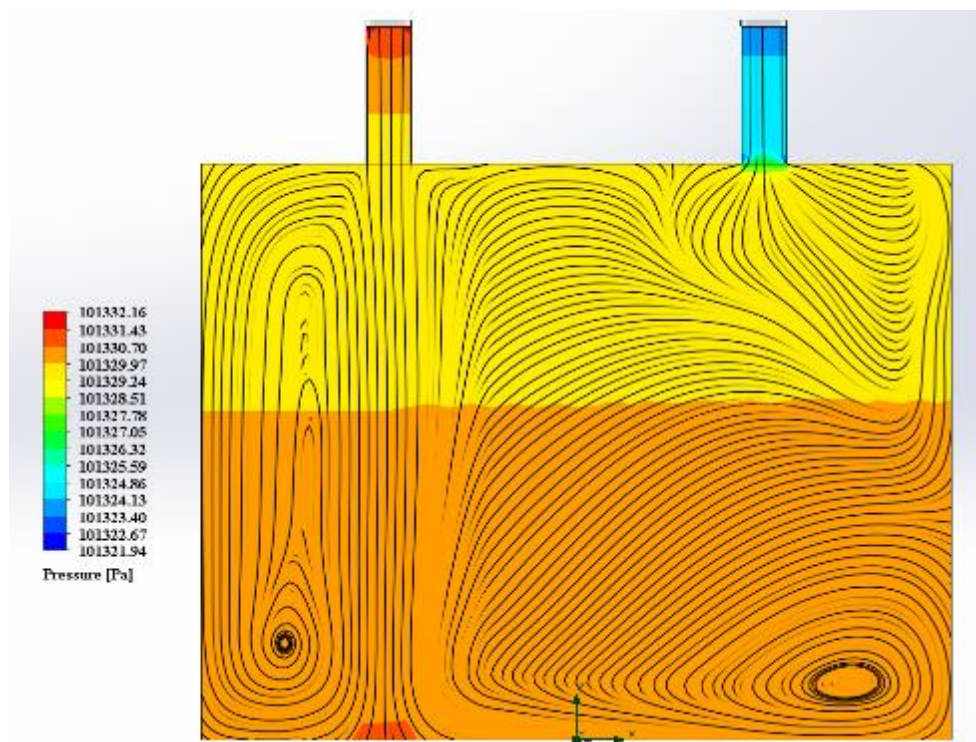

Figure S87. Internal pressure in the reaction cell and current lines, in run 16, for geometry with air inlet and outlet in the upper region.

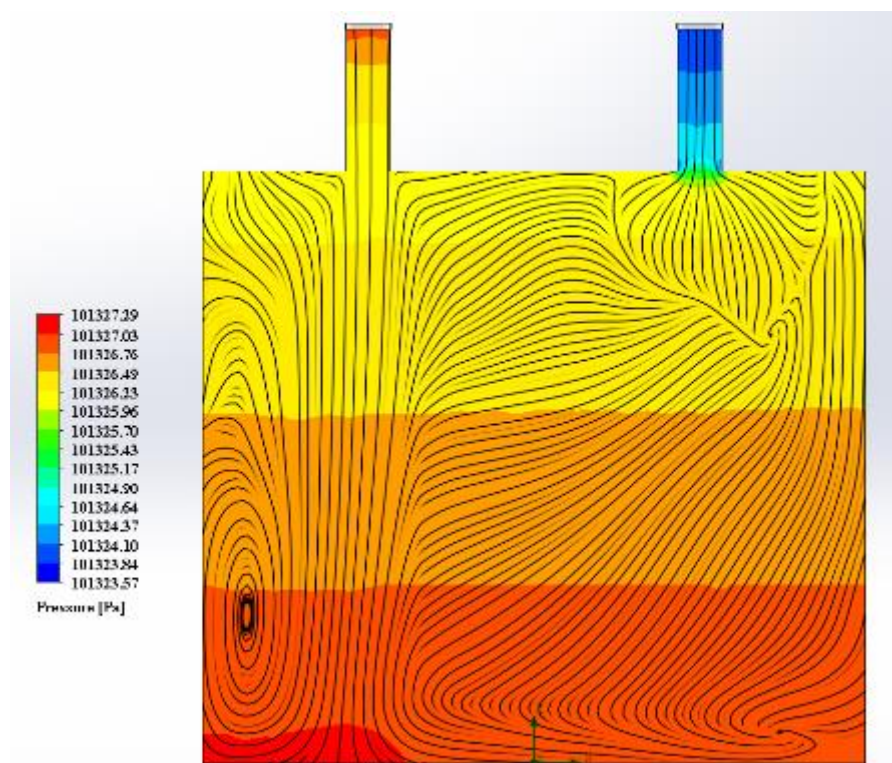

Figure S88. Internal pressure in the reaction cell and current lines, in run 17, for geometry with air inlet and outlet in the upper region.

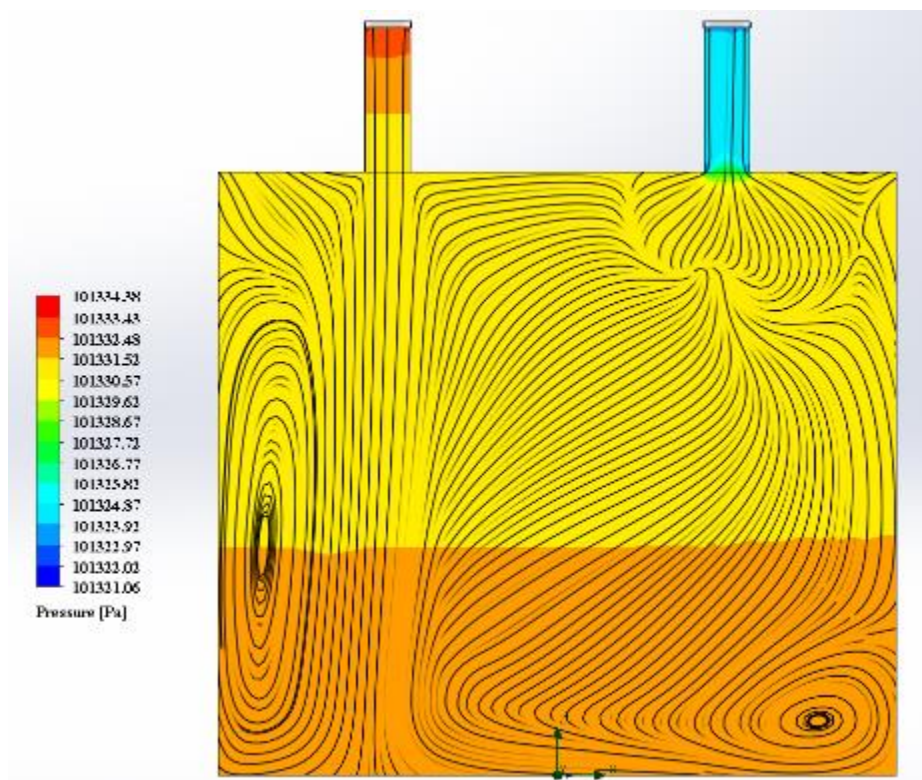

Figure S89. Internal pressure in the reaction cell and current lines, in run 18, for geometry with air inlet and outlet in the upper region.

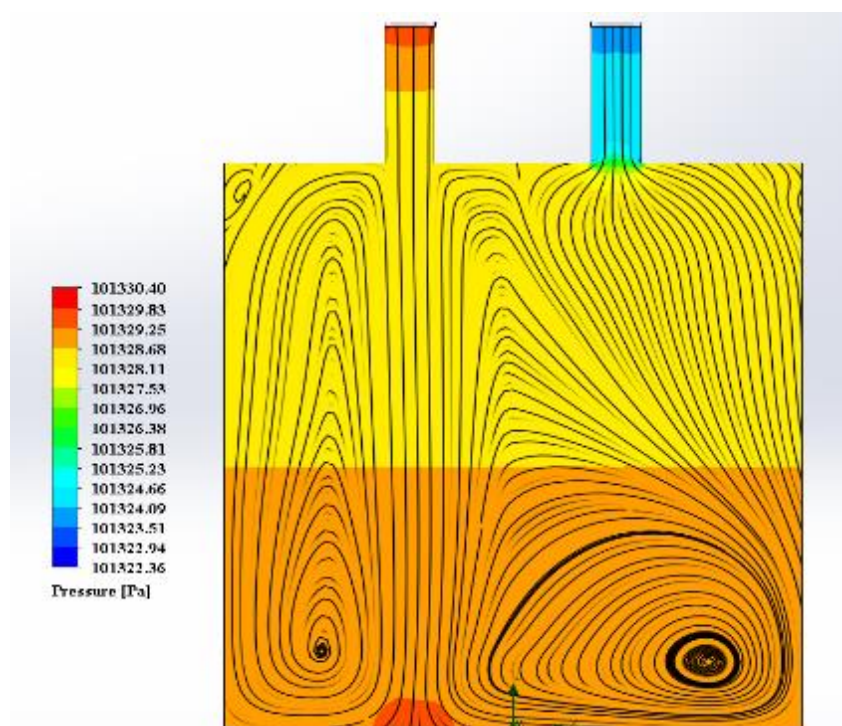

Figure S90. Internal pressure in the reaction cell and current lines, in run 19, for geometry with air inlet and outlet in the upper region.

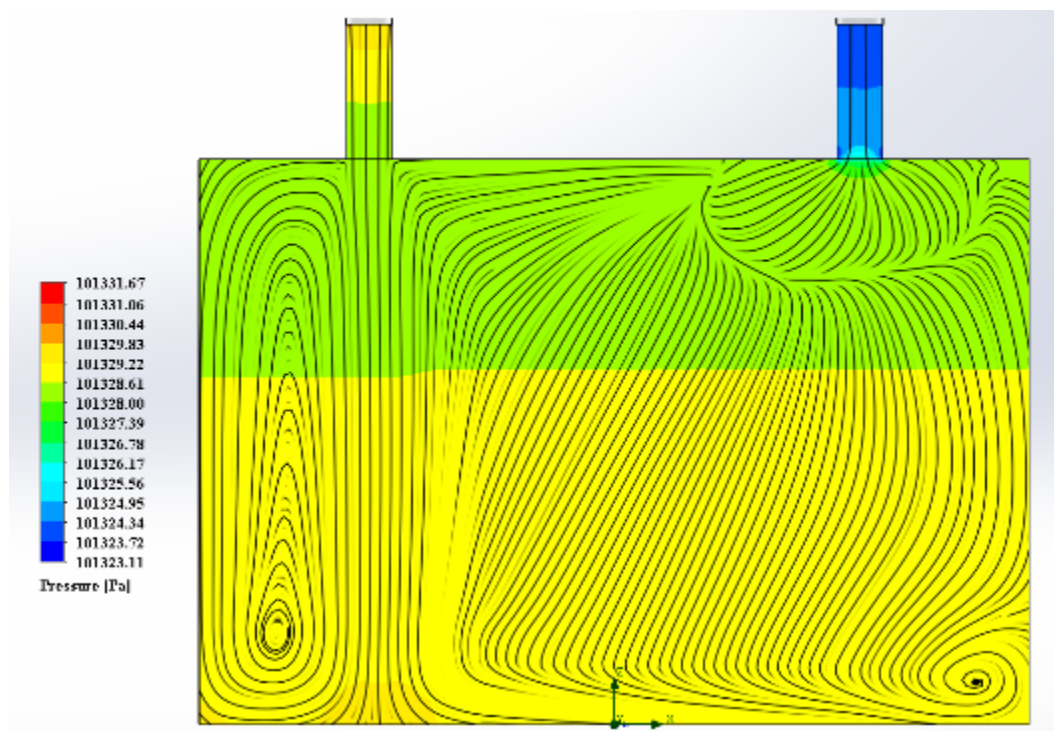

Figure S91. Internal pressure in the reaction cell and current lines, in run 20, for geometry with air inlet and outlet in the upper region.

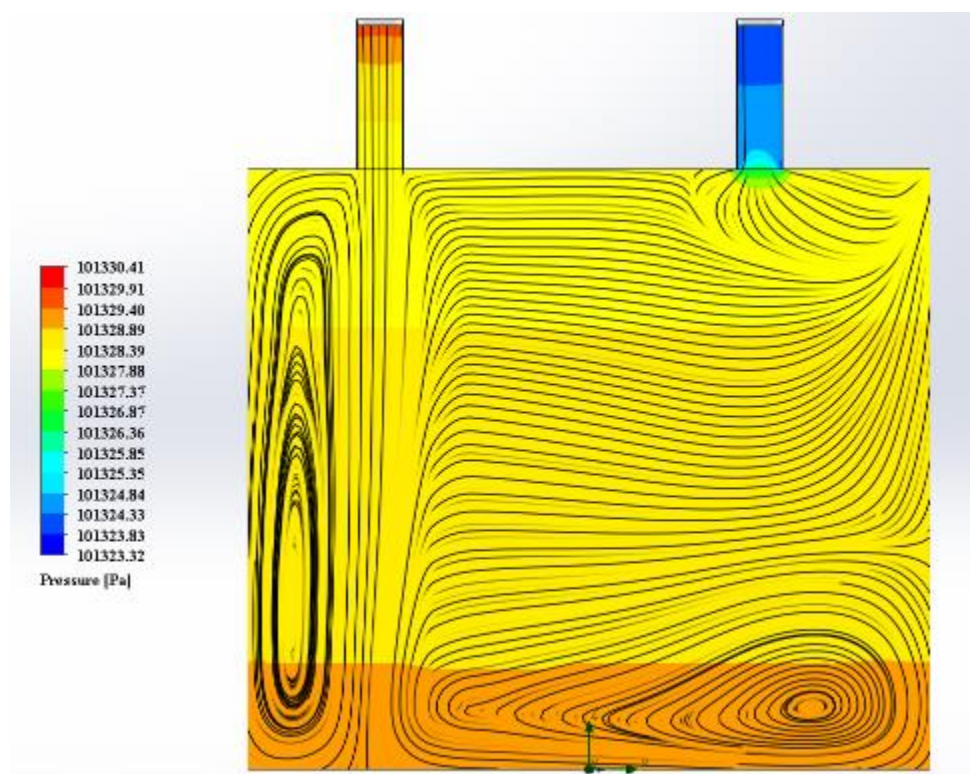

Figure S92. Internal pressure in the reaction cell and current lines, in run 21, for geometry with air inlet and outlet in the upper region.

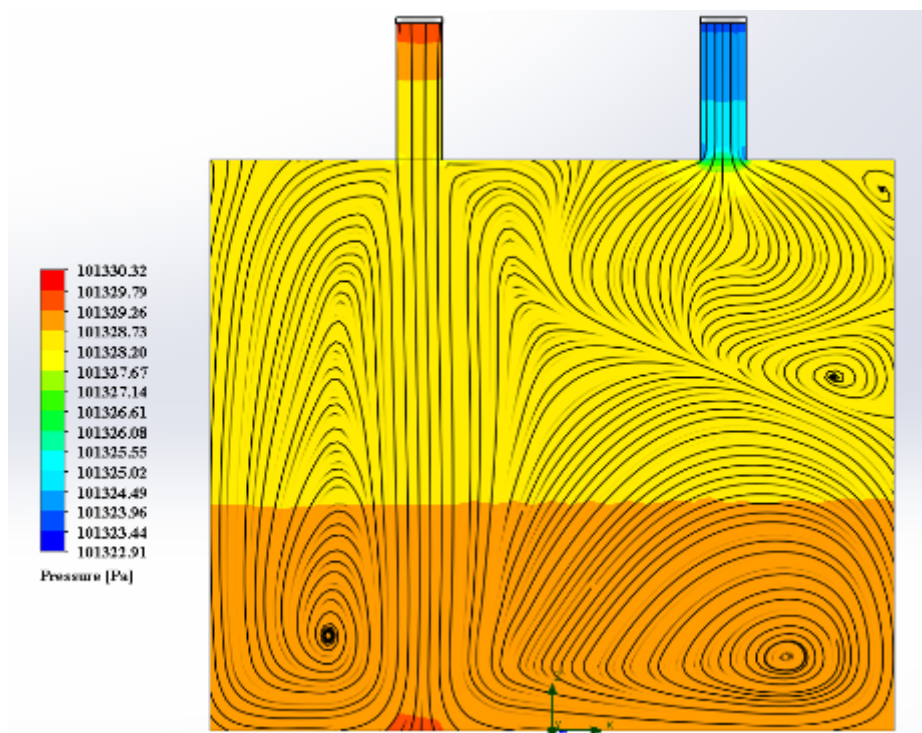

Figure S93. Internal pressure in the reaction cell and current lines, in run 22, for geometry with air inlet and outlet in the upper region.

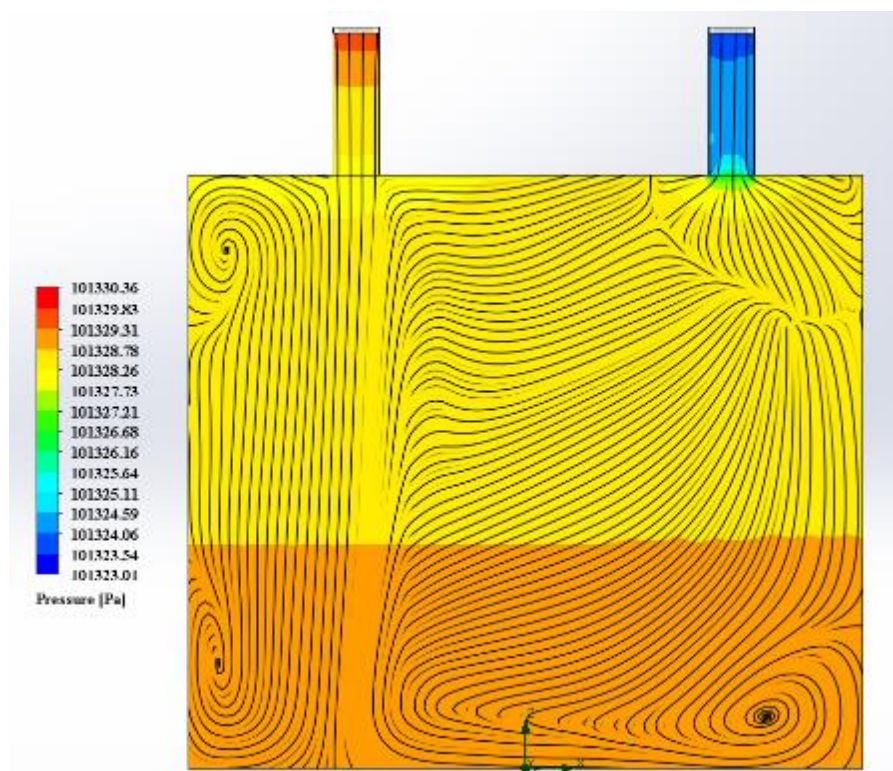

Figure S94. Internal pressure in the reaction cell and current lines, in run 23, for geometry with air inlet and outlet in the upper region.

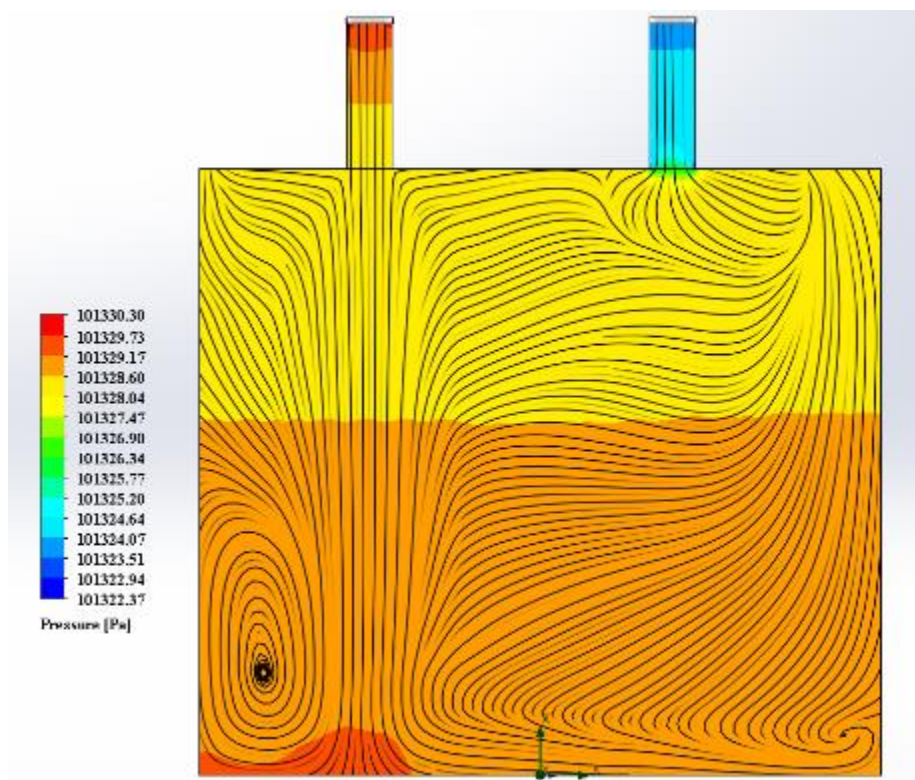

Figure S95. Internal pressure in the reaction cell and current lines, in run 24, for geometry with air inlet and outlet in the upper region.

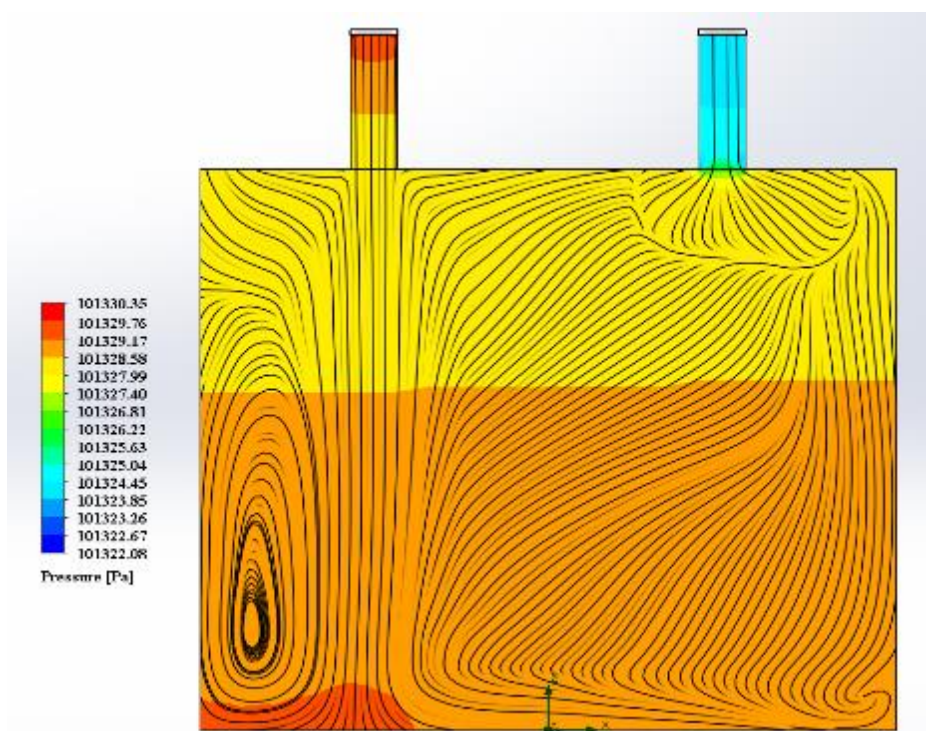

Figure S96. Internal pressure in the reaction cell and current lines, in run 25, for geometry with air inlet and outlet in the upper region.
